# Supplementary material for: Are efforts to attract graduate applicants to UK medical schools effective in increasing the participation of under-represented socioeconomic groups? A national cohort study
Source: PubMed Central journal article supplement — BMJ Open. 2018 Feb 14;8(2):e018946. doi: 10.1136/bmjopen-2017-018946 (PMC5829603; doi:10.1136/bmjopen-2017-018946), 2018-02-14
Supplement: bmjopen-2017-018946.draft_revisions.pdf [file bmjopen-2017-018946.draft_revisions.pdf]

# BMJ Open

BMJ Open is committed to open peer review. As part of this commitment we make the peer review history of every article we publish publicly available.

When an article is published we post the peer reviewers' comments and the authors' responses online. We also post the versions of the paper that were used during peer review. These are the versions that the peer review comments apply to.

The versions of the paper that follow are the versions that were submitted during the peer review process. They are not the versions of record or the final published versions. They should not be cited or distributed as the published version of this manuscript.

BMJ Open is an open access journal and the full, final, typeset and author-corrected version of record of the manuscript is available on our site with no access controls, subscription charges or pay-per-view fees (<http://bmjopen.bmj.com>).

If you have any questions on BMJ Open's open peer review process please email [editorial.bmjopen@bmj.com](mailto:editorial.bmjopen@bmj.com)

# BMJ Open

## Do graduates increase the diversity of the UK medical student body? A national cohort study.

|                                 |                                                                                                                                                                                                                                                                                                                                                                                                                                                                                                                                                                                                                |
|---------------------------------|----------------------------------------------------------------------------------------------------------------------------------------------------------------------------------------------------------------------------------------------------------------------------------------------------------------------------------------------------------------------------------------------------------------------------------------------------------------------------------------------------------------------------------------------------------------------------------------------------------------|
| Journal:                        | <i>BMJ Open</i>                                                                                                                                                                                                                                                                                                                                                                                                                                                                                                                                                                                                |
| Manuscript ID                   | bmjopen-2017-018946                                                                                                                                                                                                                                                                                                                                                                                                                                                                                                                                                                                            |
| Article Type:                   | Research                                                                                                                                                                                                                                                                                                                                                                                                                                                                                                                                                                                                       |
| Date Submitted by the Author:   | 01-Aug-2017                                                                                                                                                                                                                                                                                                                                                                                                                                                                                                                                                                                                    |
| Complete List of Authors:       | Kumwenda, Ben; University of Aberdeen, Centre for Healthcare Education Research and Innovation, School of Medicine, Medical Sciences and Nutrition<br>Cleland, Jennifer; University of Aberdeen, Centre for Healthcare Education Research and Innovation; University of Aberdeen, School of Medicine, Medical Sciences and Nutrition<br>Greatrix, Rachel; University of Nottingham School of Medicine<br>MacKenzie, Rhoda; University of Aberdeen School of Medicine and Dentistry, Institute of Education in Medical and Dental Sciences<br>Prescott, Gordon; University of Aberdeen, Medical Statistics Team |
| <b>Primary Subject Heading</b>: | Medical education and training                                                                                                                                                                                                                                                                                                                                                                                                                                                                                                                                                                                 |
| Secondary Subject Heading:      | Medical education and training                                                                                                                                                                                                                                                                                                                                                                                                                                                                                                                                                                                 |
| Keywords:                       | Medical school admissions, Graduates, UKCAT, Widening access, Statistical analysis                                                                                                                                                                                                                                                                                                                                                                                                                                                                                                                             |
|                                 |                                                                                                                                                                                                                                                                                                                                                                                                                                                                                                                                                                                                                |

SCHOLARONE™  
Manuscripts

# Do graduates increase the diversity of the UK medical student body?

## A national cohort study.

Kumwenda B<sup>1</sup>, Cleland JA<sup>1</sup>, Greatrix R<sup>2</sup>, Mackenzie RK<sup>1</sup>, Prescott GJ<sup>3</sup>

<sup>1</sup> Centre for Healthcare Education Research and Innovation, Institute of Education for Medical and Dental Sciences, School of Medicine, Medical Sciences & Nutrition, University of Aberdeen, UK

<sup>2</sup> UKCAT Consortium, <https://www.ukcat.ac.uk/>

<sup>3</sup> Medical Statistics Team, School of Medicine, Medical Sciences & Nutrition, University of Aberdeen, UK

Corresponding author:

Ben Kumwenda

Centre for Healthcare Education Research and Innovation

Institute of Education for Medical and Dental Sciences,

Polwarth Building,

University of Aberdeen,

Foresterhill,

Aberdeen, UK

AB25 2ZD

Email: [r01bk15@abdn.ac.uk](mailto:r01bk15@abdn.ac.uk)

Tel: 01224437090

Keywords:

Medical admissions, Graduate, UKCAT, admissions, widening access, statistical analysis.

## ABSTRACT

### Introduction

Attracting graduates was recommended as a means of diversifying the UK medical student population. Graduates now make up nearly a quarter of the total medical student population. Research to date has focused on comparing the socio-demographic characteristics of applicants to and/or students on traditional and graduate entry programmes (GEMs), yet GEMs account for only 40% of the graduate medical student population. Thus, we aimed to compare the socio-demographic characteristic and outcomes of graduates and non-graduate applicants across a range of programmes.

### Methods

This was an observational study of 117214 applicants to medicine who took the UKCAT from 2006 to 2014, and who applied to medical school through UCAS. We included applicant demographics, UKCAT total score and offers in our analysis. Applicants were assigned as graduates or non-graduates on the basis of their highest qualification. Multiple logistic regression was used to predict the odds of receiving an offer, after adjusting for confounders.

### Results

Irrespective of graduate or non-graduate status, most applicants were from the highest socio-economic groups and were from a white ethnic background. Receiving an offer was related to gender and ethnicity in both graduates and non-graduates. After adjusting for UKCAT score, the odds ratio of an offer for graduates vs. non-graduates was approximately 0.5 (OR=0.48, 95% CI 0.46-0.49).

### Discussion

Our findings indicate that the aim of diversifying the medical student population on socio-economic grounds by attracting graduates has not been successful. Different approaches must be considered if medicine is to attract and select more socially diverse applicants.

*249 words*

**Strength and limitations of this study:**

- A large multi-cohort study to look at the population of graduate applicants to UK medical schools, including those on Graduate Entry Programme (GEM) and traditional programmes.
- The study uses a contemporary dataset to examine the socio-economic differences of those who apply to medical school; and it is important to know more about who *applies*, as medical schools can only select from the pool of applicants.
- The study examines what socio-demographic factors are associated with receiving an offer to study medicine, and whether these differ in graduates and non-graduates.
- Measures of socio-economic status are self-declared and there was a large proportion of missing socio-economic data for the graduate sub-group.
- Allocating students to an occupational group that depends on their family circumstances (area, parental occupation) can be problematic, especially for mature applicants.

**INTRODUCTION**

Despite much activity, investment and policy directives, people from backgrounds perceived as disadvantaged and minority, ethnic and cultural groups, remain under-represented, or excluded from, medicine worldwide on the basis of, for example, their social class or ethnic origin.<sup>1-5</sup> In the UK, the vast majority of medical students come from the highest socio-economic groups<sup>6-9</sup>, and more than 20% of medical students have attended independent (usually fee paying) schools, compared to an average of 7% of all school pupils.<sup>10</sup> This issue was summarised concisely in a report by the Independent Reviewer on Social Mobility and Child Poverty: 'Medicine . . . has a long way to go when it comes to making access fairer, diversifying its workforce and raising social mobility'.<sup>10</sup>

In the UK, most students enter medicine as school-leavers aged 17-20 years. In 1997, the UK Medical Workforce Standing Advisory Committee (MWSAC) recommended that one way of diversifying the medical student population was to attract graduates into medical schools.<sup>11</sup> The assumption behind this was that, by accepting students with more life experience, the diversity of students and hence doctors would be increased<sup>12-15</sup>, and this would result in more doctors willing to

1  
2  
3 work in deprived and underserved areas.<sup>16-18</sup> This recommendation led to the introduction (in 2000)  
4 of the first four-year graduate entry medical courses (GEM), as well as a more general drive to  
5 encourage graduates into medicine.  
6

7  
8 Graduates now make up nearly a quarter of the contemporary UK medical student population.<sup>13,19</sup>  
9 However, to date, there is relatively little information relating to whether, or not, attracting  
10 graduates has increased the diversity of medicine in the UK. Earlier studies tend to be single-site  
11 and/or focused on the relative performance of graduates versus school-leaver entrants.<sup>20-26</sup> In an  
12 exception to this, Mathers and colleagues carried out a large-scale study of applicants to 31 UK  
13 medical schools between 2002 and 2006 in order to determine whether the newly introduced GEM  
14 programmes had widened access to medicine.<sup>6</sup> They concluded that graduate entry programmes do  
15 attract more students from less affluent backgrounds than traditional five-year programmes but  
16 overall GEMs had not led to significant changes to the socio-economic profile of UK medical student  
17 population. It could be argued, however, that this study was undertaken too soon after the  
18 establishment of the first GEM programmes to assess their true impact, given the typical time lag  
19 between policy implementation and impact on practice in education.<sup>27</sup>  
20  
21

22  
23 Moreover, GEM programmes only account for about 10% of all medical programmes: there are more  
24 graduates in traditional five-year programmes than in GEM programmes. Yet, to the best of our  
25 knowledge, no previous studies have looked directly at the whole population of graduate medical  
26 students – that is, those on both GEM and traditional programmes.  
27

28  
29 Finally, most studies have only looked at those graduates who were successful in obtaining a place at  
30 medical school.<sup>6,28</sup> It is also important to know more about who *applies*, as medical schools can only  
31 select from the pool of applicants.<sup>8</sup> In one of the few studies looking at both applicants and  
32 admissions, Garrud found some differences between both applicants and admissions to graduate-  
33 entry and traditional programmes, mostly in terms of ethnicity, but did not examine differences in  
34 terms of socio-economic markers.<sup>29</sup>  
35

36  
37 To address these gaps in the literature we used a contemporary dataset to compare the socio-  
38 demographic characteristics of graduates and non-graduate applicants to medicine. The main  
39 objective was to determine whether graduate and non-graduate applicants to medicine differ on a  
40 range of socio-demographic variables. Our second aim was to examine what socio-demographic  
41 factors are associated with receiving an offer to study medicine, and whether these differ in  
42 graduates and non-graduates.  
43  
44  
45  
46  
47  
48  
49  
50  
51  
52  
53

## METHODS

### Study context

Data were obtained from the UKCAT database which comprises data from two sources: UCAS and UKCAT (<http://www.ukcat.ac.uk/>). UKCAT is the UK Clinical Aptitude Test for applicants to medical and dental schools. UCAS is the Universities and Colleges Admissions Service, a UK-based organisation whose primary role is to operate the application process for British universities. Through the UCAS system (<https://www.ucas.com/>), candidates can apply to up to four medical courses out of five options in any one cycle, but there is no preference order of course choice. We compiled data for all candidates who sat the UKCAT between 2006 and 2014, and who applied to medical school through UCAS.

The UKCAT database only holds UCAS data relating to UKCAT candidates who have applied to a UKCAT University. Therefore, the data is a subset of graduate applicants to UK Universities. A number of graduate entry programmes use other admission tests (both BMAT and GAMSAT). Of the 16 graduate entry programmes in the UK, 7 require the UKCAT, 4 require GAMSAT, and one programme requires a BMAT.<sup>30</sup> The other four graduate entry programmes do not use any of these admission tests. Where UKCAT candidates have applied to non-UKCAT Universities these choices and the outcome of these choices are not known.

Although individuals can have multiple applications, within and between years, the socio-demographic variables presented in this study are per unique applicant. These variables include gender; ethnicity; domicile; secondary school attended, domicile (United Kingdom (UK), International, European Union (EU)). The socio-economic status (SES) of the candidates was determined by parental National Statistics Socio-Economic Classification (NS-SEC) and Index of Multiple Deprivation (IMD), an area-based measurement of material deprivation.

### Design and procedures

Access to the data was via a safe haven<sup>31</sup> (to ensure adherence to the highest standards of security, governance and confidentiality when storing, handling and analysing identifiable data). Ethical approval was not required because the focus of this study was a secondary analysis of anonymised data, and applicants had given permission for their data to be used for research purposes. Data files were merged into a single SPSS file for cleaning and analysis. What follows in this paper is the summary of UKCAT applicants for whom we managed to match at least 50% of the records.

1  
2  
3 The applications were assigned into two categories; graduate or non-graduate at the time of  
4 application. This was primarily based on applicants' highest qualification but some amendments  
5 were necessary. For example, where this information was missing, we imputed the outcome variable  
6 based on applicants' age and programme applied. For instance, all applicants aged less than 20 on  
7 their final UKCAT attempt were assumed to have applied shortly after leaving school; these were  
8 classified as school-leavers, or non-graduate applicants. Similarly, applicants with missing  
9 information on academic qualification, aged over 21 and had applied for a graduate entry  
10 programme were classified as 'graduates'. The outcome measures were the UKCAT score, and  
11 whether the applicant received an offer or not. We also considered all conditional and unconditional  
12 offers as an 'offer'.  
13  
14  
15  
16  
17  
18  
19  
20  
21  
22

### 23 **Statistical analysis**

24  
25 All the data were analysed using SPSS (IBM SPSS Statistics for Windows Version 22.0. Armonk, NY:  
26 IBM Corp). The results are reported in terms of numbers, percentages and mean (standard  
27 deviation) or median (interquartile range) as appropriate. The UKCAT scores were normally  
28 distributed. Therefore we used independent-samples t-test to compare the means between two  
29 groups. One-way analysis of variance (ANOVA) was used to compare means between more than two  
30 independent groups. A binary logistic regression analysis was employed to predict the odds of  
31 getting an offer from an application based on an applicant's graduate status. The specific factors we  
32 adjusted for in the regression models were: socio-economic status (NS-SEC and IMD), gender,  
33 graduate status, ethnicity and the total UKCAT score. The purpose was to assess the odds of  
34 receiving an offer for a graduate relative to a non-graduate after accounting for any differences in  
35 total UKCAT score. The analysis considered only the final application of each applicant to ensure  
36 independence (i.e., to control for those who made repeated applications).  
37  
38  
39  
40  
41  
42  
43  
44  
45  
46  
47  
48  
49  
50  
51  
52  
53  
54  
55  
56  
57  
58  
59  
60



## RESULTS

From 2006 to 2014, the UKCAT database comprises 117214 applicants to medicine, applying through UCAS on a total of 146146 occasions (i.e. some applied in more than one cycle and hence sat the UKCAT more than once). 23.6% of the applicants were graduates and 76.4% non-graduates. The median age for the non-graduate applicants was 18 years: 23 years for the graduate applicants.

Table 1 summarises a comparison of graduate and non-graduate applicants by different sociodemographic factors. The main pattern across the two groups was that most applicants were from the highest socio-economic group, with nearly 80% of all applicants having a parent/guardian in the managerial and professional occupations. The groups were also similar in that one-fifth of the graduate and non-graduate applicants had attended a fee-paying (independent) school. The sample was predominantly of candidates from white ethnic backgrounds, for both graduates 64.3% (n=14014), and non-graduates 61.9% (n=47103). Around 7.7% of the graduates were classified as international applicants, as compared to 12.1% of the non-graduate applicants. The number of EU applicants was similar for both graduates (6.0%) and non-graduates (7.6%).

..... Table 1 about here.....

Non-graduate applicants performed significantly better on the UKCAT (2535.4 points, SD=268.2) than graduate applicants (2498.5 points, SD=285.7),  $p<0.001$ . Graduates and non-graduate applicants from the top 20% affluent neighbourhoods (IMD 'I') obtained better UKCAT scores than applicants from the 20% most deprived areas (IMD 'V'). The difference was approximately 200 points for graduate applicants, and the same margin was observed in the non-graduate group. A similar pattern was also observed with parental occupation classification (NS-SEC) categories with the difference of over 100 UKCAT points between managerial and professional occupations and routine/semi-routine occupations.

The proportion of applicants who received offers was substantially lower for graduates (27.7%) than it was for non-graduates (47.9%). Graduate applicants who received offers had significantly better mean UKCAT scores (2697.7 points, SD=244.39) compared to their non-graduate colleagues who received offers (2657.7 points, SD=235.3),  $p<0.001$ . The pre-admission attainment information (UKCAT scores) is summarised in Table 2.

..... Table 2 about here.....

A binary logistic regression analysis was employed to predict the odds of getting an offer based on the applicant's highest qualification (graduate or not) and total UKCAT score. After adjusting for UKCAT score, the odds ratio of an offer for graduates vs. non-graduates was approximately 0.5 (OR=0.48, 95% CI 0.46-0.49).

Several variables that were considered to be representative of widening participation (WP) backgrounds were included in univariate analyses. The multiple logistic regression analysis was repeated including, in addition to UKCAT and graduate status, only those variables that were statistically significant ( $p \leq 0.05$ ) when associated with offer status. The specific factors were gender, ethnicity and socio-economic class (IMD and NS-SEC). We also tested for interaction of these factors which enabled us to ask whether graduates from different socio-economic backgrounds were more or less likely to receive offers. The overall model performance, using *Nagelkerke's R<sup>2</sup>* ranged from 0.20 to 0.23 across the models developed. Results of the two-way interaction terms (Table 3) showed that after adjusting for other factors, the additional effect of socio-economic disadvantage for graduates (compared to non-graduates) was small and did not reach statistical significance ( $p=0.25$  for the interaction of graduate status and IMD;  $p=0.23$  for the interaction of graduate status and parental occupation (NS-SEC)). The result suggests that the association between socio-economic disadvantage and the likelihood of getting an offer for medical school affected graduates and non-graduates in a similar way.

..... Table 3 about here.....

Figure 1 gives a graphical summary of the results from final model. In general, the odds of getting an offer to study medicine were lower if the applicant was male, graduate, from black and minority ethnic (BME) background, and from lower socioeconomic groups (NS-SEC1, and IMD 'I' – least affluent neighbourhood). Figures 2 and 3 give a graphical summary of the odds ratio after separating graduates and non-graduates, to help further illustrate the difference between the two groups. For the non-graduates, the pattern is almost the same as the combined model in that the odds of getting an offer were higher if the applicant was female, from white ethnic background, and from high socioeconomic groups (NS-SEC1, and IMD I – most affluent neighbourhood). Some explanation for this pattern is because the non-graduates were in such a high proportion of the whole group. In comparison, for graduates, the predictor values that stand out are gender and ethnicity. However,

1  
2  
3 notably, nearly a quarter of graduate applicants had a missing socio-economic profile data (NS-SEC)  
4 which may explain why SES measures were less important predictors for graduates.  
5

## 6 **DISCUSSION**

7

8  
9 In this analysis of a large, multi-cohort contemporary dataset, we examined differences between  
10 graduates and non-graduate applicants to UK medical schools. Unlike previous studies in this area,  
11 we compared a larger sample of graduate applicants with non-graduates, rather than comparing by  
12 course (traditional versus GEM). This allowed us to capture the characteristics of a broader group of  
13 graduate applicants compared to earlier studies. Our results show that graduate and non-graduate  
14 applicants to UK medical schools are very similar on a range of socio-demographic markers, including  
15 multiple markers of socio-economic status. This indicates that, even with time and much investment  
16 in GEM courses, the aim of diversifying the medical student population on socio-economic grounds  
17 by attracting graduates has not been successful.<sup>6</sup>  
18

19 Interestingly, unlike previous studies<sup>29</sup>, we did not identify any differences across graduates and  
20 non-graduates in terms of ethnicity. This may represent a change in the medical student population  
21 overall or may be an artefact of study design given that we looked at graduates in all medical  
22 programmes, not just GEM programmes.  
23

24 We also looked at who received an offer. The patterns across non-graduates and graduates were  
25 similar in terms of gender and ethnicity. In non-graduates, offers to study medicine were higher if  
26 the applicant was from a higher socio-economic group. However, measures of socio-economic status  
27 are self-declared and there was a large proportion of missing socio-economic data for the graduate  
28 sub-group. This reflects patterns seen in other similar studies.<sup>32-36</sup> Given the high proportion of  
29 missing data it would be misleading to conclude that IMD and NS-SEC are weaker predictors for  
30 assessing the likelihood of getting an offer among graduate applicants because many graduate  
31 applicants were excluded from the logistic regression analysis and the missing data could also have  
32 led to insufficient power to detect smaller effects. Moreover, allocating students to an occupational  
33 group that depends on their family circumstances (area, parental occupation) can be problematic,  
34 especially for mature students.<sup>37,38</sup> However, we had no other measures available to us: no matter  
35 how limited<sup>32,34</sup>, those used are the 'basic units' that indicate educational disadvantage in the UK.  
36 We urge organisations such as UCAS and UKCAT to explore ways of improving self-declared data  
37 reporting, and government bodies such as the UK's Office for National Statistics to explore more  
38 effective measures of socio-economic status.  
39  
40  
41  
42  
43  
44  
45  
46  
47  
48  
49  
50  
51  
52  
53  
54  
55  
56  
57  
58  
59  
60

1  
2  
3 Overall, we found that graduates were proportionally less likely to receive an offer than non-  
4 graduate applicants, and those graduates who were offered places had significantly higher UKCAT  
5 scores than their non-graduate equivalents. We know from earlier studies<sup>29</sup> and contemporary  
6 routine data that the average competition, or selection, ratios for GEM programmes are significantly  
7 higher than for traditional five-year programmes. GEM selection processes also tend to place more  
8 weight on UKCAT performance than do traditional programmes typically (this is associated with  
9 school leaving examinations being potentially less discriminatory for graduates - who would have  
10 taken these exams in earlier years, when it was less common to achieve top grades<sup>39</sup>). These factors  
11 may explain this outcome. However, future research which compares selection ratios for non-  
12 graduates and graduates by programme would provide a more nuanced understanding of  
13 differences across groups. Additionally, future studies could also look more closely at graduate and  
14 non-graduate patterns of performance in the various stages of medical school selection for the high  
15 number of graduates applying to traditional programmes. For example, we do not know whether  
16 graduates and non-graduates with equivalent grades and UKCAT scores are invited to interview,  
17 then graduates “fall down” at that stage. These studies would address concerns in the wider  
18 education literature that graduates and non-graduates are judged differently.<sup>40</sup>

19  
20 The present study has various limitations that must be taken into consideration when interpreting  
21 findings. It was not possible to compare prior attainment across graduate and non-graduate groups  
22 with any confidence in this study because of the different weightings given to school and degree  
23 qualifications. However, this is a tricky comparison at the best of times. Graduates by their very  
24 nature have taken the school leaving exams which are typically used in medical selection to indicate  
25 prior attainment some years previous to their non-graduate counterparts. The issue of comparing  
26 “apples and pears” arises as over recent years the average A level score has progressively risen  
27 (“grade inflation”).<sup>39,41,42</sup>

28  
29 In conclusion, the aim of diversifying the medical student population on socio-economic grounds by  
30 attracting graduates has not been successful. It may be that to draw a more diverse group of  
31 graduates into medicine requires different selection criteria for this group, one that places  
32 appreciable weight on the degree qualification and other graduate attributes, such as experience  
33 and passion for medicine. However, to change the selection process of graduates or indeed any  
34 group requires a shift towards affirmative action and/or a commitment to increase diversity. There  
35 appears to be little appetite for the former in the UK even though there is some evidence from other  
36 contexts that students from minority populations enrich the teaching environment of a medical  
37 school and may be more likely to practice in underserved areas.<sup>43-45</sup>

### **Contributions**

We thank UKCAT for releasing the data for this project via a competitive bid process. We are also grateful to Dr Sally Curtis (University of Southampton) for the general advice throughout the project.

### **COMPETING INTERESTS AND FUNDING**

This study is part of Ben Kumwenda's doctoral programme of research funded by the UKCAT Research Panel, of which JC is a member and RG the Administrator.

### **ETHICAL PERMISSION**

The Chair of the local ethics committee ruled that formal ethical approval was not required for this study given the fully anonymised data was held in safe haven and all students who sit UKCAT are informed that their data and results will be used in educational research.

### **AUTHOR CONTRIBUTIONS**

RMck led the funding bid which was co-written by JC and GP, and reviewed by RG. RG advised on the nature of the data. BK managed the data, and planned and carried out the data analysis under the supervision of GP. JC guided the first draft of the introduction and discussion sections of this paper. BK and GP wrote the first drafts of the methods and results sections. JC edited the drafts. All authors reviewed and agreed the final draft of the paper.

### **DATA SHARING**

No additional data available as datasets held in safe haven.

1  
2  
3  
4  
5  
6  
7  
8  
9  
10  
11  
12  
13  
14  
15  
16  
17  
18  
19  
20  
21  
22  
23  
24  
25  
26  
27  
28  
29  
30  
31  
32  
33  
34  
35  
36  
37  
38  
39  
40  
41  
42  
43  
44  
45  
46  
47  
48  
49  
50  
51  
52  
53  
54  
55  
56  
57  
58  
59  
60

For peer review only

**REFERENCES**

1. Castillo-Page L. Diversity in Medical Education: Facts & Figures. Washington DC: Association of American Medical Colleges; 2012.
2. Milburn A. University Challenge: How Higher Education Can Advance Social Mobility. London: Cabinet Office; 2012.
3. Cleland J, Dowell J, McLachlan J, Nicholson S, Patterson F. Identifying best practice in the selection of medical students: A project commissioned by the General Medical Council; 2012.
4. Larkins S, Michielsen K, Iputo J, et al. Impact of selection strategies on representation of underserved populations and intention to practise: International findings. *Medical Education* 2015;49:60-72.
5. Behrendt. L, Larkin. S, Griew. R, Kelly. P. Review of Higher Education Access and Outcomes for Aboriginal and Torres Strait Islander People Final Report. Canberra, Australia: Australian Government Department of Education and Training; 2012.
6. Mathers J, Sitch A, Marsh JL, Parry J. Widening access to medical education for under-represented socioeconomic groups: population based cross sectional analysis of UK data, 2002-6. *British Medical Journal* 2011;342:7.
7. Griffin B, Hu W. The interaction of socio-economic status and gender in widening participation in medicine. *Medical education* 2015;49:103-13.
8. Steven K, Dowell J, Jackson C, Guthrie B. Fair access to medicine? Retrospective analysis of UK medical schools application data 2009-2012 using three measures of socioeconomic status. *Bmc Medical Education* 2016;16:10.
9. Nicholson S, Cleland JA. "It's making contacts": notions of social capital and implications for widening access to medical education. *Advances in Health Sciences Education* 2016:1-14.
10. Independent Reviewer on Social Mobility and Child Poverty. Fair Access to Professional Careers. London: Cabinet Office; 2012.
11. Medical Workforce Standing Advisory committee. Planning the Medical Workforce. Third Report. London: Department of Health; 1997.
12. Wilkinson TJ, Wells JE, Bushnell JA. Are differences between graduates and undergraduates in a medical course due to age or prior degree (vol 38, pg 1141, 2004). *Medical Education* 2005;39:1141-6.
13. Peile E, George C. Should all medical students be graduates first? *British Medical Journal* 2007;335:1072-3.
14. Carter YH, Peile E. Graduate entry medicine: high aspirations at birth. *Clinical Medicine* 2007;7:143-7.
15. Association. BM. Equality and Diversification in UK Medical Schools. London: BMA; 2009.
16. Dowell J, Norbury M, Steven K, Guthrie B. Widening access to medicine may improve general practitioner recruitment in deprived and rural communities: survey of GP origins and current place of work. *BMC Medical Education* 2015;15:165.
17. Puddey IB, Playford DE, Mercer A. Impact of medical student origins on the likelihood of ultimately practicing in areas of low vs high socio-economic status. *Bmc Medical Education* 2017;17:13.
18. GP Taskforce. Securing the future of GP workforce. Delivering the Mandate on GP Expansion. GP taskforce final report; 2014.
19. Cleland J, Johnston PW, French FH, Needham G. Associations between medical school and career preferences in Year 1 medical students in Scotland. *Medical Education* 2012;46:473-84.
20. Niven V, Cabot LB, Gallagher JE. Widening participation - a comparison of the characteristics of successful UK applicants to the five-year and four-year dental programmes in 2007 and 2008. *British Dental Journal* 2013;214:117-22.
21. James D, Ferguson E, Powis D, et al. Graduate entry to medicine: widening psychological diversity. *Bmc Medical Education* 2009;9:8.

22. Elliott SL, Epstein J. Selecting the future doctors: the role of graduate medical programmes. *Internal Medicine Journal* 2005;35:174-7.
23. Dodds AE, Reid KJ, Conn JJ, Elliott SL, McColl GJ. Comparing the academic performance of graduate- and undergraduate-entry medical students. *Medical Education* 2010;44:197-204.
24. Byrne AT, Arnett R, Farrell T, Sreenan S. Comparison of performance in a four year graduate entry medical programme and a traditional five/six year programme. *Bmc Medical Education* 2014;14.
25. Casey D, Thomas S, Hocking DR, Kemp-Casey A. Graduate-entry medical students: older and wiser but not less distressed. *Australasian Psychiatry* 2016;24:88-92.
26. Calvert MJ, Ross NM, Freemantle N, Xu Y, Zvauya R, Parle JV. Examination performance of graduate entry medical students compared with mainstream students. *Journal of the Royal Society of Medicine* 2009;102:425-30.
27. Les B, Howard S. *Education Policy: Process, Themes and Impact*. New York: Routledge; 2006.
28. Rolfe IE, Ringland C, Pearson SA. Graduate entry to medical school? Testing some assumptions. *Medical Education* 2004;38:778-86.
29. Garrud P. Who applies and who gets admitted to UK graduate entry medicine? - an analysis of UK admission statistics. *Bmc Medical Education* 2011;11:4.
30. Medschoolsonline. at [http://www.medschoolsonline.co.uk/graduate-entry-programme/.](http://www.medschoolsonline.co.uk/graduate-entry-programme/))
31. HIC Safe Haven. Health Informatics Centre. 2016, at
32. Do P, Parry J, Mathers J, Richardson M. Monitoring the widening participation initiative for access to medical school: are present measures sufficient? *Medical education* 2006;40:750-8.
33. Hoare A, Johnston R. Widening participation through admissions policy - a British case study of school and university performance. *Studies in Higher Education* 2011;36:21-41.
34. Boliver V, Gorard S, Siddiqui N. Will the Use of Contextual Indicators Make UK Higher Education Admissions Fairer? *Education Sciences* 2015;5:306.
35. MacKenzie RK, Dowell J, Ayansina D, Cleland JA. Do personality traits assessed on medical school admission predict exit performance? A UK-wide longitudinal cohort study. *Advances in Health Sciences Education* 2016:1-21.
36. James D, Ferguson E, Powis D, Symonds I, Yates J. Graduate entry to medicine: widening academic and socio-demographic access. *Medical Education* 2008;42:294-300.
37. Gorard S, Adnett N, May H, Slack K, Smith E, Thomas L. *Overcoming the barriers to higher education*. Stoke-on-Trent: Trentham Books; 2007.
38. Harrison N, Hatt S. Knowing the 'unknowns': investigating the students whose social class is not known at entry to higher education. *Journal of Further and Higher Education* 2009;33:347-57.
39. McManus IC, Powis DA, Wakeford R, Ferguson E, James D, Richards P. Intellectual aptitude tests and A levels for selecting UK school leaver entrants for medical school. *British Medical Journal* 2005;331:555-9.
40. Blackstone T. Does Maturity Make a Difference? *RESEARCH REPORT-POLICY STUDIES INSTITUTE* 1997:38-45.
41. James D, Yates J, Nicholson S. Comparison of A level and UKCAT performance in students applying to UK medical and dental schools in 2006: cohort study. *British Medical Journal* 2010;340:7.
42. Johnes. G. Standards and grade inflation. In: Johnes. G, Johnes. J, eds. *International Handbook on the Economics of Education*. Cheltenham: Edward Elgar Publishing Ltd; 2004.
43. Xu G, Fields SK, Laine C, Veloski JJ, Barzansky B, Martini CJ. The relationship between the race/ethnicity of generalist physicians and their care for underserved populations. *American Journal of Public Health* 1997;87:817-22.
44. Whitla DK, Orfield G, Silen W, Teperow C, Howard C, Reede J. Educational benefits of diversity in medical school: A survey of students. *Academic Medicine* 2003;78:460-6.



45. Saha S, Guiton G, Wimmers PF, Wilkerson L. Student body racial and ethnic composition and diversity-related outcomes in US medical schools. *Jama-Journal of the American Medical Association* 2008;300:1135-45.

**Table 1: Frequency distribution of applicants (and offers) to UKCAT consortium medical schools between 2006 - 2014**

|                                    |                                             | Non-graduate |      |       |      | Graduate    |      |       |      |
|------------------------------------|---------------------------------------------|--------------|------|-------|------|-------------|------|-------|------|
|                                    |                                             | Application  |      | Offer |      | Application |      | Offer |      |
|                                    |                                             | n            | %    | n     | %    | n           | %    | n     | %    |
| <b>Gender</b>                      |                                             |              |      |       |      |             |      |       |      |
|                                    | Female                                      | 49082        | 55.9 | 22716 | 56.2 | 13999       | 57.7 | 3812  | 56.7 |
|                                    | Male                                        | 38656        | 44.1 | 17702 | 43.8 | 10256       | 42.3 | 2910  | 43.3 |
|                                    | Total                                       | 87738        |      | 40418 |      | 24255       |      | 6722  |      |
| <b>Ethnicity II</b>                |                                             |              |      |       |      |             |      |       |      |
|                                    | Caucasian                                   | 47103        | 61.9 | 25421 | 69.8 | 14014       | 64.3 | 4831  | 78.3 |
|                                    | Non-Caucasian                               | 28941        | 38.1 | 10995 | 30.2 | 7765        | 35.6 | 1335  | 21.7 |
|                                    | Total                                       | 76044        |      | 36416 |      | 21779       |      | 6166  |      |
| <b>School Attended<sup>†</sup></b> |                                             |              |      |       |      |             |      |       |      |
|                                    | Fee Paying                                  | 17388        | 25.5 | 10184 | 29.2 | 1672        | 21.1 | 664   | 24.5 |
|                                    | Non-Fee Paying                              | 50796        | 74.5 | 24705 | 70.8 | 6249        | 78.9 | 2043  | 75.5 |
|                                    | Total                                       | 68184        |      | 34889 |      | 7921        |      | 2707  |      |
| <b>IMD Quintile<sup>‡</sup></b>    |                                             |              |      |       |      |             |      |       |      |
|                                    | 1                                           | 28518        | 34.6 | 14043 | 40   | 5972        | 26.2 | 1894  | 32   |
|                                    | 2                                           | 19202        | 23.3 | 8767  | 25   | 4693        | 20.6 | 1375  | 23.2 |
|                                    | 3                                           | 14986        | 18.2 | 6196  | 17.6 | 4450        | 19.6 | 1134  | 19.2 |
|                                    | 4                                           | 10883        | 13.2 | 3734  | 10.6 | 4261        | 18.7 | 959   | 16.2 |
|                                    | 5                                           | 8815         | 10.7 | 2394  | 6.8  | 3378        | 14.8 | 552   | 9.3  |
|                                    | Total                                       | 82404        |      | 35134 |      | 22754       |      | 5914  |      |
| <b>NS_SEC<sup>‡</sup></b>          |                                             |              |      |       |      |             |      |       |      |
|                                    | Managerial and Professional Occupations     | 61624        | 84.1 | 28025 | 87.9 | 15622       | 78.7 | 4406  | 83.3 |
|                                    | Intermediate Occupations                    | 3399         | 4.6  | 1337  | 4.2  | 1167        | 5.9  | 295   | 5.6  |
|                                    | Small Employers and Own Account Occupations | 4676         | 6.4  | 1501  | 4.7  | 1572        | 7.9  | 313   | 5.9  |
|                                    | Lower Supervisory and Technical Occupations | 1410         | 1.9  | 423   | 1.3  | 639         | 3.2  | 129   | 2.4  |
|                                    | Routine and Semi-Routine Occupations        | 2198         | 3    | 580   | 1.8  | 848         | 4.3  | 149   | 2.8  |
|                                    | Total                                       | 73307        |      | 31866 |      | 19848       |      | 5292  |      |
| <b>Domicile</b>                    |                                             |              |      |       |      |             |      |       |      |
|                                    | UK                                          | 70447        | 80.3 | 35333 | 88   | 20909       | 86.2 | 6051  | 90   |
|                                    | EU                                          | 6694         | 7.6  | 1078  | 2.7  | 1467        | 6    | 280   | 4.2  |
|                                    | International                               | 10597        | 12.1 | 3785  | 9.4  | 1879        | 7.7  | 391   | 5.8  |
|                                    | Total                                       | 87738        |      | 40418 |      | 24255       |      | 6722  |      |
| <b>UKCAT Attempt Number</b>        |                                             |              |      |       |      |             |      |       |      |
|                                    | 1                                           | 75049        | 85.5 | 34770 | 86   | 15562       | 64.2 | 4718  | 70.2 |
|                                    | 2                                           | 11803        | 13.5 | 5390  | 13.3 | 5722        | 23.6 | 1425  | 21.2 |
|                                    | 3+                                          | 886          | 1    | 258   | 0.6  | 2971        | 12.2 | 579   | 8.6  |
|                                    | Total                                       | 87738        |      | 40418 |      | 24255       |      | 6722  |      |
| <b>Final Outcome</b>               |                                             |              |      |       |      |             |      |       |      |
|                                    | No Offer                                    | 43964        | 52.1 |       |      | 14736       | 68.7 |       |      |
|                                    | Offer                                       | 40418        | 47.9 | 40418 |      | 6722        | 27.7 | 6722  |      |

|                                                  |       |  |  |       |  |  |
|--------------------------------------------------|-------|--|--|-------|--|--|
| Total                                            | 87738 |  |  | 24255 |  |  |
| ‡ Sample drawn from UK domiciled applicants only |       |  |  |       |  |  |

| Table 2                                     |       | Mean UKCAT Scores <sup>‡</sup> |       |        |         |          |        |        |         |
|---------------------------------------------|-------|--------------------------------|-------|--------|---------|----------|--------|--------|---------|
|                                             |       | Non-graduate                   |       |        |         | Graduate |        |        |         |
|                                             |       | N                              | Mean  | SD     | P value | N        | Mean   | SD     | P value |
| <b>Gender</b>                               |       |                                |       |        |         |          |        |        |         |
| Female                                      | 49047 | 2532.2                         | 269.8 | <0.001 | 13974   | 2501.7   | 285.71 | <0.001 |         |
| Male                                        | 38633 | 2581.8                         | 267.7 |        | 10241   | 2550.9   | 291.22 |        |         |
| <b>Ethnicity</b>                            |       |                                |       |        |         |          |        |        |         |
| Caucasian                                   | 47102 | 2597.9                         | 243.6 | <0.001 | 14000   | 2591.2   | 261.15 | <0.001 |         |
| Non-Caucasian                               | 26298 | 2512.1                         | 282.0 |        | 7128    | 2402.3   | 294.32 |        |         |
| <b>School Attended</b>                      |       |                                |       |        |         |          |        |        |         |
| Fee Paying                                  | 17388 | 2632.5                         | 239.2 | <0.001 | 1670    | 2611.6   | 233.21 | <0.001 |         |
| Non-Fee Paying                              | 50787 | 2562.8                         | 260.0 |        | 6233    | 2527.2   | 265.93 |        |         |
| <b>IMD Quintile</b>                         |       |                                |       |        |         |          |        |        |         |
| I                                           | 24427 | 2627.9                         | 237.8 | <0.001 | 5395    | 2600.4   | 263.94 | <0.001 |         |
| II                                          | 16291 | 2604.6                         | 244.6 |        | 4206    | 2578.1   | 269.33 |        |         |
| III                                         | 12505 | 2576.7                         | 253.6 |        | 3937    | 2531.5   | 273.30 |        |         |
| IV                                          | 8936  | 2516.6                         | 269.3 |        | 3801    | 2479.3   | 298.79 |        |         |
| V                                           | 7194  | 2425.9                         | 282.8 |        | 2990    | 2397.5   | 312.92 |        |         |
| <b>NSSEC [UK Only]</b>                      |       |                                |       |        |         |          |        |        |         |
| Managerial and Professional Occupations     | 52555 | 2604.1                         | 249.0 | <0.001 | 14084   | 2560.6   | 281.44 | <0.001 |         |
| Intermediate Occupations                    | 2784  | 2568.7                         | 246.3 |        | 1059    | 2541.3   | 272.21 |        |         |
| Small Employers and Own Account Occupations | 3635  | 2518.8                         | 256.5 |        | 1367    | 2466.0   | 279.27 |        |         |
| Lower Supervisory and Technical Occupations | 1181  | 2486.6                         | 259.5 |        | 551     | 2448.9   | 296.20 |        |         |
| Routine and Semi-Routine Occupations        | 1775  | 2465.0                         | 270.2 |        | 740     | 2441.2   | 276.38 |        |         |
| <b>Number of attempts</b>                   |       |                                |       |        |         |          |        |        |         |
| 1                                           | 75000 | 2541.7                         | 272.9 | <0.001 | 15554   | 2507.5   | 299.42 | <0.001 |         |
| 2                                           | 11798 | 2628.4                         | 237.9 |        | 5711    | 2552.7   | 273.84 |        |         |
| 3 or more                                   | 882   | 2604.4                         | 256.0 |        | 2950    | 2543.5   | 254.43 |        |         |
| <b>Final Outcome</b>                        |       |                                |       |        |         |          |        |        |         |
| No offer                                    | 43925 | 2455.6                         | 265.2 | <0.001 | 14713   | 2443.9   | 278.01 | <0.001 |         |
| Offer                                       | 40405 | 2657.7                         | 235.3 |        | 6711    | 2697.7   | 244.39 |        |         |

<sup>‡</sup> The numbers presented here are the mean scores based on the applicants' last UKCAT sitting. However, the figure differences (to those in table 1) is because some applicants had a missing UKCAT outcome

1  
2  
3  
4  
5  
6  
7  
8  
9  
10  
11  
12  
13  
14  
15  
16  
17  
18  
19  
20  
21  
22  
23  
24  
25  
26  
27  
28  
29  
30  
31  
32  
33  
34  
35  
36  
37  
38  
39  
40  
41  
42  
43  
44  
45  
46  
47  
48  
49  
50  
51  
52  
53  
54  
55  
56  
57  
58  
59  
60

Odds of an application resulting in offer of a place according to selected sociodemographic characteristics,

For peer review only

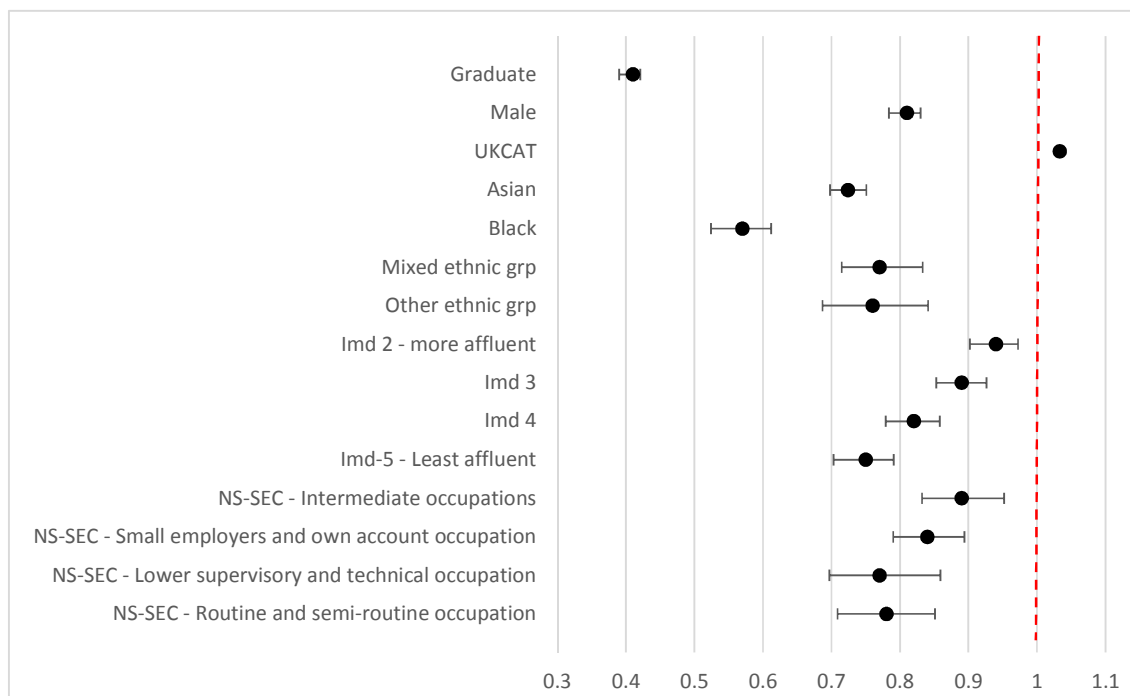

Figure1: Odds Ratio, Final Model

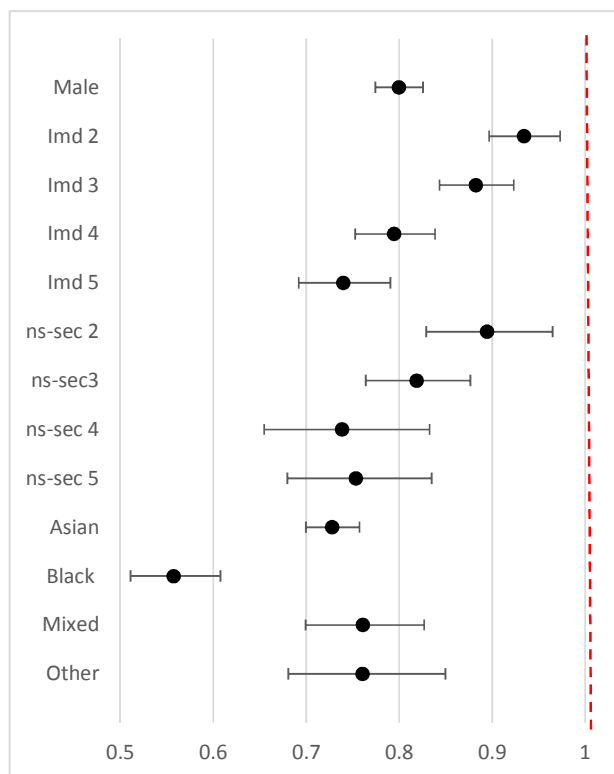

Figure 2: Odds Ratio, Non-graduate Applicants

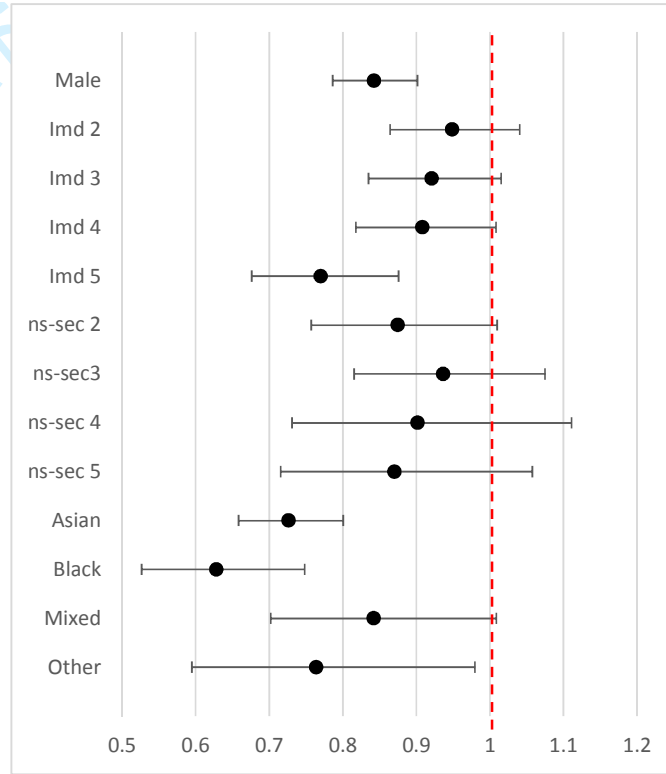

Figure3: Odds Ratio, Graduate Applicants

1  
2  
3  
4  
5  
6  
7  
8  
9  
10  
11  
12  
13  
14  
15  
16  
17  
18  
19  
20  
21  
22  
23  
24  
25  
26  
27  
28  
29  
30  
31  
32  
33  
34  
35  
36  
37  
38  
39  
40  
41  
42  
43  
44  
45  
46  
47  
48  
49  
50  
51  
52  
53  
54  
55  
56  
57  
58  
59  
60

For peer review only

**Table 3: Multiple logistic regression for offers to medical school 2007 - 2014**

|                                                        |                                                           | Model 1, $R^2=0.22$ , |       |       | Model 2, $R^2=0.21$ |       |       | Model 3, $R^2=0.23$ |       |       | Model 4 $R^2=0.23$ |       |       |
|--------------------------------------------------------|-----------------------------------------------------------|-----------------------|-------|-------|---------------------|-------|-------|---------------------|-------|-------|--------------------|-------|-------|
|                                                        |                                                           | OR                    | Lower | Upper | OR                  | Lower | Upper | OR                  | Lower | Upper | OR                 | Lower | Upper |
| UKCAT                                                  |                                                           | 1.03                  | 1.033 | 1.034 | 1.03                | 1.033 | 1.034 | 1.03                | 1.033 | 1.034 | 1.03               | 1.033 | 1.034 |
| Graduate Status                                        | Non-graduate (default)                                    | 1                     |       |       | 1                   |       |       | 1                   |       |       | 1                  |       |       |
|                                                        | Graduate                                                  | 0.44                  | 0.429 | 0.460 | 0.40                | 0.383 | 0.416 | 0.40                | 0.385 | .420  | 0.40               | 0.390 | 0.421 |
| Gender                                                 | Female (default)                                          | 1                     |       |       | 1                   |       |       | 1                   |       |       |                    |       |       |
|                                                        | Male                                                      | 0.81                  | 0.784 | 0.830 | 0.81                | 0.784 | 0.830 | 0.81                | 0.784 | 0.831 | 0.81               | 0.784 | 0.830 |
| Ethnicity                                              | White (default)                                           | 1                     |       |       | 1                   |       |       | 1                   |       |       | 1                  |       |       |
|                                                        | Asian                                                     | 0.73                  | 0.698 | 0.752 | 0.73                | 0.698 | 0.751 | 0.72                | 0.695 | 0.752 | 0.72               | 0.698 | 0.751 |
|                                                        | Black                                                     | 0.57                  | 0.524 | 0.613 | 0.57                | 0.524 | 0.612 | 0.56                | 0.513 | 0.610 | 0.57               | 0.524 | 0.612 |
|                                                        | Mixed                                                     | 0.77                  | 0.715 | 0.833 | 0.77                | 0.715 | 0.833 | 0.76                | 0.697 | 0.825 | 0.77               | 0.715 | 0.833 |
|                                                        | Other                                                     | 0.76                  | 0.687 | 0.842 | 0.76                | 0.687 | 0.841 | 0.76                | 0.681 | 0.851 | 0.76               | 0.687 | 0.841 |
| Index of Multiple Deprivation (IMD)                    | I = Most affluent (default)                               | 1                     |       |       | 1                   |       |       | 1                   |       |       | 1                  |       |       |
|                                                        | II                                                        | 0.93                  | 0.897 | 0.973 | 0.94                | 0.902 | 0.972 | 0.94                | 0.902 | 0.972 | 0.94               | 0.902 | 0.972 |
|                                                        | III                                                       | 0.88                  | 0.844 | 0.923 | 0.89                | 0.853 | 0.926 | 0.87                | 0.853 | 0.926 | 0.89               | 0.853 | 0.926 |
|                                                        | IV                                                        | 0.80                  | 0.753 | 0.839 | 0.82                | 0.780 | 0.859 | 0.82                | 0.779 | 0.858 | 0.82               | 0.779 | 0.858 |
|                                                        | V - Least affluent                                        | 0.74                  | 0.693 | 0.791 | 0.75                | 0.704 | 0.792 | 0.75                | 0.703 | 0.791 | 0.75               | 0.703 | 0.791 |
| Parental Occupation NS-SEC                             | 1 - Managerial and Professional Occupations (default)     | 1                     |       |       | 1                   |       |       | 1                   |       |       | 1                  |       |       |
|                                                        | II - Intermediate Occupations                             | 0.89                  | 0.833 | 0.952 | 0.89                | 0.828 | 0.964 | 0.89                | 0.833 | 0.952 | 0.89               | 0.832 | 0.952 |
|                                                        | III - Small Employers and Own Account Occupations         | 0.84                  | 0.791 | 0.894 | 0.82                | 0.767 | 0.880 | 0.84                | 0.790 | 0.894 | 0.84               | 0.790 | 0.894 |
|                                                        | IV - Lower Supervisory and Technical Occupations          | 0.77                  | 0.697 | 0.859 | 0.74                | 0.655 | 0.834 | 0.77                | 0.697 | 0.859 | 0.77               | 0.697 | 0.859 |
|                                                        | V - Routine and Semi-Routine Occupations                  | 0.78                  | 0.710 | 0.852 | 0.75                | 0.680 | 0.836 | 0.76                | 0.709 | 0.851 | 0.78               | 0.709 | 0.851 |
| Graduate status by Index of multiple deprivation (IMD) | Graduate-by-IMD I - Most affluent neighbourhood (default) | 1                     |       |       |                     |       |       |                     |       |       |                    |       |       |
|                                                        | Graduate vs IMD_II                                        | 1.02                  | 0.919 | 1.123 |                     |       |       |                     |       |       |                    |       |       |
|                                                        | Graduate vs IMD_III                                       | 1.04                  | 0.935 | 1.156 |                     |       |       |                     |       |       |                    |       |       |
|                                                        | Graduate vs IMD_IV                                        | 1.14                  | 1.017 | 1.278 |                     |       |       |                     |       |       |                    |       |       |
|                                                        | Graduate vs IMD_V - Least affluent neighbourhood          | 1.04                  | 0.907 | 1.196 |                     |       |       |                     |       |       |                    |       |       |
| p=0.25                                                 |                                                           |                       |       |       |                     |       |       |                     |       |       |                    |       |       |
| Graduate status                                        | Graduate-by-NS-SEC - I (default)                          |                       |       |       | 1                   |       |       |                     |       |       |                    |       |       |



**STROBE 2007 (v4) Statement—Checklist of items that should be included in reports of *cohort studies***

| Section/Topic                | Item # | Recommendation                                                                                                                                                                       | Reported on page # |
|------------------------------|--------|--------------------------------------------------------------------------------------------------------------------------------------------------------------------------------------|--------------------|
| Title and abstract           | 1      | (a) Indicate the study's design with a commonly used term in the title or the abstract                                                                                               | 1                  |
|                              |        | (b) Provide in the abstract an informative and balanced summary of what was done and what was found                                                                                  | 2                  |
| <b>Introduction</b>          |        |                                                                                                                                                                                      |                    |
| Background/rationale         | 2      | Explain the scientific background and rationale for the investigation being reported                                                                                                 | 3 - 4              |
| Objectives                   | 3      | State specific objectives, including any prespecified hypotheses                                                                                                                     | 3 - 4              |
| <b>Methods</b>               |        |                                                                                                                                                                                      |                    |
| Study design                 | 4      | Present key elements of study design early in the paper                                                                                                                              | 5                  |
| Setting                      | 5      | Describe the setting, locations, and relevant dates, including periods of recruitment, exposure, follow-up, and data collection                                                      | 5 - 6              |
| Participants                 | 6      | (a) Give the eligibility criteria, and the sources and methods of selection of participants. Describe methods of follow-up                                                           | 5                  |
|                              |        | (b) For matched studies, give matching criteria and number of exposed and unexposed                                                                                                  | n/a                |
| Variables                    | 7      | Clearly define all outcomes, exposures, predictors, potential confounders, and effect modifiers. Give diagnostic criteria, if applicable                                             | 6                  |
| Data sources/<br>measurement | 8*     | For each variable of interest, give sources of data and details of methods of assessment (measurement). Describe comparability of assessment methods if there is more than one group | n/a                |
| Bias                         | 9      | Describe any efforts to address potential sources of bias                                                                                                                            | 6                  |
| Study size                   | 10     | Explain how the study size was arrived at                                                                                                                                            | 5                  |
| Quantitative variables       | 11     | Explain how quantitative variables were handled in the analyses. If applicable, describe which groupings were chosen and why                                                         | 6                  |
| Statistical methods          | 12     | (a) Describe all statistical methods, including those used to control for confounding                                                                                                | 6 - 7              |
|                              |        | (b) Describe any methods used to examine subgroups and interactions                                                                                                                  | 8                  |
|                              |        | (c) Explain how missing data were addressed                                                                                                                                          | 6                  |
|                              |        | (d) If applicable, explain how loss to follow-up was addressed                                                                                                                       | n/a                |
|                              |        | (e) Describe any sensitivity analyses                                                                                                                                                | n/a                |
| <b>Results</b>               |        |                                                                                                                                                                                      |                    |



|                          |     |                                                                                                                                                                                                              |        |
|--------------------------|-----|--------------------------------------------------------------------------------------------------------------------------------------------------------------------------------------------------------------|--------|
| Participants             | 13* | (a) Report numbers of individuals at each stage of study—eg numbers potentially eligible, examined for eligibility, confirmed eligible, included in the study, completing follow-up, and analysed            | n/a    |
|                          |     | (b) Give reasons for non-participation at each stage                                                                                                                                                         | n/a    |
|                          |     | (c) Consider use of a flow diagram                                                                                                                                                                           | n/a    |
| Descriptive data         | 14* | (a) Give characteristics of study participants (eg demographic, clinical, social) and information on exposures and potential confounders                                                                     | 8 - 9  |
|                          |     | (b) Indicate number of participants with missing data for each variable of interest                                                                                                                          | 15     |
|                          |     | (c) Summarise follow-up time (eg, average and total amount)                                                                                                                                                  | n/a    |
| Outcome data             | 15* | Report numbers of outcome events or summary measures over time                                                                                                                                               | n/a    |
| Main results             | 16  | (a) Give unadjusted estimates and, if applicable, confounder-adjusted estimates and their precision (eg, 95% confidence interval). Make clear which confounders were adjusted for and why they were included | 17     |
|                          |     | (b) Report category boundaries when continuous variables were categorized                                                                                                                                    | n/a    |
|                          |     | (c) If relevant, consider translating estimates of relative risk into absolute risk for a meaningful time period                                                                                             | n/a    |
| Other analyses           | 17  | Report other analyses done—eg analyses of subgroups and interactions, and sensitivity analyses                                                                                                               | 8      |
| <b>Discussion</b>        |     |                                                                                                                                                                                                              |        |
| Key results              | 18  | Summarise key results with reference to study objectives                                                                                                                                                     | 9 - 10 |
| <b>Limitations</b>       |     |                                                                                                                                                                                                              |        |
| Interpretation           | 20  | Give a cautious overall interpretation of results considering objectives, limitations, multiplicity of analyses, results from similar studies, and other relevant evidence                                   | 10     |
| Generalisability         | 21  | Discuss the generalisability (external validity) of the study results                                                                                                                                        | 10     |
| <b>Other information</b> |     |                                                                                                                                                                                                              |        |
| Funding                  | 22  | Give the source of funding and the role of the funders for the present study and, if applicable, for the original study on which the present article is based                                                | 11     |

\*Give information separately for cases and controls in case-control studies and, if applicable, for exposed and unexposed groups in cohort and cross-sectional studies.

**Note:** An Explanation and Elaboration article discusses each checklist item and gives methodological background and published examples of transparent reporting. The STROBE checklist is best used in conjunction with this article (freely available on the Web sites of PLoS Medicine at <http://www.plosmedicine.org/>, Annals of Internal Medicine at <http://www.annals.org/>, and Epidemiology at <http://www.epidem.com/>). Information on the STROBE Initiative is available at [www.strobe-statement.org](http://www.strobe-statement.org).

# BMJ Open

## Are efforts to attract graduate applicants to UK medical schools effective in widening access? A national cohort study

|                                 |                                                                                                                                                                                                                                                                                                                                                                                                                                                                                                                                                                                                                |
|---------------------------------|----------------------------------------------------------------------------------------------------------------------------------------------------------------------------------------------------------------------------------------------------------------------------------------------------------------------------------------------------------------------------------------------------------------------------------------------------------------------------------------------------------------------------------------------------------------------------------------------------------------|
| Journal:                        | <i>BMJ Open</i>                                                                                                                                                                                                                                                                                                                                                                                                                                                                                                                                                                                                |
| Manuscript ID                   | bmjopen-2017-018946.R1                                                                                                                                                                                                                                                                                                                                                                                                                                                                                                                                                                                         |
| Article Type:                   | Research                                                                                                                                                                                                                                                                                                                                                                                                                                                                                                                                                                                                       |
| Date Submitted by the Author:   | 14-Sep-2017                                                                                                                                                                                                                                                                                                                                                                                                                                                                                                                                                                                                    |
| Complete List of Authors:       | Kumwenda, Ben; University of Aberdeen, Centre for Healthcare Education Research and Innovation, School of Medicine, Medical Sciences and Nutrition<br>Cleland, Jennifer; University of Aberdeen, Centre for Healthcare Education Research and Innovation; University of Aberdeen, School of Medicine, Medical Sciences and Nutrition<br>Greatrix, Rachel; University of Nottingham School of Medicine<br>MacKenzie, Rhoda; University of Aberdeen School of Medicine and Dentistry, Institute of Education in Medical and Dental Sciences<br>Prescott, Gordon; University of Aberdeen, Medical Statistics Team |
| <b>Primary Subject Heading</b>: | Medical education and training                                                                                                                                                                                                                                                                                                                                                                                                                                                                                                                                                                                 |
| Secondary Subject Heading:      | Medical education and training                                                                                                                                                                                                                                                                                                                                                                                                                                                                                                                                                                                 |
| Keywords:                       | Medical school admissions, Graduates, UKCAT, Widening access, Statistical analysis                                                                                                                                                                                                                                                                                                                                                                                                                                                                                                                             |
|                                 |                                                                                                                                                                                                                                                                                                                                                                                                                                                                                                                                                                                                                |

SCHOLARONE™  
Manuscripts

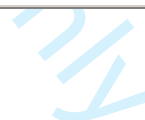

1  
2  
3 **Are efforts to attract graduate applicants to UK medical schools effective in widening**  
4 **access? A national cohort study**  
5

6 Kumwenda B<sup>1</sup>, Cleland JA<sup>1</sup>, Greatrix R<sup>2</sup>, Mackenzie RK<sup>1</sup>, Prescott GJ<sup>3</sup>  
7  
8

9 <sup>1</sup> Centre for Healthcare Education Research and Innovation, Institute of Education for Medical and  
10 Dental Sciences, School of Medicine, Medical Sciences & Nutrition, University of Aberdeen, UK

11 <sup>2</sup> UKCAT Consortium, <https://www.ukcat.ac.uk/>  
12

13 <sup>3</sup> Medical Statistics Team, School of Medicine, Medical Sciences & Nutrition, University of Aberdeen,  
14 UK  
15

16  
17  
18  
19  
20 Corresponding author:

21 Ben Kumwenda

22 Centre for Healthcare Education Research and Innovation

23 Institute of Education for Medical and Dental Sciences,

24 Polwarth Building,

25 University of Aberdeen,

26 Foresterhill,

27 Aberdeen, UK

28 AB25 2ZD

29 Email: [r01bk15@abdn.ac.uk](mailto:r01bk15@abdn.ac.uk)

30 Tel: 01224437090  
31  
32  
33  
34  
35  
36  
37  
38

39 Keywords:

40 Medical admissions, Graduate, UKCAT, admissions, widening access, statistical analysis.  
41  
42  
43  
44  
45  
46  
47  
48  
49  
50  
51  
52  
53  
54  
55  
56  
57  
58  
59  
60

## ABSTRACT

### Introduction

Attracting graduates was recommended as a means of diversifying the UK medical student population. Graduates now make up nearly a quarter of the total medical student population. Research to date has focused on comparing the socio-demographic characteristics of applicants to and/or students on traditional and graduate entry programmes (GEMs), yet GEMs account for only 40% of the graduate medical student population. Thus, we aimed to compare the socio-demographic characteristic and outcomes of graduates and non-graduate applicants across a range of programmes.

### Methods

This was an observational study of 117214 applicants to medicine who took the UKCAT from 2006 to 2014, and who applied to medical school through UCAS. We included applicant demographics, UKCAT total score and offers in our analysis. Applicants were assigned as graduates or non-graduates on the basis of their highest qualification. Multiple logistic regression was used to predict the odds of receiving an offer, after adjusting for confounders.

### Results

Irrespective of graduate or non-graduate status, most applicants were from the highest socio-economic groups and were from a white ethnic background. Receiving an offer was related to gender and ethnicity in both graduates and non-graduates. After adjusting for UKCAT score, the odds ratio of an offer for graduates vs. non-graduates was approximately 0.5 (OR=0.48, 95% CI 0.46-0.49).

### Discussion

Our findings indicate that the aim of diversifying the medical student population on socio-economic grounds by attracting graduates has been only marginally successful. Different approaches must be considered if medicine is to attract and select more socially diverse applicants.

*249 words*

**Strength and limitations of this study:**

- A large multi-cohort study to look at the population of graduate applicants to UK medical schools, including those on Graduate Entry Programme (GEM) and traditional programmes.
- The study uses a contemporary dataset to examine the socio-economic differences of those who apply to medical school; and it is important to know more about who *applies*, as medical schools can only select from the pool of applicants.
- The study examines what socio-demographic factors are associated with receiving an offer to study medicine, and whether these differ in graduates and non-graduates.
- Measures of socio-economic status are self-declared and there was a large proportion of missing socio-economic data for the graduate sub-group.
- Allocating students to an occupational group that depends on their family circumstances (area, parental occupation) can be problematic, especially for mature applicants.

**INTRODUCTION**

Despite much activity, investment and policy directives, people from backgrounds perceived as disadvantaged and minority, ethnic and cultural groups, remain under-represented, or excluded from medicine worldwide on the basis of, for example, their social class or ethnic origin.<sup>1-5</sup> In the UK, the vast majority of medical students come from the highest socio-economic groups<sup>6-9</sup>, and more than 20% of medical students have attended independent (usually fee paying) schools, compared to an average of 7% of all school pupils.<sup>10</sup> The professions have traditionally been dominated by those in high socioeconomic groups and this issue was summarised concisely in a report by the Independent Reviewer on Social Mobility and Child Poverty: 'Medicine . . . has a long way to go when it comes to making access fairer, diversifying its workforce and raising social mobility'.<sup>10</sup>

In the UK, most students enter medicine as school-leavers aged 17-20 years. In 1997, the UK Medical Workforce Standing Advisory Committee (MWSAC) recommended that one way of diversifying the medical student population was to attract graduates into medical schools.<sup>11</sup> The assumption behind this was that, by accepting students with more life experience, the diversity of students and hence doctors would be increased<sup>12-15</sup>, and this would result in more doctors willing to work in deprived and underserved areas.<sup>16-18</sup> This recommendation led to the introduction (in 2000) of the first four-year graduate entry medical courses (GEM), as well as a more general drive to encourage graduates into medicine.

1  
2  
3 Graduates now make up nearly a quarter of the contemporary UK medical student population.<sup>13,19</sup>  
4  
5 However, to date, there is relatively little information relating to whether, or not, attracting  
6 graduates has increased the diversity of medicine in the UK. Earlier studies tend to be single-site  
7 and/or focused on the relative performance of graduates versus school-leaver entrants.<sup>20-26</sup> In an  
8 exception to this, Mathers and colleagues carried out a large-scale study of applicants to 31 UK  
9 medical schools between 2002 and 2006 in order to determine whether the newly introduced GEM  
10 programmes had widened access to medicine.<sup>6</sup> They concluded that graduate entry programmes do  
11 attract more students from less affluent backgrounds than traditional five-year programmes but  
12 overall GEMs had not led to significant changes to the socio-economic profile of UK medical student  
13 population. It is possible, however, that this study was undertaken too soon after the establishment  
14 of the first GEM programmes to assess their true impact, given the typical time lag between policy  
15 implementation and impact on practice in education.<sup>27</sup>  
16  
17  
18  
19  
20  
21

22 Moreover, GEM programmes only account for about 10% of all medical programmes: there are more  
23 graduates in traditional five-year programmes than in GEM programmes. Yet, to the best of our  
24 knowledge, no previous studies have looked directly at the whole population of graduate medical  
25 students – that is, those on both GEM and traditional programmes.  
26  
27  
28

29 Finally, most studies have only looked at those graduates who were successful in obtaining a place at  
30 medical school.<sup>6,28</sup> It is also important to know more about who *applies*, as medical schools can only  
31 select from the pool of applicants.<sup>8</sup> In one of the few studies looking at both applicants and  
32 admissions, Garrud found some differences between both applicants and admissions to graduate-  
33 entry and traditional programmes, mostly in terms of ethnicity, but did not examine differences in  
34 terms of socio-economic markers.<sup>29</sup> This is, however, a complex area to investigate. There are issues  
35 surrounding these markers in graduate students, particularly given parental occupation is taken into  
36 account for school leavers, but occupation for graduates and older applicants may be that of the  
37 applicant themselves, particularly if they have been employed after leaving school or after a first  
38 degree. This ambiguity also holds for area of domicile (IMD: measured by postcode) as again that  
39 may be of the parental home or the home of the applicant for mature students and graduates.  
40 However, to attempt to address these gaps in the literature we used a contemporary dataset to  
41 compare the socio-demographic characteristics of graduates and non-graduate applicants to  
42 medicine. The main objective was to determine whether graduate and non-graduate applicants to  
43 medicine differ on a range of socio-demographic variables. Our second aim was to examine what  
44 socio-demographic factors are associated with receiving an offer to study medicine, and whether  
45 these differ in graduates and non-graduates.  
46  
47  
48  
49  
50  
51  
52  
53  
54  
55  
56  
57  
58  
59  
60

## METHODS

### Study context

Data were obtained from the UKCAT database which comprises data from two sources: UCAS and UKCAT (<http://www.ukcat.ac.uk/>). UKCAT is the UK Clinical Aptitude Test for applicants to medical and dental schools. UCAS is the Universities and Colleges Admissions Service, a UK-based organisation whose primary role is to operate the application process for British universities. Through the UCAS system (<https://www.ucas.com/>), candidates can apply to up to four medical courses out of five options in any one cycle, but there is no preference order of course choice. We compiled data for all candidates who sat the UKCAT between 2006 and 2014, and who applied to medical school through UCAS.

The UKCAT database only holds UCAS data relating to UKCAT candidates who have applied to a UKCAT University. Therefore, the data is a subset of graduate applicants to UK Universities. A number of graduate entry programmes use other admission tests (both BMAT and GAMSAT). Of the 16 graduate entry programmes in the UK, 7 require the UKCAT, 4 require GAMSAT, and one programme requires a BMAT.<sup>30</sup> The other four graduate entry programmes do not use any of these admission tests. Where UKCAT candidates have applied to non-UKCAT Universities these choices and the outcome of these choices are not known.

Although individuals can have multiple applications, within and between years, the socio-demographic variables presented in this study are per unique applicant. These variables include gender; ethnicity; domicile; secondary school attended, domicile (United Kingdom (UK), International, European Union (EU)). The socio-economic status (SES) of the candidates was determined by parental National Statistics Socio-Economic Classification (NS-SEC) and Index of Multiple Deprivation (IMD), an area-based measurement of material deprivation.

### Design and procedures

Access to the data was via a safe haven<sup>31</sup> (to ensure adherence to the highest standards of security, governance and confidentiality when storing, handling and analysing identifiable data). Ethical approval was not required because the focus of this study was a secondary analysis of anonymised data. Applicants who took the UK Clinical Aptitude Test (UKCAT) were notified that their data would be used for research purposes. Data files were merged into a single SPSS file for cleaning and

1  
2  
3 analysis. The online supplementary file 1 (*insert link supplementary file 1 here*) illustrates a flow  
4 diagram showing how the data files were merged from different source documents.  
5

6  
7 The applications were assigned into two categories; graduate or non-graduate at the time of  
8 application. This was primarily based on applicants' highest qualification but some amendments  
9 were necessary. For example, where this information was missing, we imputed the outcome variable  
10 based on applicants' age and programme applied. For instance, all applicants aged less than 20 on  
11 their final UKCAT attempt were assumed to have applied shortly after leaving school; these were  
12 classified as school-leavers, or non-graduate applicants. Similarly, applicants with missing  
13 information on academic qualification, aged over 21 and had applied for a graduate entry  
14 programme were classified as 'graduates'. The outcome measures were the UKCAT score, and  
15 whether the applicant received an offer or not. We also considered all conditional and unconditional  
16 offers as an 'offer'.  
17  
18  
19  
20  
21  
22  
23  
24  
25  
26

### 27 **Statistical analysis**

28  
29 All the data were analysed using SPSS (IBM SPSS Statistics for Windows Version 22.0. Armonk, NY:  
30 IBM Corp). The results are reported in terms of numbers, percentages and mean (standard  
31 deviation) or median (interquartile range) as appropriate. The UKCAT scores were normally  
32 distributed. Therefore we used independent-samples t-test to compare the means between two  
33 groups. One-way analysis of variance (ANOVA) was used to compare means between more than two  
34 independent groups. A binary logistic regression analysis was employed to predict the odds of  
35 getting an offer from an application based on an applicant's graduate status. The specific factors we  
36 adjusted for in the regression models were: socio-economic status (NS-SEC and IMD), gender,  
37 graduate status, ethnicity and the total UKCAT score. The purpose was to assess the odds of  
38 receiving an offer for a graduate relative to a non-graduate after accounting for any differences in  
39 total UKCAT score. The analysis considered only the final application of each applicant to ensure  
40 independence (i.e., to control for those who made repeated applications).  
41  
42  
43  
44  
45  
46  
47  
48  
49  
50  
51  
52  
53  
54  
55  
56  
57  
58  
59  
60



## RESULTS

From 2006 to 2014, the UKCAT database comprises 117214 applicants to medicine, applying through UCAS on a total of 146146 occasions (i.e. some applied in more than one cycle and hence sat the UKCAT more than once). The time-trend analysis shows that the proportion of graduate applicants to UK medical schools has risen from 8.5% in 2006 to 26.9% in 2013 (see supplementary file 2, time-trend analysis) (*insert link to supplementary file 2 here*). While dramatic, this increase is at least in part due to the increase in the number of institutions joining the UKCAT consortium, and thus more data supply. 23.6% of the applicants were graduates and 76.4% non-graduates. In general, there were more female graduate applicants than male applicants. The median age for the non-graduate applicants was 18 years and it was 23 years for the graduate applicants.

Table 1 summarises a comparison of graduate and non-graduate applicants by different sociodemographic factors. The main pattern across the two groups was that most applicants were from the highest socio-economic group, with nearly 80% of all applicants having a parent/guardian in the managerial and professional occupations. The groups were also similar in that one-fifth of the graduate and non-graduate applicants had attended a fee-paying (independent) school. (However, note that type of school was only available for one third of graduates and so this was not included in the later multivariable regression analysis with other covariates due to concern about bias and a lack of representativeness among graduates). The sample was predominantly of candidates from white ethnic backgrounds, for both graduates 64.3% (n=14014), and non-graduates 61.9% (n=47103). Around 7.7% of the graduates were classified as international applicants, as compared to 12.1% of the non-graduate applicants. The number of EU applicants was similar for both graduates (6.0%) and non-graduates (7.6%).

..... Table 1 about here.....

Non-graduate applicants performed significantly better on the UKCAT (2535.4 points, SD=268.2) than graduate applicants (2498.5 points, SD=285.7),  $p < 0.001$ . Graduates and non-graduate applicants from the top 20% affluent neighbourhoods (IMD 'I') obtained better UKCAT scores than applicants from the 20% most deprived areas (IMD 'V'). The difference was approximately 200 points for graduate applicants, and the same margin was observed in the non-graduate group. A similar pattern was also observed with parental occupation classification (NS-SEC) categories with

1  
2  
3 the difference of over 100 UKCAT points between managerial and professional occupations and  
4 routine/semi-routine occupations.  
5

6 The proportion of applicants who received offers was substantially lower for graduates (27.7%) than  
7 it was for non-graduates (47.9%). Graduate applicants who received offers had significantly better  
8 mean UKCAT scores (2697.7 points, SD=244.39) compared to their non-graduate colleagues who  
9 received offers (2657.7 points, SD=235.3),  $p < 0.001$ . The pre-admission attainment information  
10 (UKCAT scores) is summarised in Table 2.  
11  
12  
13  
14  
15

16  
17 ..... Table 2 about here.....  
18

19 A binary logistic regression analysis was employed to predict the odds of getting an offer based on  
20 the applicant's highest qualification (graduate or not) and total UKCAT score. After adjusting for  
21 UKCAT score alone, the odds ratio of an offer for graduates vs. non-graduates was approximately 0.5  
22 (OR=0.48, 95% CI 0.46-0.49).  
23  
24  
25  
26

27 Several variables that were considered to be representative of widening participation (WP)  
28 backgrounds were included in univariate analyses. The multiple logistic regression analysis was  
29 repeated including, in addition to UKCAT and graduate status, only those variables that were  
30 statistically significant ( $p \leq 0.05$ ) when associated with offer status. The specific factors were gender,  
31 ethnicity and socio-economic class (IMD and NS-SEC). We also tested for interaction of these factors  
32 which enabled us to ask whether graduates from different socio-economic backgrounds were more  
33 or less likely to receive offers. The overall model performance, using *Nagelkerke's R<sup>2</sup>* ranged from  
34 0.20 to 0.23 across the models developed. Results of the two-way interaction terms (Table 3)  
35 showed that after adjusting for other factors, the additional effect of socio-economic disadvantage  
36 for graduates (compared to non-graduates) was small and did not reach statistical significance  
37 ( $p = 0.69$  for the interaction of graduate status and IMD;  $p = 0.22$  for the interaction of graduate status  
38 and parental occupation (NS-SEC)). The result suggests that the association between socio-  
39 economic disadvantage and the likelihood of getting an offer for medical school affected graduates  
40 and non-graduates in a similar way.  
41  
42  
43  
44  
45  
46  
47  
48

49 ..... Table 3 about here.....  
50

51 ----insert figures 1,2,3 about here----  
52  
53

54 Figure 1 gives a graphical summary of the results from final model. In general, the odds of getting an  
55 offer to study medicine were lower if the applicant was male, graduate, from black and minority  
56  
57

1  
2  
3 ethnic (BME) background, and from lower socioeconomic groups (NS-SEC1, and IMD 'I' – least  
4 affluent neighbourhood). Figures 2 and 3 give a graphical summary of the odds ratio after separating  
5 graduates and non-graduates, to help further illustrate the difference between the two groups. For  
6 the non-graduates, the pattern is almost the same as the combined model in that the odds of getting  
7 an offer were higher if the applicant was female, from white ethnic background, and from high  
8 socioeconomic groups (NS-SEC1, and IMD I – most affluent neighbourhood). Some explanation for  
9 this pattern is because the non-graduates were in such a high proportion of the whole group. In  
10 comparison, for graduates, the predictor values that stand out are gender and ethnicity. However,  
11 notably, nearly a quarter of graduate applicants had a missing combination of socio-economic profile  
12 data (NS-SEC and IMD) which may explain why SES measures were less important predictors for  
13 graduates.  
14  
15  
16  
17  
18  
19  
20  
21

## 22 DISCUSSION

23  
24  
25 In this analysis of a large, multi-cohort contemporary dataset, we examined differences between  
26 graduates and non-graduate applicants to UK medical schools. Unlike previous studies in this area,  
27 we compared a larger sample of graduate applicants with non-graduates, rather than comparing by  
28 course (traditional versus GEM). This allowed us to capture the characteristics of a broader group of  
29 graduate applicants compared to earlier studies. Our results show that graduate and non-graduate  
30 applicants to UK medical schools are very similar on a range of socio-demographic markers, including  
31 multiple markers of socio-economic status. This indicates that, even with time and much investment  
32 in GEM courses, the aim of diversifying the medical student population on socio-economic grounds  
33 by attracting graduates has not been successful.<sup>6</sup>  
34  
35  
36  
37  
38  
39

40 Interestingly, unlike previous studies<sup>29</sup>, we did not identify any differences across graduates and  
41 non-graduates in terms of ethnicity. This may represent a change in the medical student population  
42 overall or may be an artefact of study design given that we looked at graduates in all medical  
43 programmes, not just GEM programmes.  
44  
45  
46

47 We also looked at who received an offer. Put simple, non-graduates were twice as likely to receive  
48 an offer as graduates. The patterns across non-graduates and graduates were similar in terms of  
49 gender and ethnicity but, in non-graduates, offers to study medicine were higher if the applicant was  
50 from a higher socio-economic group. However, measures of socio-economic status are self-declared  
51 and there was a large proportion of missing socio-economic data for the graduate sub-group. This  
52 reflects patterns seen in other similar studies.<sup>32-36</sup> Given the high proportion of missing data it would  
53  
54  
55  
56  
57  
58  
59  
60

1  
2  
3 be misleading to conclude that IMD and NS-SEC are weaker predictors for assessing the likelihood of  
4 getting an offer among graduate applicants because many graduate applicants were excluded from  
5 the logistic regression analysis and the missing data could also have led to insufficient power to  
6 detect smaller effects. Moreover, allocating students to an occupational group that depends on their  
7 family circumstances (area, parental occupation) can be problematic, especially for mature  
8 students.<sup>37,38</sup> However, we had no other measures available to us: no matter how limited<sup>32,34</sup>, those  
9 used are the 'basic units' that indicate educational disadvantage in the UK. We urge organisations  
10 such as UCAS and UKCAT to explore ways of improving self-declared data reporting, and government  
11 bodies such as the UK's Office for National Statistics to explore more effective measures of socio-  
12 economic status.  
13  
14  
15  
16  
17  
18

19 Overall, we found that graduates were proportionally less likely to receive an offer than non-  
20 graduate applicants, and those graduates who were offered places had significantly higher UKCAT  
21 scores than their non-graduate equivalents. We know from earlier studies<sup>29</sup> and contemporary  
22 routine data that the average competition, or selection, ratios for GEM programmes are significantly  
23 higher than for traditional five-year programmes. Moreover, GEM selection processes also tend to  
24 place more weight on UKCAT performance than do traditional programmes typically (this is  
25 associated with school leaving examinations being potentially less discriminatory for graduates - who  
26 would have taken these exams in earlier years, when it was less common to achieve top grades<sup>39</sup>).  
27 These factors may explain this outcome. However, future research which compares selection ratios  
28 for non-graduates and graduates by programme would provide a more nuanced understanding of  
29 differences across groups. Additionally, future studies could also look more closely at graduate and  
30 non-graduate patterns of performance in the various stages of medical school selection for the high  
31 number of graduates applying to traditional programmes. For example, we do not know whether  
32 graduates and non-graduates with equivalent grades and UKCAT scores are invited to interview,  
33 then graduates "fall down" at that stage. These studies would address concerns in the wider  
34 education literature that graduates and non-graduates are judged differently.<sup>40</sup>  
35  
36  
37  
38  
39  
40  
41  
42  
43  
44

45 The present study has various limitations that must be taken into consideration when interpreting  
46 findings. It was not possible to compare prior attainment across graduate and non-graduate groups  
47 with any confidence in this study because of the different weightings given to school and degree  
48 qualifications. However, this is a tricky comparison at the best of times (see above - graduates by  
49 their very nature have taken the school leaving exams which are typically used in medical selection  
50 to indicate prior attainment some years previous to their non-graduate counterparts). The issue of  
51 comparing "apples and oranges" arises as over recent years the average A level score has  
52 progressively risen ("grade inflation").<sup>39,41,42</sup>  
53  
54  
55  
56  
57  
58  
59  
60

1  
2  
3 In conclusion, the aim of diversifying the medical student population on socio-economic grounds by  
4 attracting graduates has been only marginally successful, with very minor positive trends in all areas.  
5 It may be that to draw a more diverse group of graduates into medicine requires different selection  
6 criteria for this group, one that places appreciable weight on the degree qualification and other  
7 graduate attributes, such as experience and passion for medicine. However, to change the selection  
8 process of graduates or indeed any group requires a shift towards affirmative action and/or a  
9 commitment to increase diversity. There appears to be little appetite for the former in the UK even  
10 though there is some evidence from other contexts that students from minority populations enrich  
11 the teaching environment of a medical school and may be more likely to practice in underserved  
12 areas.<sup>43-45</sup>  
13  
14  
15  
16  
17  
18  
19  
20  
21  
22  
23  
24

### 25 **Contributions**

26 We thank UKCAT for releasing the data for this project via a competitive bid process. We are also  
27 grateful to Dr Sally Curtis (University of Southampton) for the general advice throughout the project.  
28  
29  
30

### 31 **COMPETING INTERESTS AND FUNDING**

32 This study is part of Ben Kumwenda's doctoral programme of research funded by the UKCAT  
33 Research Panel, of which JC is a member and RG the Administrator.  
34  
35  
36  
37  
38  
39  
40

### 41 **ETHICAL PERMISSION**

42 The Chair of the local ethics committee ruled that formal ethical approval was not required for this  
43 study given the fully anonymised data was held in safe haven and all students who sit UKCAT are  
44 informed that their data and results will be used in educational research.  
45  
46  
47  
48  
49  
50

### 51 **AUTHOR CONTRIBUTIONS**

52 RMck led the funding bid which was co-written by JC and GP, and reviewed by RG. RG advised on  
53 the nature of the data. BK managed the data, and planned and carried out the data analysis under  
54  
55  
56  
57

1  
2  
3 the supervision of GP. JC guided the first draft of the introduction and discussion sections of this  
4  
5 paper. BK and GP wrote the first drafts of the methods and results sections. JC edited the drafts. All  
6  
7 authors reviewed and agreed the final draft of the paper.  
8  
9

#### 10 11 **DATA SHARING** 12

13 No additional data is available as the datasets are held in safe haven.  
14  
15  
16  
17  
18  
19  
20  
21  
22  
23  
24  
25  
26  
27  
28  
29  
30  
31  
32  
33  
34  
35  
36  
37  
38  
39  
40  
41  
42  
43  
44  
45  
46  
47  
48  
49  
50  
51  
52  
53  
54  
55  
56  
57  
58  
59  
60

For peer review only

**REFERENCES**

1. Castillo-Page L. Diversity in Medical Education: Facts & Figures. Washington DC: Association of American Medical Colleges; 2012.
2. Milburn A. University Challenge: How Higher Education Can Advance Social Mobility. London: Cabinet Office; 2012.
3. Cleland J, Dowell J, McLachlan J, Nicholson S, Patterson F. Identifying best practice in the selection of medical students: A project commissioned by the General Medical Council; 2012.
4. Larkins S, Michielsen K, Iputo J, et al. Impact of selection strategies on representation of underserved populations and intention to practise: International findings. *Medical Education* 2015;49:60-72.
5. Behrendt. L, Larkin. S, Griew. R, Kelly. P. Review of Higher Education Access and Outcomes for Aboriginal and Torres Strait Islander People Final Report. Canberra, Australia: Australian Government Department of Education and Training; 2012.
6. Mathers J, Sitch A, Marsh JL, Parry J. Widening access to medical education for under-represented socioeconomic groups: population based cross sectional analysis of UK data, 2002-6. *British Medical Journal* 2011;342:7.
7. Griffin B, Hu W. The interaction of socio-economic status and gender in widening participation in medicine. *Medical education* 2015;49:103-13.
8. Steven K, Dowell J, Jackson C, Guthrie B. Fair access to medicine? Retrospective analysis of UK medical schools application data 2009-2012 using three measures of socioeconomic status. *Bmc Medical Education* 2016;16:10.
9. Nicholson S, Cleland JA. "It's making contacts": notions of social capital and implications for widening access to medical education. *Advances in Health Sciences Education* 2016:1-14.
10. Independent Reviewer on Social Mobility and Child Poverty. Fair Access to Professional Careers. London: Cabinet Office; 2012.
11. Medical Workforce Standing Advisory committee. Planning the Medical Workforce. Third Report. London: Department of Health; 1997.
12. Wilkinson TJ, Wells JE, Bushnell JA. Are differences between graduates and undergraduates in a medical course due to age or prior degree (vol 38, pg 1141, 2004). *Medical Education* 2005;39:1141-6.
13. Peile E, George C. Should all medical students be graduates first? *British Medical Journal* 2007;335:1072-3.
14. Carter YH, Peile E. Graduate entry medicine: high aspirations at birth. *Clinical Medicine* 2007;7:143-7.
15. British Medical Association. Equality and Diversification in UK Medical Schools. London: BMA; 2009.
16. Dowell J, Norbury M, Steven K, Guthrie B. Widening access to medicine may improve general practitioner recruitment in deprived and rural communities: survey of GP origins and current place of work. *BMC Medical Education* 2015;15:165.
17. Puddey IB, Playford DE, Mercer A. Impact of medical student origins on the likelihood of ultimately practicing in areas of low vs high socio-economic status. *Bmc Medical Education* 2017;17:13.
18. GP Taskforce. Securing the future of GP workforce. Delivering the Mandate on GP Expansion. GP taskforce final report; 2014.
19. Cleland J, Johnston PW, French FH, Needham G. Associations between medical school and career preferences in Year 1 medical students in Scotland. *Medical Education* 2012;46:473-84.
20. Niven V, Cabot LB, Gallagher JE. Widening participation - a comparison of the characteristics of successful UK applicants to the five-year and four-year dental programmes in 2007 and 2008. *British Dental Journal* 2013;214:117-22.
21. James D, Ferguson E, Powis D, et al. Graduate entry to medicine: widening psychological diversity. *Bmc Medical Education* 2009;9:8.



- 1  
2  
3 22. Elliott SL, Epstein J. Selecting the future doctors: the role of graduate medical programmes. *Internal Medicine Journal* 2005;35:174-7.
- 4  
5 23. Dodds AE, Reid KJ, Conn JJ, Elliott SL, McColl GJ. Comparing the academic performance of  
6 graduate- and undergraduate-entry medical students. *Medical Education* 2010;44:197-204.
- 7 24. Byrne AT, Arnett R, Farrell T, Sreenan S. Comparison of performance in a four year graduate  
8 entry medical programme and a traditional five/six year programme. *Bmc Medical Education*  
9 2014;14.
- 10 25. Casey D, Thomas S, Hocking DR, Kemp-Casey A. Graduate-entry medical students: older and  
11 wiser but not less distressed. *Australasian Psychiatry* 2016;24:88-92.
- 12 26. Calvert MJ, Ross NM, Freemantle N, Xu Y, Zvauya R, Parle JV. Examination performance of  
13 graduate entry medical students compared with mainstream students. *Journal of the Royal Society*  
14 *of Medicine* 2009;102:425-30.
- 15 27. Les B, Howard S. *Education Policy: Process, Themes and Impact*. New York: Routledge; 2006.
- 16 28. Rolfe IE, Ringland C, Pearson SA. Graduate entry to medical school? Testing some  
17 assumptions. *Medical Education* 2004;38:778-86.
- 18 29. Garrud P. Who applies and who gets admitted to UK graduate entry medicine? - an analysis  
19 of UK admission statistics. *Bmc Medical Education* 2011;11:4.
- 20 30. Medschoolsonline. at [http://www.medschoolsonline.co.uk/graduate-entry-](http://www.medschoolsonline.co.uk/graduate-entry-programme/)  
21 [programme/](http://www.medschoolsonline.co.uk/graduate-entry-programme/).(accessed May 2017)
- 22 31. HIC Safe Haven. Health Informatics Centre. 2016, at [http://medicine.dundee.ac.uk/hic-safe-](http://medicine.dundee.ac.uk/hic-safe-haven-0.)  
23 [haven-0.](http://medicine.dundee.ac.uk/hic-safe-haven-0.))
- 24 32. Do P, Parry J, Mathers J, Richardson M. Monitoring the widening participation initiative for  
25 access to medical school: are present measures sufficient? *Medical education* 2006;40:750-8.
- 26 33. Hoare A, Johnston R. Widening participation through admissions policy - a British case study  
27 of school and university performance. *Studies in Higher Education* 2011;36:21-41.
- 28 34. Boliver V, Gorard S, Siddiqui N. Will the Use of Contextual Indicators Make UK Higher  
29 Education Admissions Fairer? *Education Sciences* 2015;5:306.
- 30 35. MacKenzie RK, Dowell J, Ayansina D, Cleland JA. Do personality traits assessed on medical  
31 school admission predict exit performance? A UK-wide longitudinal cohort study. *Advances in Health*  
32 *Sciences Education* 2016:1-21.
- 33 36. James D, Ferguson E, Powis D, Symonds I, Yates J. Graduate entry to medicine: widening  
34 academic and socio-demographic access. *Medical Education* 2008;42:294-300.
- 35 37. Gorard S, Adnett N, May H, Slack K, Smith E, Thomas L. *Overcoming the barriers to higher*  
36 *education*. Stoke-on-Trent: Trentham Books; 2007.
- 37 38. Harrison N, Hatt S. Knowing the 'unknowns': investigating the students whose social class is  
38 not known at entry to higher education. *Journal of Further and Higher Education* 2009;33:347-57.
- 39 39. McManus IC, Powis DA, Wakeford R, Ferguson E, James D, Richards P. Intellectual aptitude  
40 tests and A levels for selecting UK school leaver entrants for medical school. *British Medical Journal*  
41 2005;331:555-9.
- 42 40. Blackstone T. Does Maturity Make a Difference? RESEARCH REPORT-POLICY STUDIES  
43 INSTITUTE 1997:38-45.
- 44 41. James D, Yates J, Nicholson S. Comparison of A level and UKCAT performance in students  
45 applying to UK medical and dental schools in 2006: cohort study. *British Medical Journal* 2010;340:7.
- 46 42. Johnes. G. Standards and grade inflation. In: Johnes. G, Johnes. J, eds. *International*  
47 *Handbook on the Economics of Education*. Cheltenham: Edward Elgar Publishing Ltd; 2004.
- 48 43. Xu G, Fields SK, Laine C, Veloski JJ, Barzansky B, Martini CJ. The relationship between the  
49 race/ethnicity of generalist physicians and their care for underserved populations. *American Journal*  
50 *of Public Health* 1997;87:817-22.
- 51 44. Whitla DK, Orfield G, Silen W, Teperow C, Howard C, Reede J. Educational benefits of  
52 diversity in medical school: A survey of students. *Academic Medicine* 2003;78:460-6.
- 53  
54  
55  
56  
57  
58  
59  
60



1  
2  
3  
4  
5  
6  
7  
8  
9  
10  
11  
12  
13  
14  
15  
16  
17  
18  
19  
20  
21  
22  
23  
24  
25  
26  
27  
28  
29  
30  
31  
32  
33  
34  
35  
36  
37  
38  
39  
40  
41  
42  
43  
44  
45  
46  
47  
48  
49  
50  
51  
52  
53  
54  
55  
56  
57  
58  
59  
60

45. Saha S, Guiton G, Wimmers PF, Wilkerson L. Student body racial and ethnic composition and diversity-related outcomes in US medical schools. *Jama-Journal of the American Medical Association* 2008;300:1135-45.

For peer review only

|                                    |                                             | BMJ Open     |        |             |       | Graduate    |        |             |       |
|------------------------------------|---------------------------------------------|--------------|--------|-------------|-------|-------------|--------|-------------|-------|
|                                    |                                             | Non-graduate |        | Graduate    |       | Application |        | Offer       |       |
|                                    |                                             | Application  | Offer  | Application | Offer | Application | Offer  | Application | Offer |
|                                    |                                             | n            | %      | n           | %     | n           | %      | n           | %     |
| <b>Gender</b>                      |                                             |              |        |             |       |             |        |             |       |
|                                    | Female                                      | 49082        | 55.9   | 22716       | 56.2  | 13999       | 57.7   | 3812        | 56.7  |
|                                    | Male                                        | 38656        | 44.1   | 17702       | 43.8  | 10256       | 42.3   | 2910        | 43.3  |
|                                    | Total                                       | 87738        |        | 40418       |       | 24255       |        | 6722        |       |
| <b>Ethnicity II</b>                |                                             |              |        |             |       |             |        |             |       |
|                                    | Caucasian                                   | 47103        | 61.9   | 25421       | 69.8  | 14014       | 64.3   | 4831        | 78.3  |
|                                    | Non-Caucasian                               | 28941        | 38.1   | 10995       | 30.2  | 7765        | 35.6   | 1335        | 21.7  |
|                                    | Total                                       | 76044        |        | 36416       |       | 21779       |        | 6166        |       |
|                                    | Missing                                     | (11694)      | (13.3) |             |       | (2476)      | (10.2) |             |       |
| <b>School Attended<sup>‡</sup></b> |                                             |              |        |             |       |             |        |             |       |
|                                    | Fee Paying                                  | 17388        | 25.5   | 10184       | 29.2  | 1672        | 21.1   | 664         | 24.5  |
|                                    | Non-Fee Paying                              | 50796        | 74.5   | 24705       | 70.8  | 6249        | 78.9   | 2043        | 75.5  |
|                                    | Total                                       | 68184        |        | 34889       |       | 7921        |        | 2707        |       |
|                                    | Missing                                     | (2263)       | (3.2)  |             |       | (12988)     | (62.1) |             |       |
| <b>IMD Quintile<sup>‡</sup></b>    |                                             |              |        |             |       |             |        |             |       |
|                                    | 1                                           | 28518        | 34.6   | 14043       | 40    | 5972        | 26.2   | 1894        | 32    |
|                                    | 2                                           | 19202        | 23.3   | 8767        | 25    | 4693        | 20.6   | 1375        | 23.2  |
|                                    | 3                                           | 14986        | 18.2   | 6196        | 17.6  | 4450        | 19.6   | 1134        | 19.2  |
|                                    | 4                                           | 10883        | 13.2   | 3734        | 10.6  | 4261        | 18.7   | 959         | 16.2  |
|                                    | 5                                           | 8815         | 10.7   | 2394        | 6.8   | 3378        | 14.8   | 552         | 9.3   |
|                                    | Total                                       | 82404        |        | 35134       |       | 22754       |        | 5914        |       |
|                                    | Missing                                     | (1260)       | (1.5)  |             |       | (592)       | (2.5)  |             |       |
| <b>NS_SEC<sup>‡</sup></b>          |                                             |              |        |             |       |             |        |             |       |
|                                    | Managerial and Professional Occupations     | 61624        | 84.1   | 28025       | 87.9  | 15622       | 78.7   | 4406        | 83.3  |
|                                    | Intermediate Occupations                    | 3399         | 4.6    | 1337        | 4.2   | 1167        | 5.9    | 295         | 5.6   |
|                                    | Small Employers and Own Account Occupations | 4676         | 6.4    | 1501        | 4.7   | 1572        | 7.9    | 313         | 5.9   |
|                                    | Lower Supervisory and Technical Occupations | 1410         | 1.9    | 423         | 1.3   | 639         | 3.2    | 129         | 2.4   |
|                                    | Routine and Semi-Routine Occupations        | 2198         | 3      | 580         | 1.8   | 848         | 4.3    | 149         | 2.8   |
|                                    | Total                                       | 73307        |        | 31866       |       | 19848       |        | 5292        |       |
|                                    | Missing                                     | (10357)      | (12.4) |             |       | (3498)      | (15)   |             |       |
| <b>Domicile</b>                    |                                             |              |        |             |       |             |        |             |       |
|                                    | UK                                          | 70447        | 80.3   | 35333       | 88    | 20909       | 86.2   | 6051        | 90    |
|                                    | EU                                          | 6694         | 7.6    | 1078        | 2.7   | 1467        | 6      | 280         | 4.2   |
|                                    | International                               | 10597        | 12.1   | 3785        | 9.4   | 1879        | 7.7    | 391         | 5.8   |
|                                    | Total                                       | 87738        |        | 40418       |       | 24255       |        | 6722        |       |
| <b>UKCAT Attempt Number</b>        |                                             |              |        |             |       |             |        |             |       |
|                                    | 1                                           | 75049        | 85.5   | 34770       | 86    | 15562       | 64.2   | 4718        | 70.2  |
|                                    | 2                                           | 11803        | 13.5   | 5390        | 13.3  | 5722        | 23.6   | 1425        | 21.2  |
|                                    | 3+                                          | 886          | 1      | 258         | 0.6   | 2971        | 12.2   | 579         | 8.6   |
|                                    | Total                                       | 87738        |        | 40418       |       | 24255       |        | 6722        |       |
| <b>Final Outcome</b>               |                                             |              |        |             |       |             |        |             |       |
|                                    | No Offer                                    | 43964        | 52.1   |             |       | 14736       | 68.7   |             |       |
|                                    | Offer                                       | 40418        | 47.9   | 40418       |       | 6722        | 27.7   | 6722        |       |
|                                    | Total                                       | 84382        |        |             |       | 21458       |        |             |       |
|                                    | Missing                                     | (3356)       | (3.8)  |             |       | (2797)      | (11.5) |             |       |

<sup>‡</sup> Sample drawn from UK domiciled applicants only

| Table 2                                                                                                                                                                                                                                                                                   |                                             | Mean UKCAT Scores <sup>†</sup> |        |       |         |          |        |        |         |
|-------------------------------------------------------------------------------------------------------------------------------------------------------------------------------------------------------------------------------------------------------------------------------------------|---------------------------------------------|--------------------------------|--------|-------|---------|----------|--------|--------|---------|
|                                                                                                                                                                                                                                                                                           |                                             | Non-graduate                   |        |       |         | Graduate |        |        |         |
|                                                                                                                                                                                                                                                                                           |                                             | N                              | Mean   | SD    | P value | N        | Mean   | SD     | P value |
| <b>Gender</b>                                                                                                                                                                                                                                                                             |                                             |                                |        |       |         |          |        |        |         |
|                                                                                                                                                                                                                                                                                           | Female                                      | 49047                          | 2532.2 | 269.8 | <0.001  | 13974    | 2501.7 | 285.71 | <0.001  |
|                                                                                                                                                                                                                                                                                           | Male                                        | 38633                          | 2581.8 | 267.7 |         | 10241    | 2550.9 | 291.22 |         |
| <b>Ethnicity</b>                                                                                                                                                                                                                                                                          |                                             |                                |        |       |         |          |        |        |         |
|                                                                                                                                                                                                                                                                                           | Caucasian                                   | 47102                          | 2597.9 | 243.6 | <0.001  | 14000    | 2591.2 | 261.15 |         |
|                                                                                                                                                                                                                                                                                           | Non-Caucasian                               | 26298                          | 2512.1 | 282.0 |         | 7128     | 2402.3 | 294.32 |         |
| <b>School Attended<sup>‡</sup></b>                                                                                                                                                                                                                                                        |                                             |                                |        |       |         |          |        |        |         |
|                                                                                                                                                                                                                                                                                           | Fee Paying                                  | 17388                          | 2632.5 | 239.2 | <0.001  | 1670     | 2611.6 | 233.21 | <0.001  |
|                                                                                                                                                                                                                                                                                           | Non-Fee Paying                              | 50787                          | 2562.8 | 260.0 |         | 6233     | 2527.2 | 265.93 |         |
| <b>IMD Quintile<sup>‡</sup></b>                                                                                                                                                                                                                                                           |                                             |                                |        |       |         |          |        |        |         |
|                                                                                                                                                                                                                                                                                           | I                                           | 24427                          | 2627.9 | 237.8 | <0.001  | 5395     | 2600.4 | 263.94 | <0.001  |
|                                                                                                                                                                                                                                                                                           | II                                          | 16291                          | 2604.6 | 244.6 |         | 4206     | 2578.1 | 269.33 |         |
|                                                                                                                                                                                                                                                                                           | III                                         | 12505                          | 2576.7 | 253.6 |         | 3937     | 2531.5 | 273.30 |         |
|                                                                                                                                                                                                                                                                                           | IV                                          | 8936                           | 2516.6 | 269.3 |         | 3801     | 2479.3 | 298.79 |         |
|                                                                                                                                                                                                                                                                                           | V                                           | 7194                           | 2425.9 | 282.8 |         | 2990     | 2397.5 | 312.92 |         |
| <b>NSSEC<sup>‡</sup></b>                                                                                                                                                                                                                                                                  |                                             |                                |        |       |         |          |        |        |         |
|                                                                                                                                                                                                                                                                                           | Managerial and Professional Occupations     | 52555                          | 2604.1 | 249.0 | <0.001  | 14084    | 2560.6 | 281.44 | <0.001  |
|                                                                                                                                                                                                                                                                                           | Intermediate Occupations                    | 2784                           | 2568.7 | 246.3 |         | 1059     | 2541.3 | 272.21 |         |
|                                                                                                                                                                                                                                                                                           | Small Employers and Own Account Occupations | 3635                           | 2518.8 | 256.5 |         | 1367     | 2466.0 | 279.27 |         |
|                                                                                                                                                                                                                                                                                           | Lower Supervisory and Technical Occupations | 1181                           | 2486.6 | 259.5 |         | 551      | 2448.9 | 296.20 |         |
|                                                                                                                                                                                                                                                                                           | Routine and Semi-Routine Occupations        | 1775                           | 2465.0 | 270.2 |         | 740      | 2441.2 | 276.38 |         |
| <b>Number of attempts</b>                                                                                                                                                                                                                                                                 |                                             |                                |        |       |         |          |        |        |         |
|                                                                                                                                                                                                                                                                                           | 1                                           | 75000                          | 2541.7 | 272.9 | <0.001  | 15554    | 2507.5 | 299.42 | <0.001  |
|                                                                                                                                                                                                                                                                                           | 2                                           | 11798                          | 2628.4 | 237.9 |         | 5711     | 2552.7 | 273.84 |         |
|                                                                                                                                                                                                                                                                                           | 3 or more                                   | 882                            | 2604.4 | 256.0 |         | 2950     | 2543.5 | 254.43 |         |
| <b>Final Outcome</b>                                                                                                                                                                                                                                                                      |                                             |                                |        |       |         |          |        |        |         |
|                                                                                                                                                                                                                                                                                           | No offer                                    | 43925                          | 2455.6 | 265.2 | <0.001  | 14713    | 2443.9 | 278.01 | <0.001  |
|                                                                                                                                                                                                                                                                                           | Offer                                       | 40405                          | 2657.7 | 235.3 |         | 6711     | 2697.7 | 244.39 |         |
| <sup>†</sup> The numbers presented here are the mean scores based on the applicants' last UKCAT sitting. However, the counts of applicants are not the same as in table 1 because some applicants had missing UKCAT scores<br><sup>‡</sup> Sample drawn from UK domiciled applicants only |                                             |                                |        |       |         |          |        |        |         |

**Table 3: Multiple logistic regression for offers to medical school 2007 - 2014**

|                                                               |                                                           | Model 1, $R^2 = .22$ , |       |       | Model 2, $R^2 = .21$ |       |       | Model 3, $R^2 = .22$ |       |       | Model 4 $R^2 = .22$ |       |       |
|---------------------------------------------------------------|-----------------------------------------------------------|------------------------|-------|-------|----------------------|-------|-------|----------------------|-------|-------|---------------------|-------|-------|
|                                                               |                                                           | OR                     | Lower | Upper | OR                   | Lower | Upper | OR                   | Lower | Upper | OR                  | Lower | Upper |
| <b>UKCAT</b>                                                  |                                                           | 1.032                  | 1.032 | 1.033 | 1.032                | 1.032 | 1.033 | 1.032                | 1.032 | 1.033 | 1.032               | 1.032 | 1.033 |
| <b>Graduate Status</b>                                        | Non-graduate (default)                                    | 1                      |       |       | 1                    |       |       | 1                    |       |       | 1                   |       |       |
|                                                               | Graduate                                                  | 0.429                  | 0.399 | 0.461 | 0.438                | 0.419 | 0.458 | 0.441                | 0.421 | 0.463 | 0.450               | 0.432 | 0.468 |
| <b>Gender</b>                                                 | Female (default)                                          | 1                      |       |       | 1                    |       |       | 1                    |       |       |                     |       |       |
|                                                               | Male                                                      | 0.830                  | 0.803 | 0.857 | 0.830                | 0.803 | 0.857 | 0.830                | 0.804 | 0.857 | 0.830               | 0.804 | 0.857 |
| <b>Ethnicity</b>                                              | White (default)                                           | 1                      |       |       | 1                    |       |       | 1                    |       |       | 1                   |       |       |
|                                                               | Asian                                                     | 0.781                  | 0.750 | 0.813 | 0.780                | 0.748 | 0.812 | 0.774                | 0.741 | 0.809 | 0.780               | 0.748 | 0.812 |
|                                                               | Black                                                     | 0.574                  | 0.527 | 0.625 | 0.572                | 0.525 | 0.623 | 0.544                | 0.495 | 0.598 | 0.572               | 0.525 | 0.623 |
|                                                               | Mixed                                                     | 0.823                  | 0.756 | 0.896 | 0.823                | 0.756 | 0.896 | 0.808                | 0.736 | 0.888 | 0.823               | 0.756 | 0.896 |
|                                                               | Other                                                     | 0.804                  | 0.718 | 0.900 | 0.803                | 0.717 | 0.899 | 0.818                | 0.722 | 0.927 | 0.803               | 0.717 | 0.900 |
| <b>Index of Multiple Deprivation (IMD)</b>                    | I = Most affluent (default)                               | 1                      |       |       | 1                    |       |       | 1                    |       |       | 1                   |       |       |
|                                                               | II                                                        | 0.917                  | 0.876 | 0.960 | 0.921                | 0.884 | 0.960 | 0.921                | 0.884 | 0.960 | 0.921               | 0.884 | 0.960 |
|                                                               | III                                                       | 0.866                  | 0.823 | 0.911 | 0.869                | 0.830 | 0.909 | 0.869                | 0.830 | 0.909 | 0.868               | 0.830 | 0.909 |
|                                                               | IV                                                        | 0.775                  | 0.731 | 0.823 | 0.808                | 0.766 | 0.852 | 0.806                | 0.765 | 0.850 | 0.806               | 0.764 | 0.850 |
|                                                               | V - Least affluent                                        | 0.707                  | 0.657 | 0.760 | 0.724                | 0.679 | 0.773 | 0.723                | 0.678 | 0.771 | 0.723               | 0.677 | 0.771 |
| <b>Parental Occupation NS-SEC</b>                             | 1 - Managerial and Professional Occupations (default)     | 1                      |       |       | 1                    |       |       | 1                    |       |       |                     |       |       |
|                                                               | II - Intermediate Occupations                             | 0.891                  | 0.828 | 0.960 | 0.879                | 0.808 | 0.956 | 0.891                | 0.828 | 0.960 | 0.891               | 0.827 | 0.960 |
|                                                               | III - Small Employers and Own Account Occupations         | 0.854                  | 0.797 | 0.914 | 0.829                | 0.768 | 0.894 | 0.852                | 0.796 | 0.912 | 0.853               | 0.796 | 0.913 |
|                                                               | IV - Lower Supervisory and Technical Occupations          | 0.768                  | 0.684 | 0.862 | 0.709                | 0.621 | 0.809 | 0.766                | 0.683 | 0.860 | 0.767               | 0.683 | 0.860 |
|                                                               | V - Routine and Semi-Routine Occupations                  | 0.766                  | 0.693 | 0.847 | 0.732                | 0.654 | 0.820 | 0.765                | 0.692 | 0.845 | 0.764               | 0.691 | 0.844 |
| <b>Graduate status by Index of multiple deprivation (IMD)</b> | Graduate-by-IMD I - Most affluent neighbourhood (default) | 1                      |       |       |                      |       |       |                      |       |       |                     |       |       |
|                                                               | Graduate vs IMD_II                                        | 1.030                  | 0.922 | 1.150 |                      |       |       |                      |       |       |                     |       |       |
|                                                               | Graduate vs IMD_III                                       | 1.021                  | 0.909 | 1.147 |                      |       |       |                      |       |       |                     |       |       |
|                                                               | Graduate vs IMD_IV                                        | 1.189                  | 1.049 | 1.348 |                      |       |       |                      |       |       |                     |       |       |
| <b>p=0.69</b>                                                 | Graduate vs IMD_V - Least affluent neighbourhood          | 1.112                  | .957  | 1.293 |                      |       |       |                      |       |       |                     |       |       |
| <b>Graduate status by parental occupation (NS-SEC)</b>        | Graduate-by-NS-SEC - I (default)                          |                        |       |       | 1                    |       |       |                      |       |       |                     |       |       |
|                                                               | Graduate by NS-SEC - II                                   |                        |       |       | 1.068                | 0.893 | 1.276 |                      |       |       |                     |       |       |

1  
2  
3  
4  
5  
6  
7  
8  
9  
10  
11  
12  
13  
14  
15  
16  
17  
18  
19  
20  
21  
22  
23  
24  
25  
26  
27  
28  
29  
30  
31  
32  
33  
34  
35  
36  
37  
38  
39  
40  
41  
42  
43  
44  
45  
46  
47

|                                     |                                |  |  |  |       |       |       |       |       |       |  |  |  |
|-------------------------------------|--------------------------------|--|--|--|-------|-------|-------|-------|-------|-------|--|--|--|
| <b>p=0.22</b>                       | Graduate by NS-SEC - III       |  |  |  | 1.149 | 0.974 | 1.355 |       |       |       |  |  |  |
|                                     | Graduate by NS-SEC - IV        |  |  |  | 1.383 | 1.064 | 1.797 |       |       |       |  |  |  |
|                                     | Graduate by NS-SEC - V         |  |  |  | 1.211 | 0.959 | 1.530 |       |       |       |  |  |  |
| <b>Graduate status by Ethnicity</b> | Graduate-by-White (default)    |  |  |  |       |       |       | 1     |       |       |  |  |  |
|                                     | Graduate by Asian              |  |  |  |       |       |       | 1.039 | 0.931 | 1.160 |  |  |  |
|                                     | Graduate by Black              |  |  |  |       |       |       | 1.300 | 1.060 | 1.593 |  |  |  |
|                                     | Graduate by Mixed              |  |  |  |       |       |       | 1.101 | 0.885 | 1.371 |  |  |  |
| <b>p=0.10</b>                       | Graduate by Other ethnic group |  |  |  |       |       |       | 0.900 | 0.668 | 1.211 |  |  |  |

Model 1: Shows the interaction of graduate status by area deprivation (IMD), note non-significant value of p=0.69  
 Model 2: Shows the interaction of graduate status by parental occupation (NS-SEC), note non-significant value of p=0.22  
 Model 3: Shows the interaction of graduate status by ethnicity, note the non-significant value p=0.10  
 Model 4: Is the final model of all covariates, note all values are statistically significant, p<0.001

Figure Legends:

Title: Odds of an application resulting in offer of a place according to selected sociodemographic characteristics,

Figure 1: Odds Ratio, Final Model (all applicants)

Figure 2: Odds Ratio, Non-graduate Applicants

Figure 3: Odd Ratio, Graduate Applicants

1  
2  
3  
4  
5  
6  
7  
8  
9  
10  
11  
12  
13  
14  
15  
16  
17  
18  
19  
20  
21  
22  
23  
24  
25  
26  
27  
28  
29  
30  
31  
32  
33  
34  
35  
36  
37  
38  
39  
40  
41  
42  
43  
44  
45  
46  
47  
48  
49  
50  
51  
52  
53  
54  
55  
56  
57  
58  
59  
60

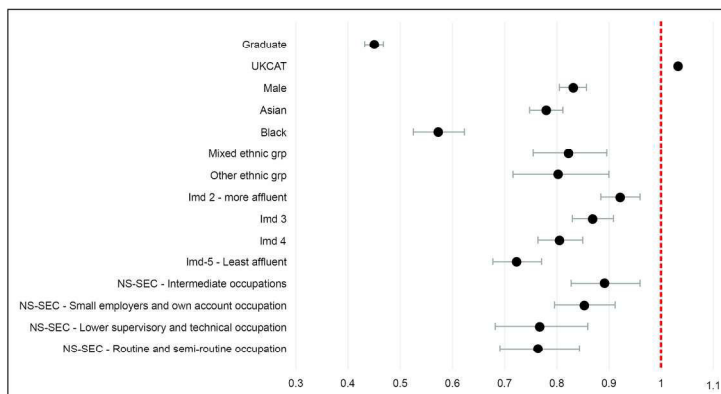

Figure 1

209x148mm (300 x 300 DPI)

Review only

1  
2  
3  
4  
5  
6  
7  
8  
9  
10  
11  
12  
13  
14  
15  
16  
17  
18  
19  
20  
21  
22  
23  
24  
25  
26  
27  
28  
29  
30  
31  
32  
33  
34  
35  
36  
37  
38  
39  
40  
41  
42  
43  
44  
45  
46  
47  
48  
49  
50  
51  
52  
53  
54  
55  
56  
57  
58  
59  
60

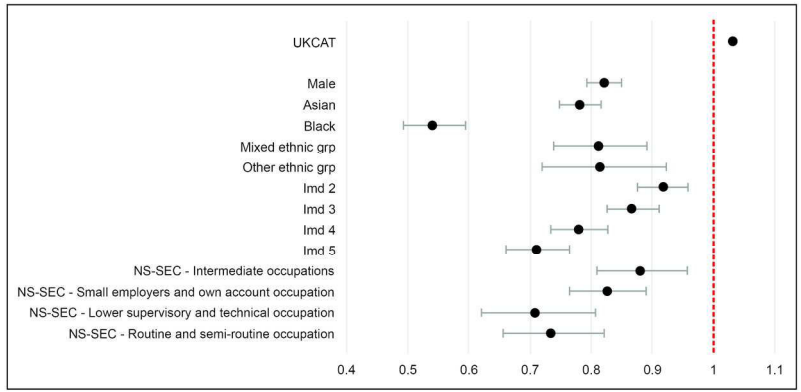

Figure 2

209x148mm (300 x 300 DPI)

1  
2  
3  
4  
5  
6  
7  
8  
9  
10  
11  
12  
13  
14  
15  
16  
17  
18  
19  
20  
21  
22  
23  
24  
25  
26  
27  
28  
29  
30  
31  
32  
33  
34  
35  
36  
37  
38  
39  
40  
41  
42  
43  
44  
45  
46  
47  
48  
49  
50  
51  
52  
53  
54  
55  
56  
57  
58  
59  
60

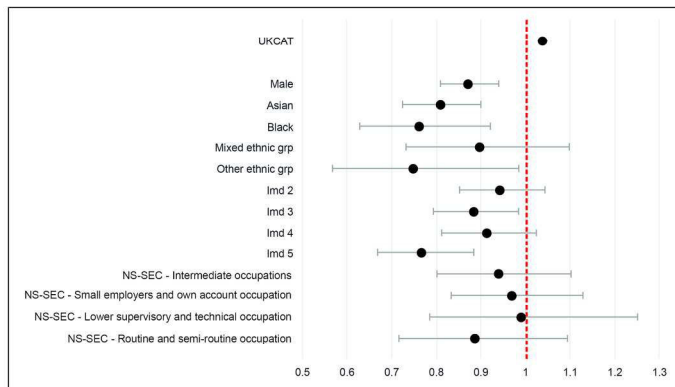

Figure 3

209x148mm (300 x 300 DPI)



Flow diagram showing data linkage for applicants to UKCAT consortium universities between 2006 - 2014

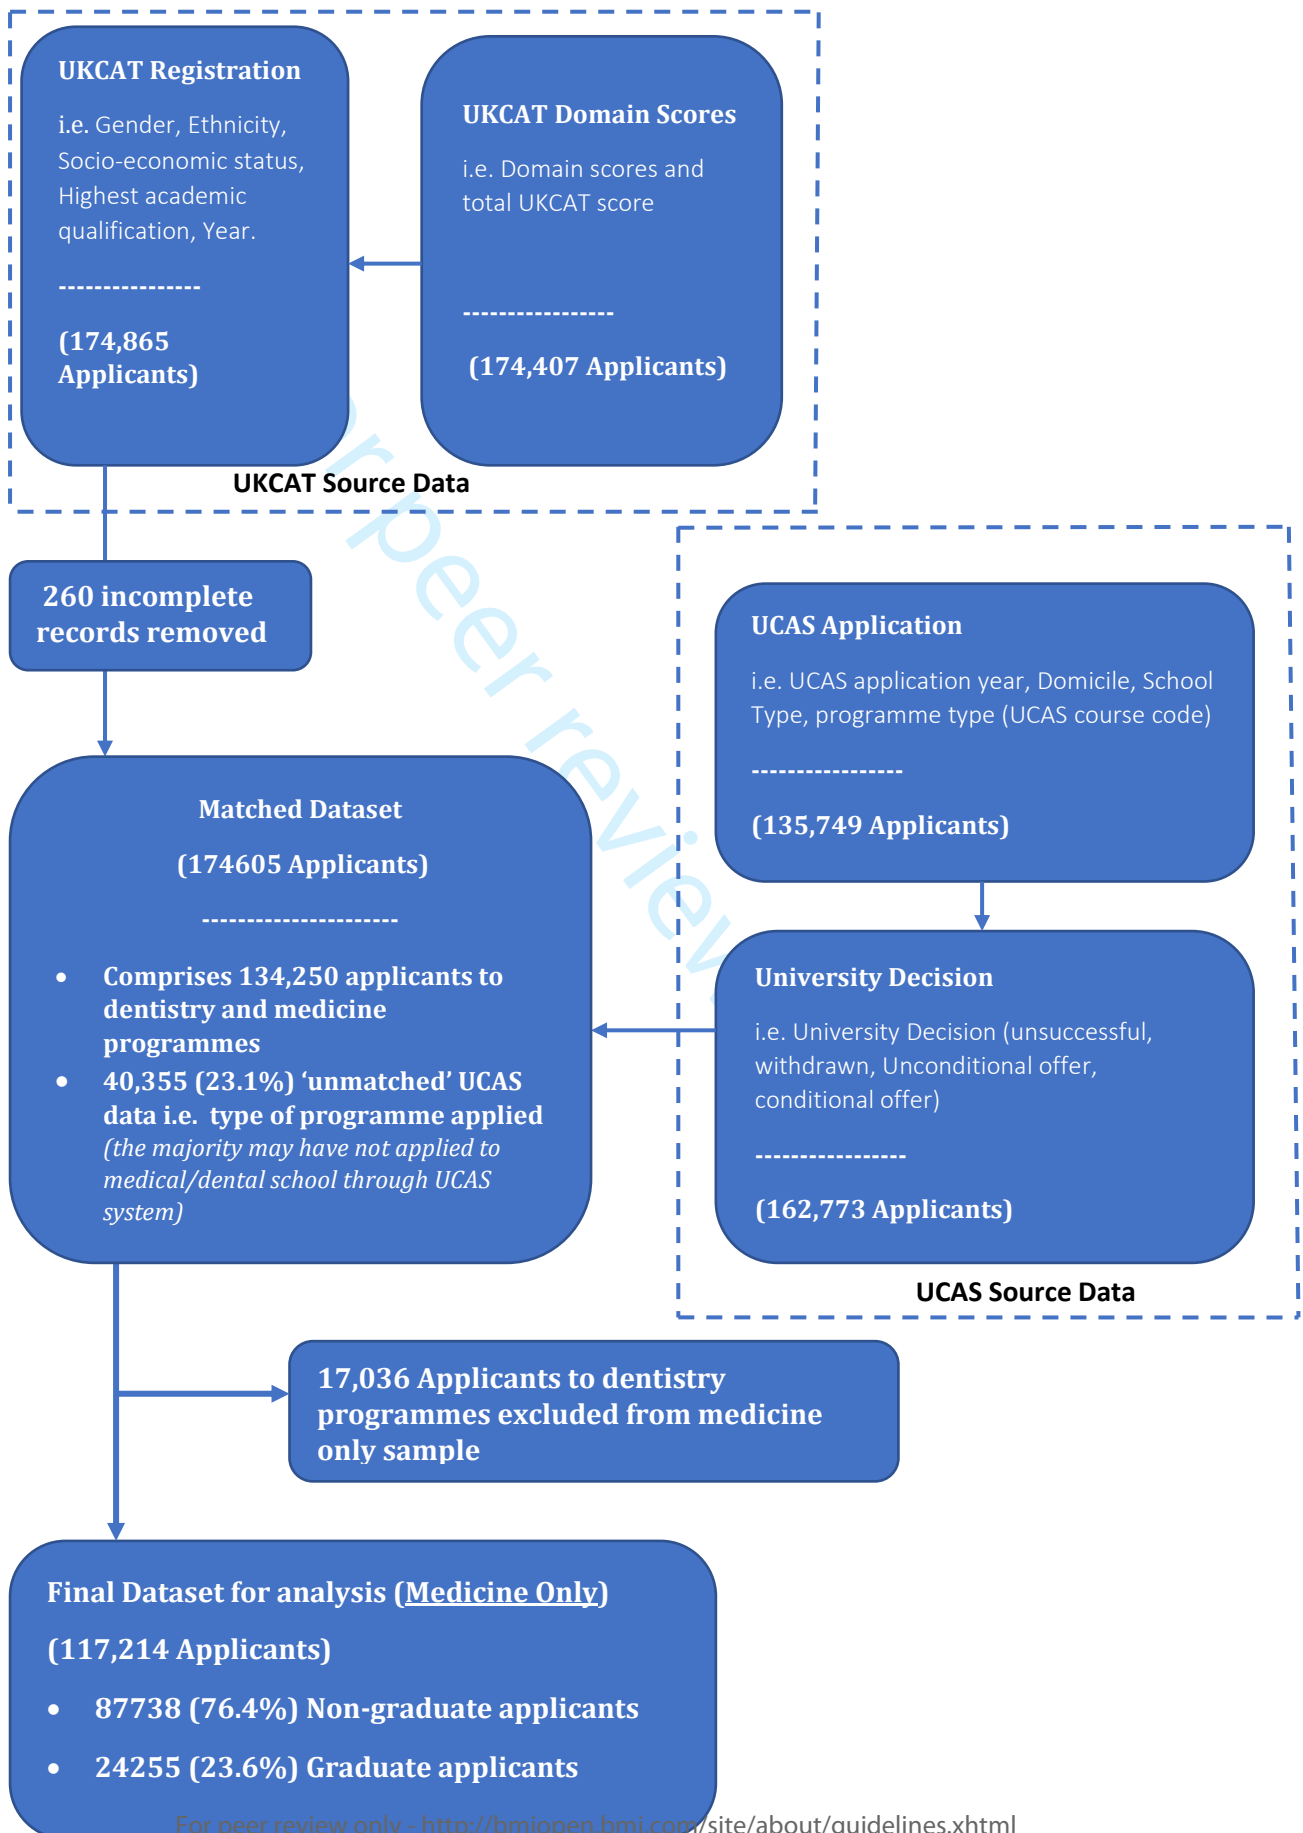

Chart 1 (group percentages)

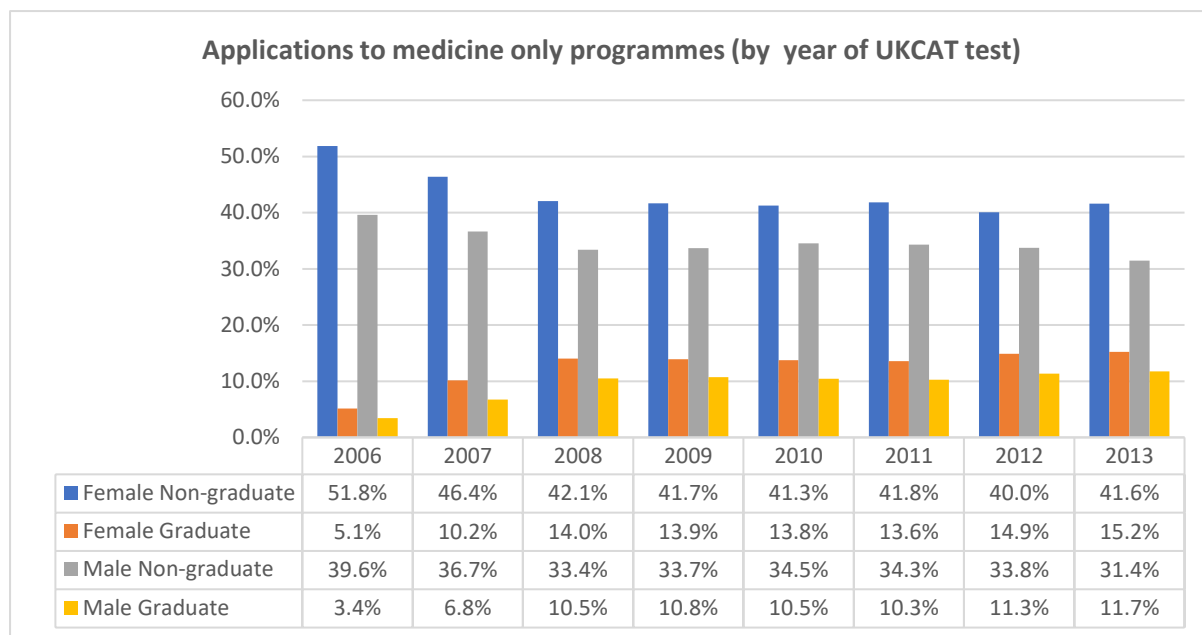

Chart 2 (raw figures)

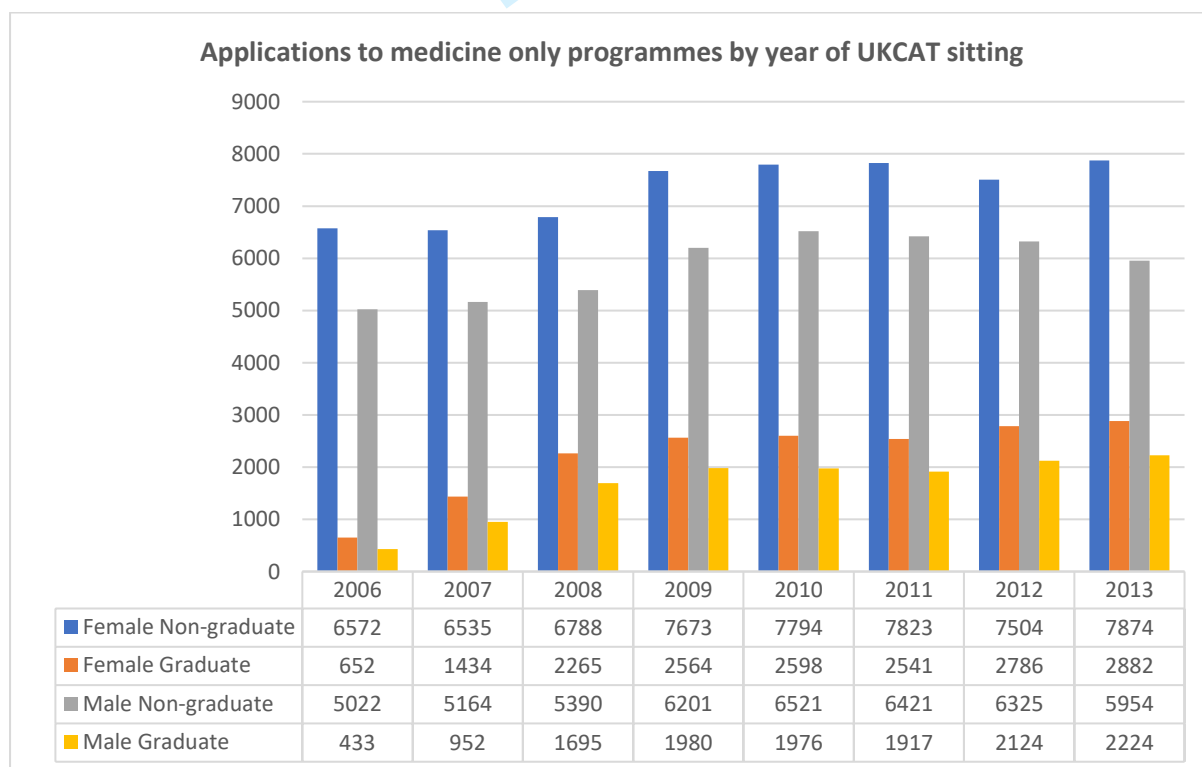

**STROBE 2007 (v4) Statement—Checklist of items that should be included in reports of cohort studies**

| Section/Topic             | Item # | Recommendation                                                                                                                                                                       | Reported on page # |
|---------------------------|--------|--------------------------------------------------------------------------------------------------------------------------------------------------------------------------------------|--------------------|
| Title and abstract        | 1      | (a) Indicate the study’s design with a commonly used term in the title or the abstract                                                                                               | 1                  |
|                           |        | (b) Provide in the abstract an informative and balanced summary of what was done and what was found                                                                                  | 2                  |
| <b>Introduction</b>       |        |                                                                                                                                                                                      |                    |
| Background/rationale      | 2      | Explain the scientific background and rationale for the investigation being reported                                                                                                 | 3 - 4              |
| Objectives                | 3      | State specific objectives, including any prespecified hypotheses                                                                                                                     | 3 - 4              |
| <b>Methods</b>            |        |                                                                                                                                                                                      |                    |
| Study design              | 4      | Present key elements of study design early in the paper                                                                                                                              | 5                  |
| Setting                   | 5      | Describe the setting, locations, and relevant dates, including periods of recruitment, exposure, follow-up, and data collection                                                      | 5 - 6              |
| Participants              | 6      | (a) Give the eligibility criteria, and the sources and methods of selection of participants. Describe methods of follow-up                                                           | 5                  |
|                           |        | (b) For matched studies, give matching criteria and number of exposed and unexposed                                                                                                  | n/a                |
| Variables                 | 7      | Clearly define all outcomes, exposures, predictors, potential confounders, and effect modifiers. Give diagnostic criteria, if applicable                                             | 6                  |
| Data sources/ measurement | 8*     | For each variable of interest, give sources of data and details of methods of assessment (measurement). Describe comparability of assessment methods if there is more than one group | n/a                |
| Bias                      | 9      | Describe any efforts to address potential sources of bias                                                                                                                            | 6                  |
| Study size                | 10     | Explain how the study size was arrived at                                                                                                                                            | 5                  |
| Quantitative variables    | 11     | Explain how quantitative variables were handled in the analyses. If applicable, describe which groupings were chosen and why                                                         | 6                  |
| Statistical methods       | 12     | (a) Describe all statistical methods, including those used to control for confounding                                                                                                | 6 - 7              |
|                           |        | (b) Describe any methods used to examine subgroups and interactions                                                                                                                  | 8                  |
|                           |        | (c) Explain how missing data were addressed                                                                                                                                          | 6                  |
|                           |        | (d) If applicable, explain how loss to follow-up was addressed                                                                                                                       | n/a                |
|                           |        | (e) Describe any sensitivity analyses                                                                                                                                                | n/a                |
| <b>Results</b>            |        |                                                                                                                                                                                      |                    |

|                          |     |                                                                                                                                                                                                              |        |
|--------------------------|-----|--------------------------------------------------------------------------------------------------------------------------------------------------------------------------------------------------------------|--------|
| Participants             | 13* | (a) Report numbers of individuals at each stage of study—eg numbers potentially eligible, examined for eligibility, confirmed eligible, included in the study, completing follow-up, and analysed            | n/a    |
|                          |     | (b) Give reasons for non-participation at each stage                                                                                                                                                         | n/a    |
|                          |     | (c) Consider use of a flow diagram                                                                                                                                                                           | n/a    |
| Descriptive data         | 14* | (a) Give characteristics of study participants (eg demographic, clinical, social) and information on exposures and potential confounders                                                                     | 8 - 9  |
|                          |     | (b) Indicate number of participants with missing data for each variable of interest                                                                                                                          | 15     |
|                          |     | (c) Summarise follow-up time (eg, average and total amount)                                                                                                                                                  | n/a    |
| Outcome data             | 15* | Report numbers of outcome events or summary measures over time                                                                                                                                               | n/a    |
| Main results             | 16  | (a) Give unadjusted estimates and, if applicable, confounder-adjusted estimates and their precision (eg, 95% confidence interval). Make clear which confounders were adjusted for and why they were included | 17     |
|                          |     | (b) Report category boundaries when continuous variables were categorized                                                                                                                                    | n/a    |
|                          |     | (c) If relevant, consider translating estimates of relative risk into absolute risk for a meaningful time period                                                                                             | n/a    |
| Other analyses           | 17  | Report other analyses done—eg analyses of subgroups and interactions, and sensitivity analyses                                                                                                               | 8      |
| <b>Discussion</b>        |     |                                                                                                                                                                                                              |        |
| Key results              | 18  | Summarise key results with reference to study objectives                                                                                                                                                     | 9 - 10 |
| <b>Limitations</b>       |     |                                                                                                                                                                                                              |        |
| Interpretation           | 20  | Give a cautious overall interpretation of results considering objectives, limitations, multiplicity of analyses, results from similar studies, and other relevant evidence                                   | 10     |
| Generalisability         | 21  | Discuss the generalisability (external validity) of the study results                                                                                                                                        | 10     |
| <b>Other information</b> |     |                                                                                                                                                                                                              |        |
| Funding                  | 22  | Give the source of funding and the role of the funders for the present study and, if applicable, for the original study on which the present article is based                                                | 11     |

\*Give information separately for cases and controls in case-control studies and, if applicable, for exposed and unexposed groups in cohort and cross-sectional studies.

**Note:** An Explanation and Elaboration article discusses each checklist item and gives methodological background and published examples of transparent reporting. The STROBE checklist is best used in conjunction with this article (freely available on the Web sites of PLoS Medicine at <http://www.plosmedicine.org/>, Annals of Internal Medicine at <http://www.annals.org/>, and Epidemiology at <http://www.epidem.com/>). Information on the STROBE Initiative is available at [www.strobe-statement.org](http://www.strobe-statement.org).

# BMJ Open

## Are efforts to attract graduate applicants to UK medical schools effective in increasing the participation of under-represented socioeconomic groups? A national cohort study.

|                                 |                                                                                                                                                                                                                                                                                                                                                                                                                                                                                                                                                                                                                |
|---------------------------------|----------------------------------------------------------------------------------------------------------------------------------------------------------------------------------------------------------------------------------------------------------------------------------------------------------------------------------------------------------------------------------------------------------------------------------------------------------------------------------------------------------------------------------------------------------------------------------------------------------------|
| Journal:                        | <i>BMJ Open</i>                                                                                                                                                                                                                                                                                                                                                                                                                                                                                                                                                                                                |
| Manuscript ID                   | bmjopen-2017-018946.R2                                                                                                                                                                                                                                                                                                                                                                                                                                                                                                                                                                                         |
| Article Type:                   | Research                                                                                                                                                                                                                                                                                                                                                                                                                                                                                                                                                                                                       |
| Date Submitted by the Author:   | 12-Dec-2017                                                                                                                                                                                                                                                                                                                                                                                                                                                                                                                                                                                                    |
| Complete List of Authors:       | Kumwenda, Ben; University of Aberdeen, Centre for Healthcare Education Research and Innovation, School of Medicine, Medical Sciences and Nutrition<br>Cleland, Jennifer; University of Aberdeen, Centre for Healthcare Education Research and Innovation; University of Aberdeen, School of Medicine, Medical Sciences and Nutrition<br>Greatrix, Rachel; University of Nottingham School of Medicine<br>MacKenzie, Rhoda; University of Aberdeen School of Medicine and Dentistry, Institute of Education in Medical and Dental Sciences<br>Prescott, Gordon; University of Aberdeen, Medical Statistics Team |
| <b>Primary Subject Heading</b>: | Medical education and training                                                                                                                                                                                                                                                                                                                                                                                                                                                                                                                                                                                 |
| Secondary Subject Heading:      | Medical education and training                                                                                                                                                                                                                                                                                                                                                                                                                                                                                                                                                                                 |
| Keywords:                       | Medical school admissions, Graduates, UKCAT, Widening access, Statistical analysis                                                                                                                                                                                                                                                                                                                                                                                                                                                                                                                             |
|                                 |                                                                                                                                                                                                                                                                                                                                                                                                                                                                                                                                                                                                                |

SCHOLARONE™  
Manuscripts

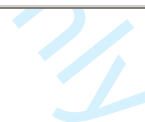

1  
2  
3 **Are efforts to attract graduate applicants to UK medical schools effective in increasing the**  
4 **participation of under-represented socioeconomic groups? A national cohort study.**  
5

6 Kumwenda B<sup>1</sup>, Cleland JA<sup>1</sup>, Greatrix R<sup>2</sup>, Mackenzie RK<sup>1</sup>, Prescott GJ<sup>3</sup>  
7  
8

9 <sup>1</sup> Centre for Healthcare Education Research and Innovation, Institute of Education for Medical and  
10 Dental Sciences, School of Medicine, Medical Sciences & Nutrition, University of Aberdeen, UK

11 <sup>2</sup> UKCAT Consortium, <https://www.ukcat.ac.uk/>  
12

13 <sup>3</sup> Medical Statistics Team, School of Medicine, Medical Sciences & Nutrition, University of Aberdeen,  
14 UK  
15  
16

17  
18  
19  
20 Corresponding author:

21 Ben Kumwenda

22 Centre for Healthcare Education Research and Innovation

23 Institute of Education for Medical and Dental Sciences,

24 Polwarth Building,

25 University of Aberdeen,

26 Foresterhill,

27 Aberdeen, UK

28 AB25 2ZD

29 Email: [r01bk15@abdn.ac.uk](mailto:r01bk15@abdn.ac.uk)

30 Tel: 01224437090  
31  
32  
33

34  
35  
36  
37  
38  
39 Keywords:

40 Medical admissions, Graduate, UKCAT, admissions, widening access, statistical analysis.  
41  
42  
43  
44  
45  
46  
47  
48  
49  
50  
51  
52  
53  
54  
55  
56  
57  
58  
59  
60

## ABSTRACT

### Introduction

Attracting graduates was recommended as a means of diversifying the UK medical student population. Graduates now make up nearly a quarter of the total medical student population. Research to date has focused on comparing the socio-demographic characteristics of applicants to and/or students on traditional and graduate entry programmes (GEMs), yet GEMs account for only 40% of the graduate medical student population. Thus, we aimed to compare the socio-demographic characteristic and outcomes of graduates and non-graduate applicants across a range of programmes.

### Methods

This was an observational study of 117214 applicants to medicine who took the UKCAT from 2006 to 2014, and who applied to medical school through UCAS. We included applicant demographics, UKCAT total score and offers in our analysis. Applicants were assigned as graduates or non-graduates on the basis of their highest qualification. Multiple logistic regression was used to predict the odds of receiving an offer, after adjusting for confounders.

### Results

Irrespective of graduate or non-graduate status, most applicants were from the highest socio-economic groups and were from a white ethnic background. Receiving an offer was related to gender and ethnicity in both graduates and non-graduates. After adjusting for UKCAT score, the odds ratio of an offer for graduates vs. non-graduates was approximately 0.5 (OR=0.48, 95% CI 0.46-0.49).

### Discussion

Our findings indicate that the aim of diversifying the medical student population on socio-economic grounds by attracting graduates has been only marginally successful. Graduate applicants from widening access backgrounds are less likely than others to be offered a place at medical school. Different approaches must be considered if medicine is to attract and select more socially diverse applicants.

*269 words*

**Strength and limitations of this study:**

- A large multi-cohort study to look at the population of graduate applicants to UK medical schools, including those on Graduate Entry Programme (GEM) and traditional programmes.
- The study uses a contemporary dataset to examine the socio-economic differences of those who apply to medical school; and it is important to know more about who *applies*, as medical schools can only select from the pool of applicants.
- The study examines what socio-demographic factors are associated with receiving an offer to study medicine, and whether these differ in graduates and non-graduates.
- Measures of socio-economic status are self-declared and there was a large proportion of missing socio-economic data for the graduate sub-group.
- Allocating students to an occupational group that depends on their family circumstances (area, parental occupation) can be problematic, especially for mature applicants.

**INTRODUCTION**

Despite much activity, investment and policy directives, people from backgrounds perceived as disadvantaged and minority, ethnic and cultural groups, remain under-represented, or excluded from medicine worldwide on the basis of, for example, their social class or ethnic origin.<sup>1-5</sup> In the UK, the vast majority of medical students come from the highest socio-economic groups<sup>6-9</sup>, and more than 20% of medical students have attended independent (usually fee paying) schools, compared to an average of 7% of all school pupils.<sup>10</sup> The professions have traditionally been dominated by those in high socioeconomic groups and this issue was summarised concisely in a report by the Independent Reviewer on Social Mobility and Child Poverty: 'Medicine . . . has a long way to go when it comes to making access fairer, diversifying its workforce and raising social mobility'.<sup>10</sup>

In the UK, most students enter medicine as school-leavers aged 17-20 years. In 1997, the UK Medical Workforce Standing Advisory Committee (MWSAC) recommended that one way of diversifying the medical student population was to attract graduates into medical schools.<sup>11</sup> The assumption behind this was that, by accepting students with more life experience, the diversity of students and hence doctors would be increased<sup>12-15</sup>, and this would result in more doctors willing to work in deprived and underserved areas.<sup>16-18</sup> This recommendation led to the introduction (in 2000) of the first four-year graduate entry medical courses (GEM), as well as a more general drive to encourage graduates into medicine.



1  
2  
3 Graduates now make up nearly a quarter of the contemporary UK medical student population.<sup>13,19</sup>  
4  
5 However, to date, there is relatively little information relating to whether, or not, attracting  
6 graduates has increased the diversity of medicine in the UK. Earlier studies tend to be single-site  
7 and/or focused on the relative performance of graduates versus school-leaver entrants.<sup>20-26</sup> In an  
8 exception to this, Mathers and colleagues carried out a large-scale study of applicants to 31 UK  
9 medical schools between 2002 and 2006 in order to determine whether the newly introduced GEM  
10 programmes had widened access to medicine.<sup>6</sup> They concluded that graduate entry programmes do  
11 attract more students from less affluent backgrounds than traditional five-year programmes but  
12 overall GEMs had not led to significant changes to the socio-economic profile of UK medical student  
13 population. It is possible, however, that this study was undertaken too soon after the establishment  
14 of the first GEM programmes to assess their true impact, given the typical time lag between policy  
15 implementation and impact on practice in education.<sup>27</sup>  
16  
17  
18  
19  
20  
21

22 Moreover, GEM programmes only account for about 10% of all medical programmes: there are more  
23 graduates in traditional five-year programmes than in GEM programmes. Yet, to the best of our  
24 knowledge, no previous studies have looked directly at the whole population of graduate medical  
25 students – that is, those on both GEM and traditional programmes.  
26  
27  
28

29 Finally, most studies have only looked at those graduates who were successful in obtaining a place at  
30 medical school.<sup>6,28</sup> It is also important to know more about who *applies*, as medical schools can only  
31 select from the pool of applicants.<sup>8</sup> In one of the few studies looking at both applicants and  
32 admissions, Garrud found some differences between both applicants and admissions to graduate-  
33 entry and traditional programmes, mostly in terms of ethnicity, but did not examine differences in  
34 terms of socio-economic markers.<sup>29</sup> This is, however, a complex area to investigate. There are issues  
35 surrounding these markers in graduate students, particularly given parental occupation is taken into  
36 account for school leavers, but occupation for graduates and older applicants may be that of the  
37 applicant themselves, particularly if they have been employed after leaving school or after a first  
38 degree. This ambiguity also holds for area of domicile (IMD: measured by postcode) as again that  
39 may be of the parental home or the home of the applicant for mature students and graduates.  
40 However, to attempt to address these gaps in the literature we used a contemporary dataset to  
41 compare the socio-demographic characteristics of graduates and non-graduate applicants to  
42 medicine. The main objective was to determine whether graduate and non-graduate applicants to  
43 medicine differ on a range of socio-demographic variables. Our second aim was to examine what  
44 socio-demographic factors are associated with receiving an offer to study medicine, and whether  
45 these differ in graduates and non-graduates.  
46  
47  
48  
49  
50  
51  
52  
53  
54  
55  
56  
57  
58  
59  
60

## METHODS

### Study context

Data were obtained from the UKCAT database which comprises data from two sources: UCAS and UKCAT (<http://www.ukcat.ac.uk/>). UKCAT is the UK Clinical Aptitude Test for applicants to medical and dental schools. UCAS is the Universities and Colleges Admissions Service, a UK-based organisation whose primary role is to operate the application process for British universities. Through the UCAS system (<https://www.ucas.com/>), candidates can apply to up to four medical courses out of five options in any one cycle, but there is no preference order of course choice. We compiled data for all candidates who sat the UKCAT between 2006 and 2014, and who applied to medical school through UCAS.

The UKCAT database only holds UCAS data relating to UKCAT candidates who have applied to a UKCAT University. Therefore, the data is a subset of graduate applicants to UK Universities. A number of graduate entry programmes use other admission tests (both BMAT and GAMSAT). Of the 16 graduate entry programmes in the UK, 7 require the UKCAT, 4 require GAMSAT, and one programme requires a BMAT.<sup>30</sup> The other four graduate entry programmes do not use any of these admission tests. Where UKCAT candidates have applied to non-UKCAT Universities these choices and the outcome of these choices are not known.

Although individuals can have multiple applications, within and between years, the socio-demographic variables presented in this study are per unique applicant. These variables include gender; ethnicity; domicile; secondary school attended, domicile (United Kingdom (UK), International, European Union (EU)). The socio-economic status (SES) of the candidates was determined by parental National Statistics Socio-Economic Classification (NS-SEC) and Index of Multiple Deprivation (IMD), an area-based measurement of material deprivation.

### Design and procedures

Access to the data was via a safe haven<sup>31</sup> (to ensure adherence to the highest standards of security, governance and confidentiality when storing, handling and analysing identifiable data). Ethical approval was not required because the focus of this study was a secondary analysis of anonymised data. Applicants who took the UK Clinical Aptitude Test (UKCAT) were notified that their data would be used for research purposes. Data files were merged into a single SPSS file for cleaning and

1  
2  
3 analysis. The online supplementary file 1 (*insert link supplementary file 1 here*) illustrates a flow  
4 diagram showing how the data files were merged from different source documents.  
5

6 The applications were assigned into two categories; graduate or non-graduate at the time of  
7 application. This was primarily based on applicants' highest qualification but some amendments  
8 were necessary. For example, where this information was missing, we imputed the outcome variable  
9 based on applicants' age and programme applied. For instance, all applicants aged less than 20 on  
10 their final UKCAT attempt were assumed to have applied shortly after leaving school; these were  
11 classified as school-leavers, or non-graduate applicants. Similarly, applicants with missing  
12 information on academic qualification, aged over 21 and had applied for a graduate entry  
13 programme were classified as 'graduates'. The outcome measures were the UKCAT score, and  
14 whether the applicant received an offer or not. We also considered all conditional and unconditional  
15 offers as an 'offer'.  
16  
17  
18  
19  
20  
21  
22  
23  
24  
25  
26

### 27 **Statistical analysis**

28 All the data were analysed using SPSS (IBM SPSS Statistics for Windows Version 22.0. Armonk, NY:  
29 IBM Corp). The results are reported in terms of numbers, percentages and mean (standard  
30 deviation) or median (interquartile range) as appropriate. The UKCAT scores were normally  
31 distributed. Therefore we used independent-samples t-test to compare the means between two  
32 groups. One-way analysis of variance (ANOVA) was used to compare means between more than two  
33 independent groups. A binary logistic regression analysis was employed to predict the odds of  
34 getting an offer from an application based on an applicant's graduate status. The specific factors we  
35 adjusted for in the regression models were: socio-economic status (NS-SEC and IMD), gender,  
36 graduate status, ethnicity and the total UKCAT score. The purpose was to assess the odds of  
37 receiving an offer for a graduate relative to a non-graduate after accounting for any differences in  
38 total UKCAT score. The analysis considered only the final application of each applicant to ensure  
39 independence (i.e., to control for those who made repeated applications).  
40  
41  
42  
43  
44  
45  
46  
47  
48  
49  
50  
51  
52  
53  
54  
55  
56  
57  
58  
59  
60

## RESULTS

From 2006 to 2014, the UKCAT database comprises 117214 applicants to medicine, applying through UCAS on a total of 146146 occasions (i.e. some applied in more than one cycle and hence sat the UKCAT more than once). The time-trend analysis shows that the proportion of graduate applicants to UK medical schools has risen from 8.5% in 2006 to 26.9% in 2013 (see supplementary file 2, time-trend analysis) (*insert link to supplementary file 2 here*). While dramatic, this increase is at least in part due to the increase in the number of institutions joining the UKCAT consortium, and thus more data supply. 23.6% of the applicants were graduates and 76.4% non-graduates. In general, there were more female graduate applicants than male applicants. The median age for the non-graduate applicants was 18 years and it was 23 years for the graduate applicants.

Table 1 summarises a comparison of graduate and non-graduate applicants by different sociodemographic factors. The main pattern across the two groups was that most applicants were from the highest socio-economic group, with nearly 80% of all applicants having a parent/guardian in the managerial and professional occupations. The groups were also similar in that one-fifth of the graduate and non-graduate applicants had attended a fee-paying (independent) school. (However, note that type of school was only available for one third of graduates and so this was not included in the later multivariable regression analysis with other covariates due to concern about bias and a lack of representativeness among graduates). The sample was predominantly of candidates from white ethnic backgrounds, for both graduates 64.3% (n=14014), and non-graduates 61.9% (n=47103). Around 7.7% of the graduates were classified as international applicants, as compared to 12.1% of the non-graduate applicants. The number of EU applicants was similar for both graduates (6.0%) and non-graduates (7.6%).

..... Table 1 about here.....

Non-graduate applicants performed significantly better on the UKCAT (2535.4 points, SD=268.2) than graduate applicants (2498.5 points, SD=285.7),  $p < 0.001$ . Graduates and non-graduate applicants from the top 20% affluent neighbourhoods (IMD 'I') obtained better UKCAT scores than applicants from the 20% most deprived areas (IMD 'V'). The difference was approximately 200 points for graduate applicants, and the same margin was observed in the non-graduate group. A similar pattern was also observed with parental occupation classification (NS-SEC) categories with

1  
2  
3 the difference of over 100 UKCAT points between managerial and professional occupations and  
4 routine/semi-routine occupations.  
5

6 The proportion of applicants who received offers was substantially lower for graduates (27.7%) than  
7 it was for non-graduates (47.9%). Graduate applicants who received offers had significantly better  
8 mean UKCAT scores (2697.7 points, SD=244.39) compared to their non-graduate colleagues who  
9 received offers (2657.7 points, SD=235.3),  $p < 0.001$ . The pre-admission attainment information  
10 (UKCAT scores) is summarised in Table 2.  
11  
12  
13  
14  
15

16  
17 ..... Table 2 about here.....  
18

19 A binary logistic regression analysis was employed to predict the odds of getting an offer based on  
20 the applicant's highest qualification (graduate or not) and total UKCAT score. After adjusting for  
21 UKCAT score alone, the odds ratio of an offer for graduates vs. non-graduates was approximately 0.5  
22 (OR=0.48, 95% CI 0.46-0.49).  
23  
24  
25

26  
27 Several variables that were considered to be representative of widening participation (WP)  
28 backgrounds were included in univariate analyses. The multiple logistic regression analysis was  
29 repeated including, in addition to UKCAT and graduate status, only those variables that were  
30 statistically significant ( $p \leq 0.05$ ) when associated with offer status. The specific factors were gender,  
31 ethnicity and socio-economic class (IMD and NS-SEC). We also tested for interaction of these factors  
32 which enabled us to ask whether graduates from different socio-economic backgrounds were more  
33 or less likely to receive offers. The overall model performance, using *Nagelkerke's R<sup>2</sup>* ranged from  
34 0.20 to 0.23 across the models developed. Results of the two-way interaction terms (Table 3)  
35 showed that after adjusting for other factors, the additional effect of socio-economic disadvantage  
36 for graduates (compared to non-graduates) was small and did not reach statistical significance  
37 ( $p = 0.69$  for the interaction of graduate status and IMD;  $p = 0.22$  for the interaction of graduate status  
38 and parental occupation (NS-SEC)). The result suggests that the association between socio-  
39 economic disadvantage and the likelihood of getting an offer for medical school affected graduates  
40 and non-graduates in a similar way.  
41  
42  
43  
44  
45  
46  
47  
48

49 ..... Table 3 about here.....  
50

51 ----insert figures 1,2,3 about here----  
52  
53

54 Figure 1 gives a graphical summary of the results from final model. In general, the odds of getting an  
55 offer to study medicine were lower if the applicant was male, graduate, from black and minority  
56  
57

1  
2  
3 ethnic (BME) background, and from lower socioeconomic groups (NS-SEC1, and IMD 'I' – least  
4 affluent neighbourhood). Figures 2 and 3 give a graphical summary of the odds ratio after separating  
5 graduates and non-graduates, to help further illustrate the difference between the two groups. For  
6 the non-graduates, the pattern is almost the same as the combined model in that the odds of getting  
7 an offer were higher if the applicant was female, from white ethnic background, and from high  
8 socioeconomic groups (NS-SEC1, and IMD I – most affluent neighbourhood). Some explanation for  
9 this pattern is because the non-graduates were in such a high proportion of the whole group. In  
10 comparison, for graduates, the predictor values that stand out are gender and ethnicity. However,  
11 notably, nearly a quarter of graduate applicants had a missing combination of socio-economic profile  
12 data (NS-SEC and IMD) which may explain why SES measures were less important predictors for  
13 graduates.  
14  
15  
16  
17  
18  
19  
20  
21

## 22 DISCUSSION

23  
24  
25 In this analysis of a large, multi-cohort contemporary dataset, we examined differences between  
26 graduates and non-graduate applicants to UK medical schools. Unlike previous studies in this area,  
27 we compared a larger sample of graduate applicants with non-graduates, rather than comparing by  
28 course (traditional versus GEM). This allowed us to capture the characteristics of a broader group of  
29 graduate applicants compared to earlier studies. Our results show that graduate and non-graduate  
30 applicants to UK medical schools are very similar on a range of socio-demographic markers, including  
31 multiple markers of socio-economic status. This indicates that, even with time and much investment  
32 in GEM courses, the aim of diversifying the medical student population on socio-economic grounds  
33 by attracting graduates has not been successful.<sup>6</sup>  
34  
35  
36  
37  
38  
39

40 Interestingly, unlike previous studies<sup>29</sup>, we did not identify any differences across graduates and  
41 non-graduates in terms of ethnicity. This may represent a change in the medical student population  
42 overall or may be an artefact of study design given that we looked at graduates in all medical  
43 programmes, not just GEM programmes.  
44  
45  
46

47 We also looked at who received an offer. Put simple, non-graduates were twice as likely to receive  
48 an offer as graduates. The patterns across non-graduates and graduates were similar in terms of  
49 gender and ethnicity but, in non-graduates, offers to study medicine were higher if the applicant was  
50 from a higher socio-economic group. However, measures of socio-economic status are self-declared  
51 and there was a large proportion of missing socio-economic data for the graduate sub-group. This  
52 reflects patterns seen in other similar studies.<sup>32-36</sup> Given the high proportion of missing data it would  
53  
54  
55  
56  
57  
58  
59  
60

1  
2  
3 be misleading to conclude that IMD and NS-SEC are weaker predictors for assessing the likelihood of  
4 getting an offer among graduate applicants because many graduate applicants were excluded from  
5 the logistic regression analysis and the missing data could also have led to insufficient power to  
6 detect smaller effects. Moreover, allocating students to an occupational group that depends on their  
7 family circumstances (area, parental occupation) can be problematic, especially for mature  
8 students.<sup>37,38</sup> However, we had no other measures available to us: no matter how limited<sup>32,34</sup>, those  
9 used are the 'basic units' that indicate educational disadvantage in the UK. We urge organisations  
10 such as UCAS and UKCAT to explore ways of improving self-declared data reporting, and government  
11 bodies such as the UK's Office for National Statistics to explore more effective measures of socio-  
12 economic status.  
13  
14  
15  
16  
17  
18

19 Overall, we found that graduates were proportionally less likely to receive an offer than non-  
20 graduate applicants, and those graduates who were offered places had significantly higher UKCAT  
21 scores than their non-graduate equivalents. We know from earlier studies<sup>29</sup> and contemporary  
22 routine data that the average competition, or selection, ratios for GEM programmes are significantly  
23 higher than for traditional five-year programmes. Moreover, GEM selection processes also tend to  
24 place more weight on UKCAT performance than do traditional programmes typically (this is  
25 associated with school leaving examinations being potentially less discriminatory for graduates - who  
26 would have taken these exams in earlier years, when it was less common to achieve top grades<sup>39</sup>).  
27 These factors may explain this outcome. However, future research which compares selection ratios  
28 for non-graduates and graduates by programme would provide a more nuanced understanding of  
29 differences across groups. Additionally, future studies could also look more closely at graduate and  
30 non-graduate patterns of performance in the various stages of medical school selection for the high  
31 number of graduates applying to traditional programmes. For example, we do not know whether  
32 graduates and non-graduates with equivalent grades and UKCAT scores are invited to interview,  
33 then graduates "fall down" at that stage. These studies would address concerns in the wider  
34 education literature that graduates and non-graduates are judged differently.<sup>40</sup>  
35  
36  
37  
38  
39  
40  
41  
42  
43  
44

45 The present study has various limitations that must be taken into consideration when interpreting  
46 findings. It was not possible to compare prior attainment across graduate and non-graduate groups  
47 with any confidence in this study because of the different weightings given to school and degree  
48 qualifications. However, this is a tricky comparison at the best of times (see above - graduates by  
49 their very nature have taken the school leaving exams which are typically used in medical selection  
50 to indicate prior attainment some years previous to their non-graduate counterparts). The issue of  
51 comparing "apples and oranges" arises as over recent years the average A level score has  
52 progressively risen ("grade inflation").<sup>39,41,42</sup>  
53  
54  
55  
56  
57  
58  
59  
60

1  
2  
3 In conclusion, the aim of diversifying the medical student population on socio-economic grounds by  
4 attracting graduates has been only marginally successful, with very minor positive trends in all areas.  
5 It may be that to draw a more diverse group of graduates into medicine requires different selection  
6 criteria for this group, one that places appreciable weight on the degree qualification and other  
7 graduate attributes, such as experience and passion for medicine. However, to change the selection  
8 process of graduates or indeed any group requires a shift towards affirmative action and/or a  
9 commitment to increase diversity. There appears to be little appetite for the former in the UK even  
10 though there is some evidence from other contexts that students from minority populations enrich  
11 the teaching environment of a medical school and may be more likely to practice in underserved  
12 areas.<sup>43-45</sup>  
13  
14  
15  
16  
17  
18  
19  
20  
21  
22  
23  
24

### 25 **Contributions**

26 We thank UKCAT for releasing the data for this project via a competitive bid process. We are also  
27 grateful to Dr Sally Curtis (University of Southampton) for the general advice throughout the project.  
28  
29  
30  
31  
32

### 33 **COMPETING INTERESTS AND FUNDING**

34 This study is part of Ben Kumwenda's doctoral programme of research funded by the UKCAT  
35 Research Panel, of which JC is a member and RG the Administrator.  
36  
37  
38  
39  
40

### 41 **ETHICAL PERMISSION**

42 The Chair of the local ethics committee ruled that formal ethical approval was not required for this  
43 study given the fully anonymised data was held in safe haven and all students who sit UKCAT are  
44 informed that their data and results will be used in educational research.  
45  
46  
47  
48  
49  
50

### 51 **AUTHOR CONTRIBUTIONS**

52 RMcK led the funding bid which was co-written by JC and GP, and reviewed by RG. RG advised on  
53 the nature of the data. BK managed the data, and planned and carried out the data analysis under  
54  
55  
56  
57  
58  
59  
60



1  
2  
3 the supervision of GP. JC guided the first draft of the introduction and discussion sections of this  
4  
5 paper. BK and GP wrote the first drafts of the methods and results sections. JC edited the drafts. All  
6  
7 authors reviewed and agreed the final draft of the paper.  
8  
9

#### 10 11 **DATA SHARING** 12

13 No additional data is available as the datasets are held in safe haven.  
14  
15  
16  
17  
18  
19  
20  
21  
22  
23  
24  
25  
26  
27  
28  
29  
30  
31  
32  
33  
34  
35  
36  
37  
38  
39  
40  
41  
42  
43  
44  
45  
46  
47  
48  
49  
50  
51  
52  
53  
54  
55  
56  
57  
58  
59  
60

For peer review only

**REFERENCES**

1. Castillo-Page L. Diversity in Medical Education: Facts & Figures. Washington DC: Association of American Medical Colleges; 2012.
2. Milburn A. University Challenge: How Higher Education Can Advance Social Mobility. London: Cabinet Office; 2012.
3. Cleland J, Dowell J, McLachlan J, Nicholson S, Patterson F. Identifying best practice in the selection of medical students: A project commissioned by the General Medical Council; 2012.
4. Larkins S, Michielsen K, Iputo J, et al. Impact of selection strategies on representation of underserved populations and intention to practise: International findings. *Medical Education* 2015;49:60-72.
5. Behrendt. L, Larkin. S, Griew. R, Kelly. P. Review of Higher Education Access and Outcomes for Aboriginal and Torres Strait Islander People Final Report. Canberra, Australia: Australian Government Department of Education and Training; 2012.
6. Mathers J, Sitch A, Marsh JL, Parry J. Widening access to medical education for under-represented socioeconomic groups: population based cross sectional analysis of UK data, 2002-6. *British Medical Journal* 2011;342:7.
7. Griffin B, Hu W. The interaction of socio-economic status and gender in widening participation in medicine. *Medical education* 2015;49:103-13.
8. Steven K, Dowell J, Jackson C, Guthrie B. Fair access to medicine? Retrospective analysis of UK medical schools application data 2009-2012 using three measures of socioeconomic status. *Bmc Medical Education* 2016;16:10.
9. Nicholson S, Cleland JA. "It's making contacts": notions of social capital and implications for widening access to medical education. *Advances in Health Sciences Education* 2016:1-14.
10. Independent Reviewer on Social Mobility and Child Poverty. Fair Access to Professional Careers. London: Cabinet Office; 2012.
11. Medical Workforce Standing Advisory committee. Planning the Medical Workforce. Third Report. London: Department of Health; 1997.
12. Wilkinson TJ, Wells JE, Bushnell JA. Are differences between graduates and undergraduates in a medical course due to age or prior degree (vol 38, pg 1141, 2004). *Medical Education* 2005;39:1141-6.
13. Peile E, George C. Should all medical students be graduates first? *British Medical Journal* 2007;335:1072-3.
14. Carter YH, Peile E. Graduate entry medicine: high aspirations at birth. *Clinical Medicine* 2007;7:143-7.
15. British Medical Association. Equality and Diversification in UK Medical Schools. London: BMA; 2009.
16. Dowell J, Norbury M, Steven K, Guthrie B. Widening access to medicine may improve general practitioner recruitment in deprived and rural communities: survey of GP origins and current place of work. *BMC Medical Education* 2015;15:165.
17. Puddey IB, Playford DE, Mercer A. Impact of medical student origins on the likelihood of ultimately practicing in areas of low vs high socio-economic status. *Bmc Medical Education* 2017;17:13.
18. GP Taskforce. Securing the future of GP workforce. Delivering the Mandate on GP Expansion. GP taskforce final report; 2014.
19. Cleland J, Johnston PW, French FH, Needham G. Associations between medical school and career preferences in Year 1 medical students in Scotland. *Medical Education* 2012;46:473-84.
20. Niven V, Cabot LB, Gallagher JE. Widening participation - a comparison of the characteristics of successful UK applicants to the five-year and four-year dental programmes in 2007 and 2008. *British Dental Journal* 2013;214:117-22.
21. James D, Ferguson E, Powis D, et al. Graduate entry to medicine: widening psychological diversity. *Bmc Medical Education* 2009;9:8.

- 1  
2  
3 22. Elliott SL, Epstein J. Selecting the future doctors: the role of graduate medical programmes. *Internal Medicine Journal* 2005;35:174-7.
- 4  
5 23. Dodds AE, Reid KJ, Conn JJ, Elliott SL, McColl GJ. Comparing the academic performance of  
6 graduate- and undergraduate-entry medical students. *Medical Education* 2010;44:197-204.
- 7 24. Byrne AT, Arnett R, Farrell T, Sreenan S. Comparison of performance in a four year graduate  
8 entry medical programme and a traditional five/six year programme. *Bmc Medical Education*  
9 2014;14.
- 10 25. Casey D, Thomas S, Hocking DR, Kemp-Casey A. Graduate-entry medical students: older and  
11 wiser but not less distressed. *Australasian Psychiatry* 2016;24:88-92.
- 12 26. Calvert MJ, Ross NM, Freemantle N, Xu Y, Zvauya R, Parle JV. Examination performance of  
13 graduate entry medical students compared with mainstream students. *Journal of the Royal Society*  
14 *of Medicine* 2009;102:425-30.
- 15 27. Les B, Howard S. *Education Policy: Process, Themes and Impact*. New York: Routledge; 2006.
- 16 28. Rolfe IE, Ringland C, Pearson SA. Graduate entry to medical school? Testing some  
17 assumptions. *Medical Education* 2004;38:778-86.
- 18 29. Garrud P. Who applies and who gets admitted to UK graduate entry medicine? - an analysis  
19 of UK admission statistics. *Bmc Medical Education* 2011;11:4.
- 20 30. Medschoolsonline. at [http://www.medschoolsonline.co.uk/graduate-entry-](http://www.medschoolsonline.co.uk/graduate-entry-programme/)  
21 [programme/](http://www.medschoolsonline.co.uk/graduate-entry-programme/).(accessed May 2017)
- 22 31. HIC Safe Haven. Health Informatics Centre. 2016, at [http://medicine.dundee.ac.uk/hic-safe-](http://medicine.dundee.ac.uk/hic-safe-haven-0.)  
23 [haven-0.](http://medicine.dundee.ac.uk/hic-safe-haven-0.))
- 24 32. Do P, Parry J, Mathers J, Richardson M. Monitoring the widening participation initiative for  
25 access to medical school: are present measures sufficient? *Medical education* 2006;40:750-8.
- 26 33. Hoare A, Johnston R. Widening participation through admissions policy - a British case study  
27 of school and university performance. *Studies in Higher Education* 2011;36:21-41.
- 28 34. Boliver V, Gorard S, Siddiqui N. Will the Use of Contextual Indicators Make UK Higher  
29 Education Admissions Fairer? *Education Sciences* 2015;5:306.
- 30 35. MacKenzie RK, Dowell J, Ayansina D, Cleland JA. Do personality traits assessed on medical  
31 school admission predict exit performance? A UK-wide longitudinal cohort study. *Advances in Health*  
32 *Sciences Education* 2016:1-21.
- 33 36. James D, Ferguson E, Powis D, Symonds I, Yates J. Graduate entry to medicine: widening  
34 academic and socio-demographic access. *Medical Education* 2008;42:294-300.
- 35 37. Gorard S, Adnett N, May H, Slack K, Smith E, Thomas L. *Overcoming the barriers to higher*  
36 *education*. Stoke-on-Trent: Trentham Books; 2007.
- 37 38. Harrison N, Hatt S. Knowing the 'unknowns': investigating the students whose social class is  
38 not known at entry to higher education. *Journal of Further and Higher Education* 2009;33:347-57.
- 39 39. McManus IC, Powis DA, Wakeford R, Ferguson E, James D, Richards P. Intellectual aptitude  
40 tests and A levels for selecting UK school leaver entrants for medical school. *British Medical Journal*  
41 2005;331:555-9.
- 42 40. Blackstone T. Does Maturity Make a Difference? RESEARCH REPORT-POLICY STUDIES  
43 INSTITUTE 1997:38-45.
- 44 41. James D, Yates J, Nicholson S. Comparison of A level and UKCAT performance in students  
45 applying to UK medical and dental schools in 2006: cohort study. *British Medical Journal* 2010;340:7.
- 46 42. Johnes. G. Standards and grade inflation. In: Johnes. G, Johnes. J, eds. *International*  
47 *Handbook on the Economics of Education*. Cheltenham: Edward Elgar Publishing Ltd; 2004.
- 48 43. Xu G, Fields SK, Laine C, Veloski JJ, Barzansky B, Martini CJ. The relationship between the  
49 race/ethnicity of generalist physicians and their care for underserved populations. *American Journal*  
50 *of Public Health* 1997;87:817-22.
- 51 44. Whitla DK, Orfield G, Silen W, Teperow C, Howard C, Reede J. Educational benefits of  
52 diversity in medical school: A survey of students. *Academic Medicine* 2003;78:460-6.
- 53  
54  
55  
56  
57  
58  
59  
60

1  
2  
3  
4  
5  
6  
7  
8  
9  
10  
11  
12  
13  
14  
15  
16  
17  
18  
19  
20  
21  
22  
23  
24  
25  
26  
27  
28  
29  
30  
31  
32  
33  
34  
35  
36  
37  
38  
39  
40  
41  
42  
43  
44  
45  
46  
47  
48  
49  
50  
51  
52  
53  
54  
55  
56  
57  
58  
59  
60

45. Saha S, Guiton G, Wimmers PF, Wilkerson L. Student body racial and ethnic composition and diversity-related outcomes in US medical schools. *Jama-Journal of the American Medical Association* 2008;300:1135-45.

For peer review only

|                                    |                                             | BMJ Open     |        |          |      | Graduate    |        |       |      |
|------------------------------------|---------------------------------------------|--------------|--------|----------|------|-------------|--------|-------|------|
|                                    |                                             | Non-graduate |        | Graduate |      | Application |        | Offer |      |
|                                    |                                             | Application  |        | Offer    |      | Application |        | Offer |      |
|                                    |                                             | n            | %      | n        | %    | n           | %      | n     | %    |
| <b>Gender</b>                      |                                             |              |        |          |      |             |        |       |      |
|                                    | Female                                      | 49082        | 55.9   | 22716    | 56.2 | 13999       | 57.7   | 3812  | 56.7 |
|                                    | Male                                        | 38656        | 44.1   | 17702    | 43.8 | 10256       | 42.3   | 2910  | 43.3 |
|                                    | Total                                       | 87738        |        | 40418    |      | 24255       |        | 6722  |      |
| <b>Ethnicity II</b>                |                                             |              |        |          |      |             |        |       |      |
|                                    | Caucasian                                   | 47103        | 61.9   | 25421    | 69.8 | 14014       | 64.3   | 4831  | 78.3 |
|                                    | Non-Caucasian                               | 28941        | 38.1   | 10995    | 30.2 | 7765        | 35.6   | 1335  | 21.7 |
|                                    | Total                                       | 76044        |        | 36416    |      | 21779       |        | 6166  |      |
|                                    | Missing                                     | (11694)      | (13.3) |          |      | (2476)      | (10.2) |       |      |
| <b>School Attended<sup>‡</sup></b> |                                             |              |        |          |      |             |        |       |      |
|                                    | Fee Paying                                  | 17388        | 25.5   | 10184    | 29.2 | 1672        | 21.1   | 664   | 24.5 |
|                                    | Non-Fee Paying                              | 50796        | 74.5   | 24705    | 70.8 | 6249        | 78.9   | 2043  | 75.5 |
|                                    | Total                                       | 68184        |        | 34889    |      | 7921        |        | 2707  |      |
|                                    | Missing                                     | (2263)       | (3.2)  |          |      | (12988)     | (62.1) |       |      |
| <b>IMD Quintile<sup>‡</sup></b>    |                                             |              |        |          |      |             |        |       |      |
|                                    | 1                                           | 28518        | 34.6   | 14043    | 40   | 5972        | 26.2   | 1894  | 32   |
|                                    | 2                                           | 19202        | 23.3   | 8767     | 25   | 4693        | 20.6   | 1375  | 23.2 |
|                                    | 3                                           | 14986        | 18.2   | 6196     | 17.6 | 4450        | 19.6   | 1134  | 19.2 |
|                                    | 4                                           | 10883        | 13.2   | 3734     | 10.6 | 4261        | 18.7   | 959   | 16.2 |
|                                    | 5                                           | 8815         | 10.7   | 2394     | 6.8  | 3378        | 14.8   | 552   | 9.3  |
|                                    | Total                                       | 82404        |        | 35134    |      | 22754       |        | 5914  |      |
|                                    | Missing                                     | (1260)       | (1.5)  |          |      | (592)       | (2.5)  |       |      |
| <b>NS_SEC<sup>‡</sup></b>          |                                             |              |        |          |      |             |        |       |      |
|                                    | Managerial and Professional Occupations     | 61624        | 84.1   | 28025    | 87.9 | 15622       | 78.7   | 4406  | 83.3 |
|                                    | Intermediate Occupations                    | 3399         | 4.6    | 1337     | 4.2  | 1167        | 5.9    | 295   | 5.6  |
|                                    | Small Employers and Own Account Occupations | 4676         | 6.4    | 1501     | 4.7  | 1572        | 7.9    | 313   | 5.9  |
|                                    | Lower Supervisory and Technical Occupations | 1410         | 1.9    | 423      | 1.3  | 639         | 3.2    | 129   | 2.4  |
|                                    | Routine and Semi-Routine Occupations        | 2198         | 3      | 580      | 1.8  | 848         | 4.3    | 149   | 2.8  |
|                                    | Total                                       | 73307        |        | 31866    |      | 19848       |        | 5292  |      |
|                                    | Missing                                     | (10357)      | (12.4) |          |      | (3498)      | (15)   |       |      |
| <b>Domicile</b>                    |                                             |              |        |          |      |             |        |       |      |
|                                    | UK                                          | 70447        | 80.3   | 35333    | 88   | 20909       | 86.2   | 6051  | 90   |
|                                    | EU                                          | 6694         | 7.6    | 1078     | 2.7  | 1467        | 6      | 280   | 4.2  |
|                                    | International                               | 10597        | 12.1   | 3785     | 9.4  | 1879        | 7.7    | 391   | 5.8  |
|                                    | Total                                       | 87738        |        | 40418    |      | 24255       |        | 6722  |      |
| <b>UKCAT Attempt Number</b>        |                                             |              |        |          |      |             |        |       |      |
|                                    | 1                                           | 75049        | 85.5   | 34770    | 86   | 15562       | 64.2   | 4718  | 70.2 |
|                                    | 2                                           | 11803        | 13.5   | 5390     | 13.3 | 5722        | 23.6   | 1425  | 21.2 |
|                                    | 3+                                          | 886          | 1      | 258      | 0.6  | 2971        | 12.2   | 579   | 8.6  |
|                                    | Total                                       | 87738        |        | 40418    |      | 24255       |        | 6722  |      |
| <b>Final Outcome</b>               |                                             |              |        |          |      |             |        |       |      |
|                                    | No Offer                                    | 43964        | 52.1   |          |      | 14736       | 68.7   |       |      |
|                                    | Offer                                       | 40418        | 47.9   | 40418    |      | 6722        | 27.7   | 6722  |      |
|                                    | Total                                       | 84382        |        |          |      | 21458       |        |       |      |
|                                    | Missing                                     | (3356)       | (3.8)  |          |      | (2797)      | (11.5) |       |      |

<sup>‡</sup> Sample drawn from UK domiciled applicants only

| Table 2                                                                                                                                                                                                                                                                                   |                                             | Mean UKCAT Scores <sup>†</sup> |        |       |         |          |        |        |         |
|-------------------------------------------------------------------------------------------------------------------------------------------------------------------------------------------------------------------------------------------------------------------------------------------|---------------------------------------------|--------------------------------|--------|-------|---------|----------|--------|--------|---------|
|                                                                                                                                                                                                                                                                                           |                                             | Non-graduate                   |        |       |         | Graduate |        |        |         |
|                                                                                                                                                                                                                                                                                           |                                             | N                              | Mean   | SD    | P value | N        | Mean   | SD     | P value |
| <b>Gender</b>                                                                                                                                                                                                                                                                             |                                             |                                |        |       |         |          |        |        |         |
|                                                                                                                                                                                                                                                                                           | Female                                      | 49047                          | 2532.2 | 269.8 | <0.001  | 13974    | 2501.7 | 285.71 | <0.001  |
|                                                                                                                                                                                                                                                                                           | Male                                        | 38633                          | 2581.8 | 267.7 |         | 10241    | 2550.9 | 291.22 |         |
| <b>Ethnicity</b>                                                                                                                                                                                                                                                                          |                                             |                                |        |       |         |          |        |        |         |
|                                                                                                                                                                                                                                                                                           | Caucasian                                   | 47102                          | 2597.9 | 243.6 | <0.001  | 14000    | 2591.2 | 261.15 |         |
|                                                                                                                                                                                                                                                                                           | Non-Caucasian                               | 26298                          | 2512.1 | 282.0 |         | 7128     | 2402.3 | 294.32 |         |
| <b>School Attended<sup>‡</sup></b>                                                                                                                                                                                                                                                        |                                             |                                |        |       |         |          |        |        |         |
|                                                                                                                                                                                                                                                                                           | Fee Paying                                  | 17388                          | 2632.5 | 239.2 | <0.001  | 1670     | 2611.6 | 233.21 | <0.001  |
|                                                                                                                                                                                                                                                                                           | Non-Fee Paying                              | 50787                          | 2562.8 | 260.0 |         | 6233     | 2527.2 | 265.93 |         |
| <b>IMD Quintile<sup>‡</sup></b>                                                                                                                                                                                                                                                           |                                             |                                |        |       |         |          |        |        |         |
|                                                                                                                                                                                                                                                                                           | I                                           | 24427                          | 2627.9 | 237.8 | <0.001  | 5395     | 2600.4 | 263.94 | <0.001  |
|                                                                                                                                                                                                                                                                                           | II                                          | 16291                          | 2604.6 | 244.6 |         | 4206     | 2578.1 | 269.33 |         |
|                                                                                                                                                                                                                                                                                           | III                                         | 12505                          | 2576.7 | 253.6 |         | 3937     | 2531.5 | 273.30 |         |
|                                                                                                                                                                                                                                                                                           | IV                                          | 8936                           | 2516.6 | 269.3 |         | 3801     | 2479.3 | 298.79 |         |
|                                                                                                                                                                                                                                                                                           | V                                           | 7194                           | 2425.9 | 282.8 |         | 2990     | 2397.5 | 312.92 |         |
| <b>NSSEC<sup>‡</sup></b>                                                                                                                                                                                                                                                                  |                                             |                                |        |       |         |          |        |        |         |
|                                                                                                                                                                                                                                                                                           | Managerial and Professional Occupations     | 52555                          | 2604.1 | 249.0 | <0.001  | 14084    | 2560.6 | 281.44 | <0.001  |
|                                                                                                                                                                                                                                                                                           | Intermediate Occupations                    | 2784                           | 2568.7 | 246.3 |         | 1059     | 2541.3 | 272.21 |         |
|                                                                                                                                                                                                                                                                                           | Small Employers and Own Account Occupations | 3635                           | 2518.8 | 256.5 |         | 1367     | 2466.0 | 279.27 |         |
|                                                                                                                                                                                                                                                                                           | Lower Supervisory and Technical Occupations | 1181                           | 2486.6 | 259.5 |         | 551      | 2448.9 | 296.20 |         |
|                                                                                                                                                                                                                                                                                           | Routine and Semi-Routine Occupations        | 1775                           | 2465.0 | 270.2 |         | 740      | 2441.2 | 276.38 |         |
| <b>Number of attempts</b>                                                                                                                                                                                                                                                                 |                                             |                                |        |       |         |          |        |        |         |
|                                                                                                                                                                                                                                                                                           | 1                                           | 75000                          | 2541.7 | 272.9 | <0.001  | 15554    | 2507.5 | 299.42 | <0.001  |
|                                                                                                                                                                                                                                                                                           | 2                                           | 11798                          | 2628.4 | 237.9 |         | 5711     | 2552.7 | 273.84 |         |
|                                                                                                                                                                                                                                                                                           | 3 or more                                   | 882                            | 2604.4 | 256.0 |         | 2950     | 2543.5 | 254.43 |         |
| <b>Final Outcome</b>                                                                                                                                                                                                                                                                      |                                             |                                |        |       |         |          |        |        |         |
|                                                                                                                                                                                                                                                                                           | No offer                                    | 43925                          | 2455.6 | 265.2 | <0.001  | 14713    | 2443.9 | 278.01 | <0.001  |
|                                                                                                                                                                                                                                                                                           | Offer                                       | 40405                          | 2657.7 | 235.3 |         | 6711     | 2697.7 | 244.39 |         |
| <sup>†</sup> The numbers presented here are the mean scores based on the applicants' last UKCAT sitting. However, the counts of applicants are not the same as in table 1 because some applicants had missing UKCAT scores<br><sup>‡</sup> Sample drawn from UK domiciled applicants only |                                             |                                |        |       |         |          |        |        |         |

**Table 3: Multiple logistic regression for offers to medical school 2007 - 2014**

|                                                               |                                                           | Model 1, $R^2=0.22$ , |       |       | Model 2, $R^2=0.21$ |       |       | Model 3, $R^2=0.22$ |       |       | Model 4 $R^2=0.22$ |       |       |
|---------------------------------------------------------------|-----------------------------------------------------------|-----------------------|-------|-------|---------------------|-------|-------|---------------------|-------|-------|--------------------|-------|-------|
|                                                               |                                                           | OR                    | Lower | Upper | OR                  | Lower | Upper | OR                  | Lower | Upper | OR                 | Lower | Upper |
| <b>UKCAT</b>                                                  |                                                           | 1.032                 | 1.032 | 1.033 | 1.032               | 1.032 | 1.033 | 1.032               | 1.032 | 1.033 | 1.032              | 1.032 | 1.033 |
| <b>Graduate Status</b>                                        | Non-graduate (default)                                    | 1                     |       |       | 1                   |       |       | 1                   |       |       | 1                  |       |       |
|                                                               | Graduate                                                  | 0.429                 | 0.399 | 0.461 | 0.438               | 0.419 | 0.458 | 0.441               | 0.421 | 0.463 | 0.450              | 0.432 | 0.468 |
| <b>Gender</b>                                                 | Female (default)                                          | 1                     |       |       | 1                   |       |       | 1                   |       |       |                    |       |       |
|                                                               | Male                                                      | 0.830                 | 0.803 | 0.857 | 0.830               | 0.803 | 0.857 | 0.830               | 0.804 | 0.857 | 0.830              | 0.804 | 0.857 |
| <b>Ethnicity</b>                                              | White (default)                                           | 1                     |       |       | 1                   |       |       | 1                   |       |       | 1                  |       |       |
|                                                               | Asian                                                     | 0.781                 | 0.750 | 0.813 | 0.780               | 0.748 | 0.812 | 0.774               | 0.741 | 0.809 | 0.780              | 0.748 | 0.812 |
|                                                               | Black                                                     | 0.574                 | 0.527 | 0.625 | 0.572               | 0.525 | 0.623 | 0.544               | 0.495 | 0.598 | 0.572              | 0.525 | 0.623 |
|                                                               | Mixed                                                     | 0.823                 | 0.756 | 0.896 | 0.823               | 0.756 | 0.896 | 0.808               | 0.736 | 0.888 | 0.823              | 0.756 | 0.896 |
|                                                               | Other                                                     | 0.804                 | 0.718 | 0.900 | 0.803               | 0.717 | 0.899 | 0.818               | 0.722 | 0.927 | 0.803              | 0.717 | 0.900 |
| <b>Index of Multiple Deprivation (IMD)</b>                    | I = Most affluent (default)                               | 1                     |       |       | 1                   |       |       | 1                   |       |       | 1                  |       |       |
|                                                               | II                                                        | 0.917                 | 0.876 | 0.960 | 0.921               | 0.884 | 0.960 | 0.921               | 0.884 | 0.960 | 0.921              | 0.884 | 0.960 |
|                                                               | III                                                       | 0.866                 | 0.823 | 0.911 | 0.869               | 0.830 | 0.909 | 0.869               | 0.830 | 0.909 | 0.868              | 0.830 | 0.909 |
|                                                               | IV                                                        | 0.775                 | 0.731 | 0.823 | 0.808               | 0.766 | 0.852 | 0.806               | 0.765 | 0.850 | 0.806              | 0.764 | 0.850 |
|                                                               | V - Least affluent                                        | 0.707                 | 0.657 | 0.760 | 0.724               | 0.679 | 0.773 | 0.723               | 0.678 | 0.771 | 0.723              | 0.677 | 0.771 |
| <b>Parental Occupation NS-SEC</b>                             | 1 - Managerial and Professional Occupations (default)     | 1                     |       |       | 1                   |       |       | 1                   |       |       |                    |       |       |
|                                                               | II - Intermediate Occupations                             | 0.891                 | 0.828 | 0.960 | 0.879               | 0.808 | 0.956 | 0.891               | 0.828 | 0.960 | 0.891              | 0.827 | 0.960 |
|                                                               | III - Small Employers and Own Account Occupations         | 0.854                 | 0.797 | 0.914 | 0.829               | 0.768 | 0.894 | 0.852               | 0.796 | 0.912 | 0.853              | 0.796 | 0.913 |
|                                                               | IV - Lower Supervisory and Technical Occupations          | 0.768                 | 0.684 | 0.862 | 0.709               | 0.621 | 0.809 | 0.766               | 0.683 | 0.860 | 0.767              | 0.683 | 0.860 |
|                                                               | V - Routine and Semi-Routine Occupations                  | 0.766                 | 0.693 | 0.847 | 0.732               | 0.654 | 0.820 | 0.765               | 0.692 | 0.845 | 0.764              | 0.691 | 0.844 |
| <b>Graduate status by Index of multiple deprivation (IMD)</b> | Graduate-by-IMD I - Most affluent neighbourhood (default) | 1                     |       |       |                     |       |       |                     |       |       |                    |       |       |
|                                                               | Graduate vs IMD_II                                        | 1.030                 | 0.922 | 1.150 |                     |       |       |                     |       |       |                    |       |       |
|                                                               | Graduate vs IMD_III                                       | 1.021                 | 0.909 | 1.147 |                     |       |       |                     |       |       |                    |       |       |
|                                                               | Graduate vs IMD_IV                                        | 1.189                 | 1.049 | 1.348 |                     |       |       |                     |       |       |                    |       |       |
| <b>p=0.69</b>                                                 | Graduate vs IMD_V - Least affluent neighbourhood          | 1.112                 | .957  | 1.293 |                     |       |       |                     |       |       |                    |       |       |
| <b>Graduate status by parental occupation (NS-SEC)</b>        | Graduate-by-NS-SEC - I (default)                          |                       |       |       | 1                   |       |       |                     |       |       |                    |       |       |
|                                                               | Graduate by NS-SEC - II                                   |                       |       |       | 1.068               | 0.893 | 1.276 |                     |       |       |                    |       |       |

1  
2  
3  
4  
5  
6  
7  
8  
9  
10  
11  
12  
13  
14  
15  
16  
17  
18  
19  
20  
21  
22  
23  
24  
25  
26  
27  
28  
29  
30  
31  
32  
33  
34  
35  
36  
37  
38  
39  
40  
41  
42  
43  
44  
45  
46  
47

|                                     |                                |  |  |  |       |       |       |       |       |       |  |  |  |
|-------------------------------------|--------------------------------|--|--|--|-------|-------|-------|-------|-------|-------|--|--|--|
| <b>p=0.22</b>                       | Graduate by NS-SEC - III       |  |  |  | 1.149 | 0.974 | 1.355 |       |       |       |  |  |  |
|                                     | Graduate by NS-SEC - IV        |  |  |  | 1.383 | 1.064 | 1.797 |       |       |       |  |  |  |
|                                     | Graduate by NS-SEC - V         |  |  |  | 1.211 | 0.959 | 1.530 |       |       |       |  |  |  |
| <b>Graduate status by Ethnicity</b> | Graduate-by-White (default)    |  |  |  |       |       |       | 1     |       |       |  |  |  |
|                                     | Graduate by Asian              |  |  |  |       |       |       | 1.039 | 0.931 | 1.160 |  |  |  |
|                                     | Graduate by Black              |  |  |  |       |       |       | 1.300 | 1.060 | 1.593 |  |  |  |
|                                     | Graduate by Mixed              |  |  |  |       |       |       | 1.101 | 0.885 | 1.371 |  |  |  |
| <b>p=0.10</b>                       | Graduate by Other ethnic group |  |  |  |       |       |       | 0.900 | 0.668 | 1.211 |  |  |  |

Model 1: Shows the interaction of graduate status by area deprivation (IMD), note non-significant value of p=0.69  
 Model 2: Shows the interaction of graduate status by parental occupation (NS-SEC), note non-significant value of p=0.22  
 Model 3: Shows the interaction of graduate status by ethnicity, note the non-significant value p=0.10  
 Model 4: Is the final model of all covariates, note all values are statistically significant, p<0.001

Figure Legends:

Title: Odds of an application resulting in offer of a place according to selected sociodemographic characteristics,

Figure 1: Odds Ratio, Final Model (all applicants)

Figure 2: Odds Ratio, Non-graduate Applicants

Figure 3: Odd Ratio, Graduate Applicants



1  
2  
3  
4  
5  
6  
7  
8  
9  
10  
11  
12  
13  
14  
15  
16  
17  
18  
19  
20  
21  
22  
23  
24  
25  
26  
27  
28  
29  
30  
31  
32  
33  
34  
35  
36  
37  
38  
39  
40  
41  
42  
43  
44  
45  
46  
47  
48  
49  
50  
51  
52  
53  
54  
55  
56  
57  
58  
59  
60



Figure 1

209x148mm (300 x 300 DPI)

View only

1  
2  
3  
4  
5  
6  
7  
8  
9  
10  
11  
12  
13  
14  
15  
16  
17  
18  
19  
20  
21  
22  
23  
24  
25  
26  
27  
28  
29  
30  
31  
32  
33  
34  
35  
36  
37  
38  
39  
40  
41  
42  
43  
44  
45  
46  
47  
48  
49  
50  
51  
52  
53  
54  
55  
56  
57  
58  
59  
60



Figure 2

209x148mm (300 x 300 DPI)

1  
2  
3  
4  
5  
6  
7  
8  
9  
10  
11  
12  
13  
14  
15  
16  
17  
18  
19  
20  
21  
22  
23  
24  
25  
26  
27  
28  
29  
30  
31  
32  
33  
34  
35  
36  
37  
38  
39  
40  
41  
42  
43  
44  
45  
46  
47  
48  
49  
50  
51  
52  
53  
54  
55  
56  
57  
58  
59  
60



Figure 3

209x148mm (300 x 300 DPI)

Flow diagram showing data linkage for applicants to UKCAT consortium universities between 2006 - 2014



Chart 1 (group percentages)

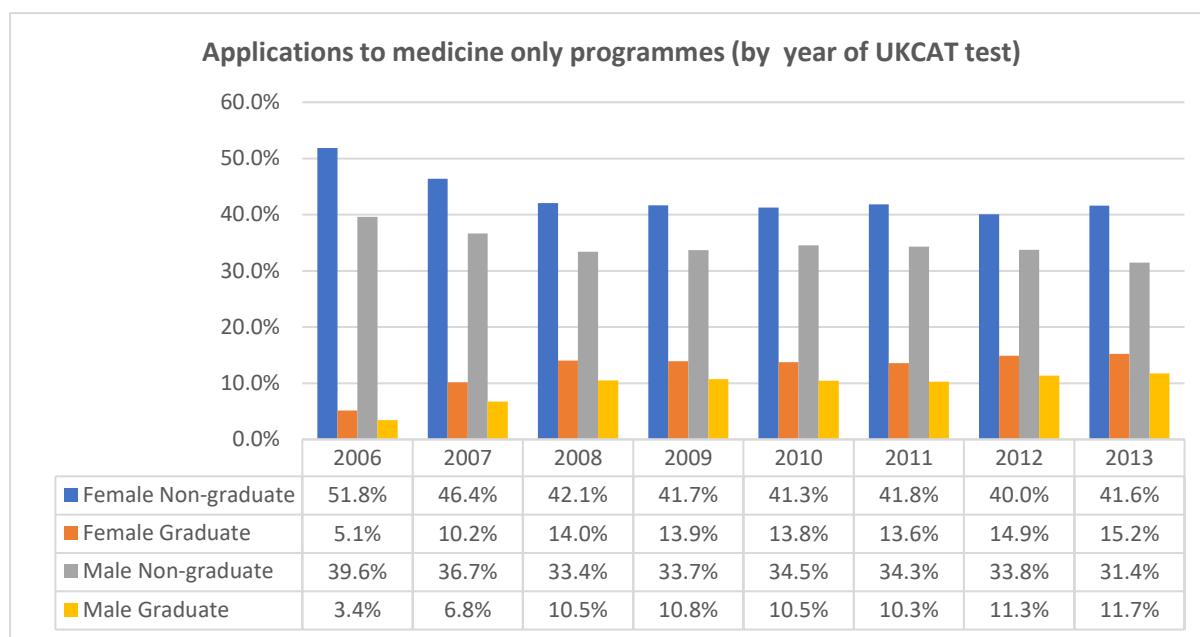

Chart 2 (raw figures)

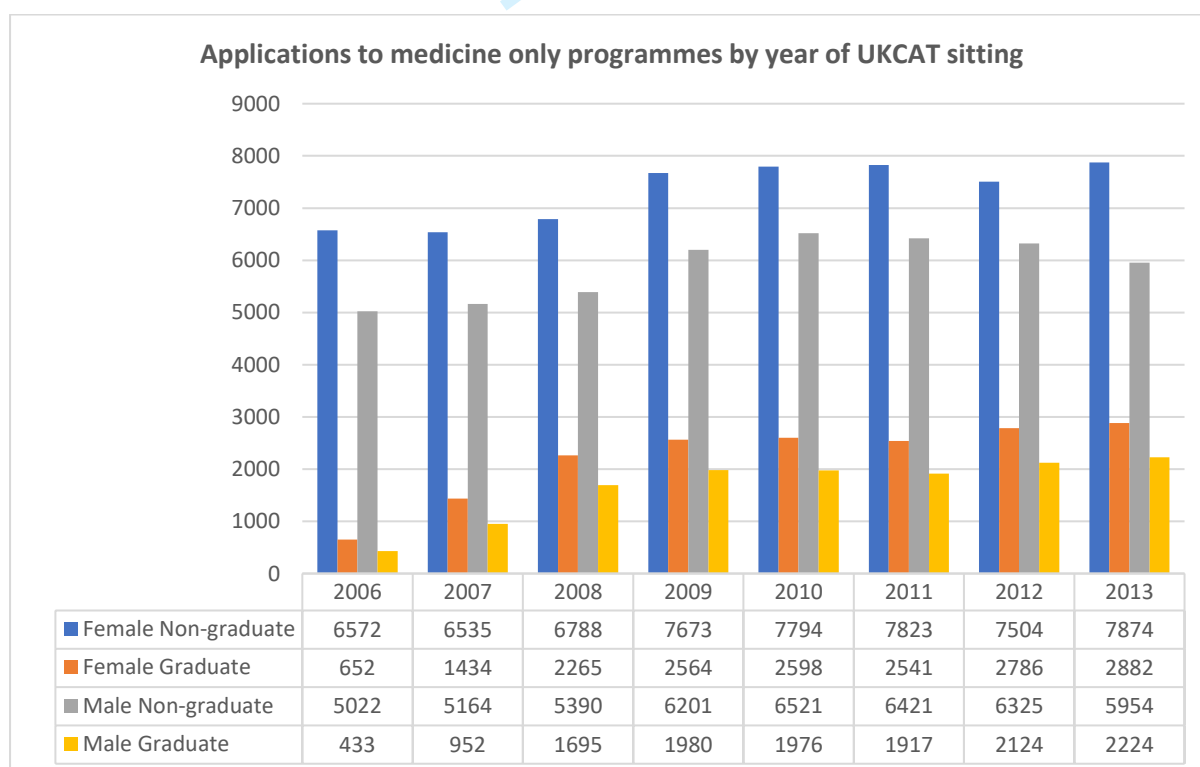

**STROBE 2007 (v4) Statement—Checklist of items that should be included in reports of cohort studies**

| Section/Topic             | Item # | Recommendation                                                                                                                                                                       | Reported on page # |
|---------------------------|--------|--------------------------------------------------------------------------------------------------------------------------------------------------------------------------------------|--------------------|
| Title and abstract        | 1      | (a) Indicate the study’s design with a commonly used term in the title or the abstract                                                                                               | 1                  |
|                           |        | (b) Provide in the abstract an informative and balanced summary of what was done and what was found                                                                                  | 2                  |
| <b>Introduction</b>       |        |                                                                                                                                                                                      |                    |
| Background/rationale      | 2      | Explain the scientific background and rationale for the investigation being reported                                                                                                 | 3 - 4              |
| Objectives                | 3      | State specific objectives, including any prespecified hypotheses                                                                                                                     | 3 - 4              |
| <b>Methods</b>            |        |                                                                                                                                                                                      |                    |
| Study design              | 4      | Present key elements of study design early in the paper                                                                                                                              | 5                  |
| Setting                   | 5      | Describe the setting, locations, and relevant dates, including periods of recruitment, exposure, follow-up, and data collection                                                      | 5 - 6              |
| Participants              | 6      | (a) Give the eligibility criteria, and the sources and methods of selection of participants. Describe methods of follow-up                                                           | 5                  |
|                           |        | (b) For matched studies, give matching criteria and number of exposed and unexposed                                                                                                  | n/a                |
| Variables                 | 7      | Clearly define all outcomes, exposures, predictors, potential confounders, and effect modifiers. Give diagnostic criteria, if applicable                                             | 6                  |
| Data sources/ measurement | 8*     | For each variable of interest, give sources of data and details of methods of assessment (measurement). Describe comparability of assessment methods if there is more than one group | n/a                |
| Bias                      | 9      | Describe any efforts to address potential sources of bias                                                                                                                            | 6                  |
| Study size                | 10     | Explain how the study size was arrived at                                                                                                                                            | 5                  |
| Quantitative variables    | 11     | Explain how quantitative variables were handled in the analyses. If applicable, describe which groupings were chosen and why                                                         | 6                  |
| Statistical methods       | 12     | (a) Describe all statistical methods, including those used to control for confounding                                                                                                | 6 - 7              |
|                           |        | (b) Describe any methods used to examine subgroups and interactions                                                                                                                  | 8                  |
|                           |        | (c) Explain how missing data were addressed                                                                                                                                          | 6                  |
|                           |        | (d) If applicable, explain how loss to follow-up was addressed                                                                                                                       | n/a                |
|                           |        | (e) Describe any sensitivity analyses                                                                                                                                                | n/a                |
| <b>Results</b>            |        |                                                                                                                                                                                      |                    |

|                          |     |                                                                                                                                                                                                              |        |
|--------------------------|-----|--------------------------------------------------------------------------------------------------------------------------------------------------------------------------------------------------------------|--------|
| Participants             | 13* | (a) Report numbers of individuals at each stage of study—eg numbers potentially eligible, examined for eligibility, confirmed eligible, included in the study, completing follow-up, and analysed            | n/a    |
|                          |     | (b) Give reasons for non-participation at each stage                                                                                                                                                         | n/a    |
|                          |     | (c) Consider use of a flow diagram                                                                                                                                                                           | n/a    |
| Descriptive data         | 14* | (a) Give characteristics of study participants (eg demographic, clinical, social) and information on exposures and potential confounders                                                                     | 8 - 9  |
|                          |     | (b) Indicate number of participants with missing data for each variable of interest                                                                                                                          | 15     |
|                          |     | (c) Summarise follow-up time (eg, average and total amount)                                                                                                                                                  | n/a    |
| Outcome data             | 15* | Report numbers of outcome events or summary measures over time                                                                                                                                               | n/a    |
| Main results             | 16  | (a) Give unadjusted estimates and, if applicable, confounder-adjusted estimates and their precision (eg, 95% confidence interval). Make clear which confounders were adjusted for and why they were included | 17     |
|                          |     | (b) Report category boundaries when continuous variables were categorized                                                                                                                                    | n/a    |
|                          |     | (c) If relevant, consider translating estimates of relative risk into absolute risk for a meaningful time period                                                                                             | n/a    |
| Other analyses           | 17  | Report other analyses done—eg analyses of subgroups and interactions, and sensitivity analyses                                                                                                               | 8      |
| <b>Discussion</b>        |     |                                                                                                                                                                                                              |        |
| Key results              | 18  | Summarise key results with reference to study objectives                                                                                                                                                     | 9 - 10 |
| <b>Limitations</b>       |     |                                                                                                                                                                                                              |        |
| Interpretation           | 20  | Give a cautious overall interpretation of results considering objectives, limitations, multiplicity of analyses, results from similar studies, and other relevant evidence                                   | 10     |
| Generalisability         | 21  | Discuss the generalisability (external validity) of the study results                                                                                                                                        | 10     |
| <b>Other information</b> |     |                                                                                                                                                                                                              |        |
| Funding                  | 22  | Give the source of funding and the role of the funders for the present study and, if applicable, for the original study on which the present article is based                                                | 11     |

\*Give information separately for cases and controls in case-control studies and, if applicable, for exposed and unexposed groups in cohort and cross-sectional studies.

**Note:** An Explanation and Elaboration article discusses each checklist item and gives methodological background and published examples of transparent reporting. The STROBE checklist is best used in conjunction with this article (freely available on the Web sites of PLoS Medicine at <http://www.plosmedicine.org/>, Annals of Internal Medicine at <http://www.annals.org/>, and Epidemiology at <http://www.epidem.com/>). Information on the STROBE Initiative is available at [www.strobe-statement.org](http://www.strobe-statement.org).
