# Supplementary figures and images for: Are efforts to attract graduate applicants to UK medical schools effective in increasing the participation of under-represented socioeconomic groups? A national cohort study
Source: PubMed Central journal article supplement — BMJ Open. 2018 Feb 14;8(2):e018946. doi: 10.1136/bmjopen-2017-018946 (PMC5829603; doi:10.1136/bmjopen-2017-018946), 2018-02-14

**Flow diagram showing data linkage for applicants to UKCAT consortium universities between 2006 - 2014**

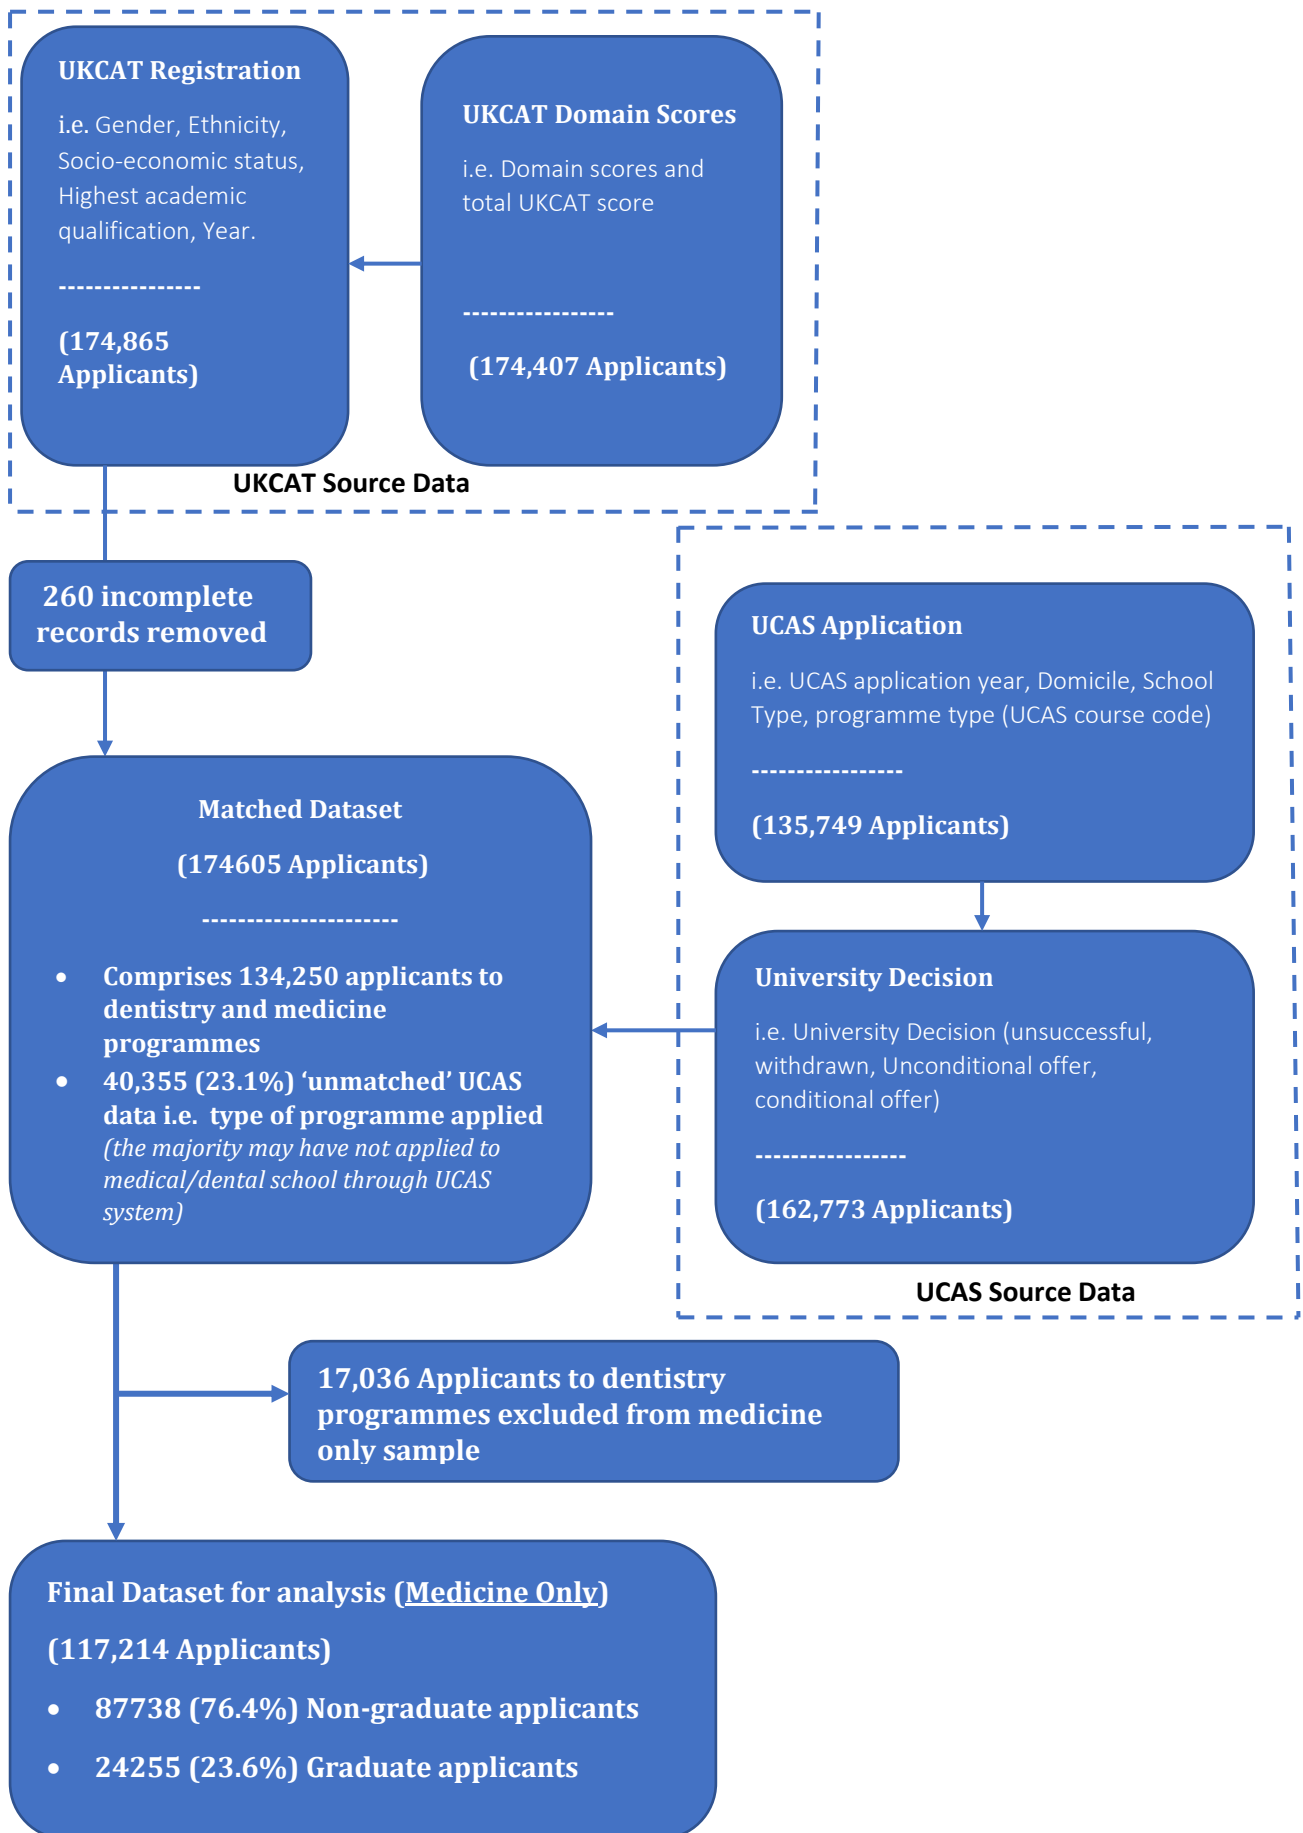

Supplement: bmjopen-2017-018946supp001.pdf [file bmjopen-2017-018946supp001.pdf]

**Chart 1 (group percentages)**

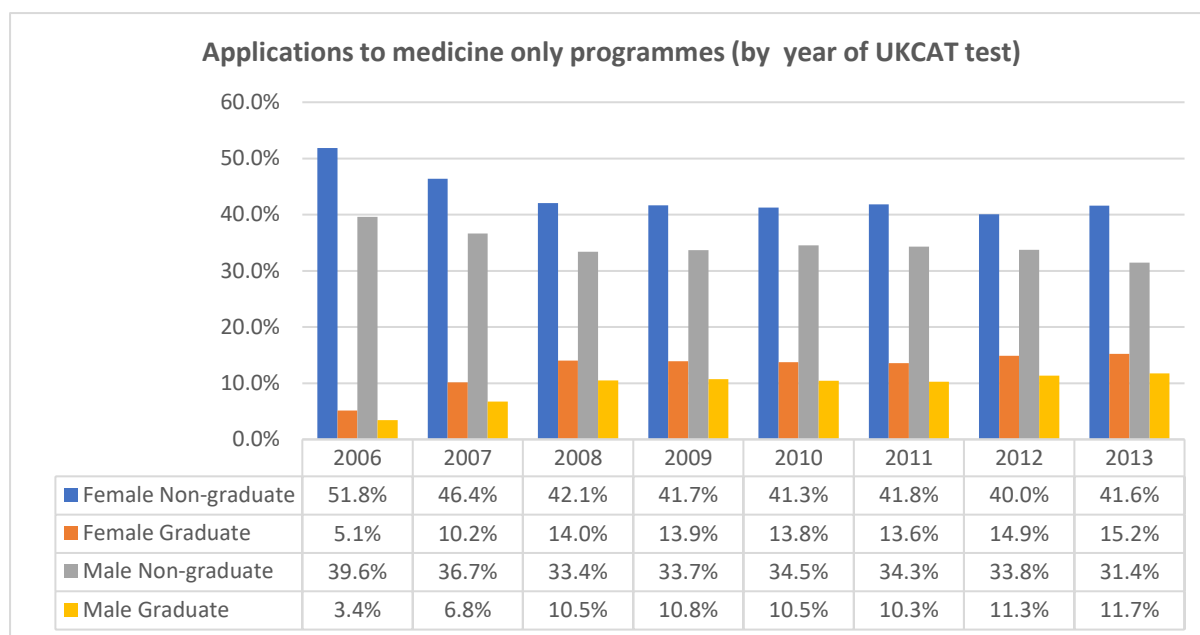

**Chart 2 (raw figures)**

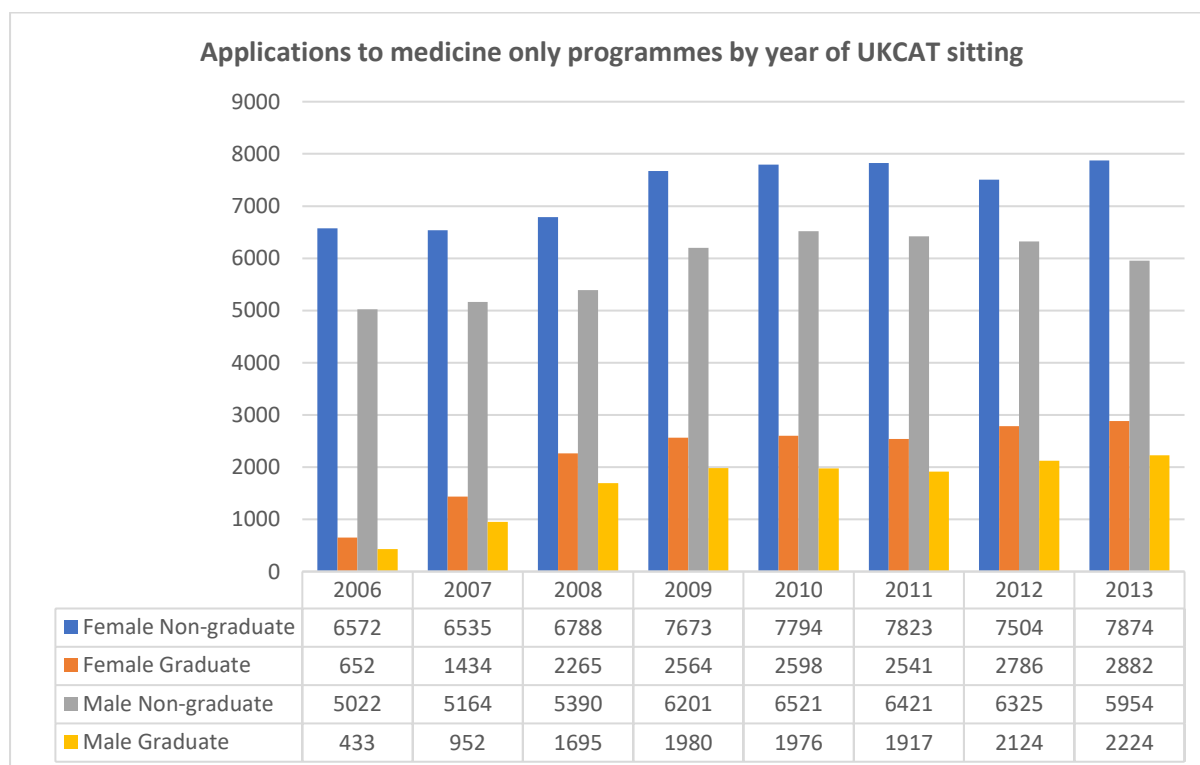

Supplement: bmjopen-2017-018946supp002.pdf [file bmjopen-2017-018946supp002.pdf]
